# Supplementary material for: On a New Theory of Climate Interference for MISs and Glacial Terminations from Antarctica Ice-core Records: Interference Model
Source: Preprints.org preprint supplement (doi:10.20944/preprints202403.0941.v2), 2024-10-18
Supplement: Supplementary file 1 [file supplementary]

## Sheet: EPICA SSA-components
Supplementary dataset: On a New Theory of Climate Interference for MISs and Glacial Terminations from Antarctica Ice-core Records: Interference Model
EPICA components by singular spectrum analysis from: Viaggi P. (2021). Quantitative impact of astronomical and sun-related cycles on the Pleistocene climate system from Antarctica records. Quat. Sci. Adv., Volume 4, October 2021, https://doi.org/10.1016/j.qsa.2021.100037.
Original data from: Past Interglacials Working Group of PAGES (2016), Interglacials of the last 800,000 years. Rev. Geophys. 54:162–219
Age AICC2012 (kyr BP)	EPICA stack	EPICA stack smooth	EPICA stack mid-term	EPICA stack obliquity mod.	EPICA stack short ecc.	EPICA stack obliquity	EPICA stack prec.	EPICA stack half prec.	EPICA stack sun-9.7	EPICA stack sun-6.0	EPICA stack unclear-3.7	EPICA stack sun-2.5	INT-I (x10)	INT-Iw
0.5	2.02561	1.83429	-0.310339	-0.573491	0.54279	1.41377	-2.35979	2.48207	2.09652	0.918847	1.19925	-1.39126	40.1838	47.5712
1	1.96569	1.80086	-0.309916	-0.59874	0.522923	1.50523	-2.30335	2.06791	2.05222	0.878681	0.224677	0.697471	47.371	46.5373
1.5	1.85791	1.76117	-0.309493	-0.623507	0.508847	1.59011	-2.19828	1.58474	1.89025	0.662393	-0.494632	1.3978	40.0822	45.15
2	1.72143	1.71664	-0.309068	-0.648061	0.483375	1.66788	-2.04606	1.05504	1.62892	0.311498	-0.564956	-0.0675325	15.1104	42.8799
2.5	1.61296	1.66927	-0.30865	-0.672451	0.467838	1.73806	-1.85125	0.506504	1.30401	-0.0462173	-0.102907	-1.55746	-5.22525	41.4652
3	1.56756	1.62151	-0.308231	-0.69668	0.436984	1.80016	-1.61857	-0.0327512	0.944831	-0.270777	0.400816	-0.87072	-2.14936	40.0328
3.5	1.56035	1.57617	-0.307814	-0.720631	0.420358	1.85376	-1.35182	-0.5357	0.571614	-0.2737	0.558641	1.14416	13.5887	40.0906
4	1.53947	1.53622	-0.307392	-0.744145	0.38567	1.89846	-1.05626	-0.976695	0.208684	-0.0560713	0.365256	1.67627	13.9377	39.7193
4.5	1.48566	1.50463	-0.30698	-0.767487	0.368477	1.93393	-0.73827	-1.33277	-0.119419	0.270205	0.0131574	-0.142558	-8.2172	40.5501
5	1.43047	1.48396	-0.306565	-0.790534	0.331583	1.95986	-0.404934	-1.58516	-0.392433	0.517549	-0.377556	-1.89374	-29.4193	40.5851
5.5	1.41177	1.47595	-0.306153	-0.813344	0.314228	1.97605	-0.0664861	-1.72116	-0.587473	0.508551	-0.720119	-1.10444	-25.2035	41.7383
6	1.42371	1.48116	-0.305745	-0.835796	0.275859	1.98229	0.266962	-1.73521	-0.692781	0.164255	-0.762585	1.27818	-3.64568	41.7112
6.5	1.42961	1.49876	-0.305344	-0.857887	0.25813	1.97849	0.589465	-1.62886	-0.72206	-0.433876	-0.197988	2.02277	7.02842	42.5878
7	1.41771	1.52663	-0.304936	-0.879852	0.218627	1.96459	0.895017	-1.41127	-0.694291	-1.04602	0.851513	-0.0125368	-4.1916	42.4681
7.5	1.41909	1.56135	-0.304533	-0.901278	0.200464	1.9406	1.17391	-1.0994	-0.612401	-1.37084	1.5818	-2.17077	-15.6246	44.0229
8	1.46577	1.59814	-0.304135	-0.922571	0.159951	1.9066	1.41789	-0.715062	-0.484267	-1.18322	1.07466	-1.42381	-4.73977	45.2015
8.5	1.55081	1.63082	-0.303738	-0.943185	0.141257	1.86273	1.62315	-0.282225	-0.335831	-0.452602	-0.644756	1.38848	20.5328	48.1127
9	1.64861	1.6558	-0.303348	-0.96374	0.0999499	1.8092	1.78729	0.172216	-0.190421	0.5982	-2.23829	2.41257	31.8364	50.1022
9.5	1.76079	1.66811	-0.302955	-0.9839	0.0809055	1.7463	1.90834	0.617672	-0.0672576	1.55233	-2.10146	0.0757756	25.2575	53.0632
10	1.9043	1.66305	-0.30257	-1.00371	0.0390856	1.67435	1.98456	1.02405	0.0257226	1.99102	0.0253984	-2.48367	29.7425	53.986
10.5	2.02335	1.63639	-0.302189	-1.02318	0.0199201	1.59379	2.01489	1.36571	0.0969877	1.69246	2.48168	-1.64478	62.9529	53.9433
11	1.96307	1.58466	-0.301811	-1.04217	-0.0220926	1.50506	1.99908	1.62202	0.160358	0.729908	2.97871	1.53066	91.5972	49.1622
11.5	1.62195	1.50533	-0.301434	-1.06088	-0.0411823	1.40873	1.93829	1.77984	0.231924	-0.539805	0.823512	2.65156	68.9056	41.967
12	1.12068	1.39709	-0.301061	-1.07918	-0.0831392	1.30537	1.83505	1.83337	0.321555	-1.62249	-2.2043	0.0990126	1.04188	32.2353
12.5	0.765072	1.26004	-0.30069	-1.09706	-0.101923	1.19563	1.69535	1.78767	0.43733	-2.06883	-3.31624	-2.56915	-43.3792	25.7912
13	0.749853	1.09577	-0.300327	-1.11449	-0.143607	1.08018	1.52549	1.65207	0.571977	-1.69137	-1.43571	-1.64877	-15.0455	21.9556
13.5	0.934673	0.907316	-0.299965	-1.13173	-0.161901	0.959772	1.32747	1.42878	0.682968	-0.690576	1.61049	1.44178	51.6708	21.2364
14	1.00713	0.698999	-0.299614	-1.14831	-0.203085	0.835146	1.10332	1.12424	0.72531	0.497524	3.00171	2.42134	80.5758	17.7978
14.5	0.801243	0.476127	-0.299261	-1.16463	-0.220715	0.707106	0.857321	0.754887	0.673177	1.41519	1.65614	0.123836	45.0305	12.0904
15	0.420178	0.244612	-0.298909	-1.18051	-0.261197	0.576449	0.594743	0.342632	0.520133	1.75071	-0.943685	-2.1702	-10.6984	2.3685
15.5	0.0745407	0.0105813	-0.298568	-1.19588	-0.277932	0.444017	0.32166	-0.0851385	0.286456	1.4564	-2.33212	-1.39843	-30.7954	-6.95855
16	-0.164801	-0.219923	-0.298233	-1.21077	-0.317526	0.310653	0.0440002	-0.501171	0.00498449	0.716229	-1.47083	1.15185	-15.7081	-17.0893
16.5	-0.396269	-0.441114	-0.297898	-1.22536	-0.333213	0.177205	-0.232226	-0.881408	-0.289011	-0.159192	0.481093	1.92377	-8.36241	-25.7393
17	-0.709027	-0.647927	-0.297571	-1.23946	-0.371715	0.0445127	-0.500591	-1.20381	-0.55662	-0.85104	1.59065	0.0892257	-32.9642	-35.5832
17.5	-1.05197	-0.836244	-0.297247	-1.2531	-0.386176	-0.0865905	-0.752953	-1.44797	-0.76101	-1.14662	1.06508	-1.61896	-66.8555	-43.5936
18	-1.30033	-1.00307	-0.296932	-1.26639	-0.423435	-0.215275	-0.981717	-1.59873	-0.872561	-1.01452	-0.255407	-0.992719	-79.1769	-51.1216
18.5	-1.39786	-1.14654	-0.296618	-1.27921	-0.436528	-0.340749	-1.18123	-1.64876	-0.873748	-0.597594	-1.00575	0.792305	-68.6789	-55.2737
19	-1.39684	-1.26576	-0.29632	-1.29148	-0.472394	-0.462251	-1.34768	-1.59827	-0.762743	-0.12528	-0.661025	1.24318	-57.7426	-58.9879
19.5	-1.38447	-1.3607	-0.29602	-1.30332	-0.484007	-0.579036	-1.47926	-1.45468	-0.553981	0.198096	0.167	0.0277362	-57.5747	-60.8194
20	-1.40233	-1.43232	-0.295725	-1.31452	-0.518357	-0.690405	-1.57516	-1.23081	-0.27621	0.284889	0.584596	-0.95545	-59.8716	-63.8355
20.5	-1.44004	-1.48256	-0.295437	-1.32551	-0.528364	-0.795702	-1.63502	-0.943288	0.0317542	0.188373	0.331415	-0.492295	-54.6408	-65.6059
21	-1.4726	-1.5143	-0.295155	-1.33593	-0.561108	-0.894322	-1.65925	-0.612038	0.325797	0.0516133	-0.151584	0.468055	-46.6393	-68.1699
21.5	-1.48049	-1.53091	-0.294882	-1.34584	-0.569413	-0.9857	-1.64891	-0.259129	0.562925	0.018174	-0.341445	0.544552	-43.1967	-68.7156
22	-1.45281	-1.53577	-0.294616	-1.35536	-0.600445	-1.06934	-1.60566	0.0928358	0.708833	0.150691	-0.154528	-0.107257	-42.3485	-69.5955
22.5	-1.3984	-1.53197	-0.29435	-1.36443	-0.606992	-1.1448	-1.53196	0.42209	0.743695	0.393576	0.111272	-0.378566	-36.5047	-68.7027
23	-1.3524	-1.52226	-0.294099	-1.37284	-0.636225	-1.2117	-1.43067	0.709232	0.66508	0.59937	0.18949	-0.0104811	-27.9284	-69.0857
23.5	-1.35475	-1.50903	-0.293851	-1.38079	-0.64095	-1.2697	-1.30495	0.938165	0.487365	0.605326	0.0833949	0.226629	-25.4936	-68.8791
24	-1.41367	-1.49422	-0.293612	-1.38834	-0.668372	-1.31858	-1.15794	1.09746	0.24014	0.327752	-0.0418708	-0.0415727	-32.4494	-70.6897
24.5	-1.49759	-1.47915	-0.293377	-1.39536	-0.671264	-1.35814	-0.991517	1.18209	-0.0377618	-0.174251	-0.0761753	-0.22153	-40.3728	-71.7466
25	-1.56983	-1.46455	-0.293155	-1.40199	-0.69684	-1.38827	-0.807693	1.19198	-0.302689	-0.717112	-0.0511704	0.0919301	-43.7501	-73.9175
25.5	-1.61238	-1.45063	-0.292941	-1.40796	-0.697836	-1.40892	-0.609803	1.13067	-0.510598	-1.07271	-0.0361088	0.352795	-45.5342	-74.213
26	-1.61366	-1.43723	-0.292729	-1.41347	-0.721557	-1.42011	-0.401529	1.00562	-0.626974	-1.067	-0.0296158	0.00931782	-49.5804	-74.6281
26.5	-1.55943	-1.42401	-0.292525	-1.41859	-0.720721	-1.42194	-0.186671	0.827685	-0.633795	-0.66571	0.00333932	-0.487292	-49.9622	-72.5184
27	-1.45107	-1.41052	-0.292331	-1.42301	-0.742604	-1.41454	0.0305474	0.610068	-0.531519	-0.00193195	0.0532367	-0.302772	-40.1486	-70.5627
27.5	-1.32666	-1.39625	-0.292146	-1.42708	-0.739909	-1.39815	0.244658	0.366536	-0.338359	0.667393	0.0685632	0.418261	-24.3023	-67.0704
28	-1.24053	-1.38061	-0.291971	-1.4307	-0.759986	-1.37304	0.450237	0.111493	-0.0891404	1.0729	0.0395857	0.64086	-16.2977	-65.374
28.5	-1.21888	-1.36289	-0.291803	-1.43378	-0.755519	-1.33955	0.642931	-0.139769	0.169896	1.05559	0.00948124	-0.0596406	-21.4215	-63.5365
29	-1.2448	-1.34225	-0.291643	-1.4362	-0.773836	-1.29805	0.818879	-0.372452	0.390986	0.635637	-0.0133478	-0.782884	-31.2291	-63.9035
29.5	-1.28322	-1.31785	-0.291494	-1.43829	-0.76763	-1.24899	0.974706	-0.572888	0.534633	0.00629635	-0.0678217	-0.46617	-33.3765	-63.4856
30	-1.31243	-1.289	-0.291355	-1.43979	-0.784282	-1.19285	1.10763	-0.729924	0.575072	-0.554203	-0.148002	0.568749	-28.8896	-64.0746
30.5	-1.32257	-1.2552	-0.291223	-1.44088	-0.776406	-1.13014	1.19254	-0.826682	0.471323	-0.799798	-0.139996	0.932448	-28.0882	-62.9116
31	-1.2964	-1.21609	-0.291101	-1.44125	-0.791418	-1.06143	1.25319	-0.865418	0.264111	-0.635169	0.0504137	-0.0170371	-35.3511	-61.9584
31.5	-1.21525	-1.17144	-0.290987	-1.44125	-0.781986	-0.987319	1.29007	-0.846933	-0.0122331	-0.155291	0.333769	-1.08659	-39.7876	-58.8825
32	-1.09421	-1.12129	-0.290886	-1.44073	-0.795457	-0.908415	1.304	-0.775637	-0.30877	0.397186	0.400902	-0.725558	-31.4336	-56.6997
32.5	-0.997626	-1.0662	-0.290793	-1.43987	-0.784513	-0.825341	1.29582	-0.659681	-0.571549	0.739324	0.0240656	0.72737	-17.8516	-53.8273
33	-0.983016	-1.00742	-0.29071	-1.43838	-0.796532	-0.738762	1.26668	-0.509515	-0.748702	0.683606	-0.568461	1.30042	-18.4037	-53.2387
33.5	-1.02874	-0.946785	-0.290634	-1.43626	-0.784171	-0.649333	1.21851	-0.336342	-0.798068	0.23157	-0.769036	0.0734937	-35.4027	-52.1771
34	-1.04505	-0.886555	-0.290571	-1.43373	-0.794828	-0.557726	1.15336	-0.15234	-0.697621	-0.426732	-0.206945	-1.37529	-47.8243	-52.1747
34.5	-0.968971	-0.829156	-0.290519	-1.43086	-0.781175	-0.464598	1.07286	0.0298431	-0.450383	-0.995339	0.741982	-0.987207	-35.554	-50.0619
35	-0.837541	-0.777024	-0.29048	-1.42727	-0.790615	-0.370617	0.978594	0.198045	-0.0868096	-1.20396	1.18056	0.842301	-9.70255	-48.2936
35.5	-0.745724	-0.732383	-0.29045	-1.4234	-0.775791	-0.276424	0.871707	0.339634	0.332202	-0.94002	0.530854	1.58472	-0.469602	-44.963
36	-0.718732	-0.696971	-0.290432	-1.41889	-0.784135	-0.182663	0.753142	0.443794	0.730801	-0.292647	-0.758025	0.099582	-16.9947	-42.7836
36.5	-0.667713	-0.671796	-0.290424	-1.41398	-0.768273	-0.0899547	0.625039	0.505747	1.04104	0.502333	-1.48346	-1.57331	-29.4525	-39.0571
37	-0.51765	-0.657053	-0.290423	-1.40855	-0.775663	0.00110758	0.489672	0.524452	1.20648	1.14605	-0.889622	-1.05048	-10.4697	-36.3442
37.5	-0.339785	-0.652201	-0.29044	-1.40253	-0.758925	0.0899504	0.347704	0.498027	1.1825	1.37815	0.49419	0.923809	24.6244	-33.3924
38	-0.290921	-0.656093	-0.290466	-1.39613	-0.765526	0.176023	0.199955	0.428587	0.955507	1.11156	1.40911	1.57913	34.0774	-34.0238
38.5	-0.438939	-0.667064	-0.290502	-1.38937	-0.748026	0.258826	0.0489122	0.32646	0.554856	0.488428	1.1214	0.0759028	4.46889	-35.8805
39	-0.6911	-0.682992	-0.290552	-1.3819	-0.753967	0.337867	-0.102609	0.205148	0.0417474	-0.208571	0.00781911	-1.4519	-35.9691	-40.01
39.5	-0.885734	-0.701382	-0.290615	-1.37404	-0.735901	0.412707	-0.251739	0.0793937	-0.499098	-0.687669	-0.915097	-0.947433	-52.0949	-42.0954
40	-0.945138	-0.719546	-0.290683	-1.36577	-0.741332	0.482946	-0.395954	-0.0368981	-0.976827	-0.78374	-0.996536	0.777632	-43.2716	-43.6156
40.5	-0.915408	-0.734871	-0.290771	-1.35705	-0.722841	0.54821	-0.532991	-0.132724	-1.31419	-0.531204	-0.435207	1.33252	-34.3625	-42.4326
41	-0.873448	-0.745147	-0.290871	-1.34785	-0.727931	0.60817	-0.660978	-0.20011	-1.45668	-0.128533	0.153318	0.090319	-39.6115	-41.8387
41.5	-0.843444	-0.74887	-0.290977	-1.33816	-0.709159	0.662539	-0.778921	-0.234942	-1.38094	0.167875	0.42165	-1.15115	-46.3218	-39.9947
42	-0.808005	-0.745439	-0.291104	-1.32798	-0.714019	0.711073	-0.885763	-0.23635	-1.09866	0.177488	0.48312	-0.78226	-39.6445	-39.5699
42.5	-0.768995	-0.735146	-0.291241	-1.31742	-0.695116	0.75357	-0.978676	-0.206001	-0.658048	-0.113294	0.52053	0.550831	-24.3486	-38.19
43	-0.758972	-0.718984	-0.291394	-1.30633	-0.699923	0.789866	-1.05478	-0.148352	-0.131416	-0.543111	0.420454	1.04685	-19.1814	-38.298
43.5	-0.787603	-0.698411	-0.291552	-1.29498	-0.681012	0.819841	-1.11284	-0.0705565	0.404446	-0.855274	-0.053656	0.170195	-29.6539	-37.1511
44	-0.801501	-0.675189	-0.291728	-1.28307	-0.68588	0.843415	-1.15229	0.0182448	0.872616	-0.823643	-0.787949	-0.826301	-41.1658	-36.5586
44.5	-0.72023	-0.651273	-0.291919	-1.27069	-0.667083	0.860557	-1.17259	0.108084	1.2048	-0.36435	-1.19069	-0.685181	-34.6907	-33.4882
45	-0.523815	-0.628595	-0.292121	-1.258	-0.672158	0.871259	-1.17365	0.188675	1.35362	0.407338	-0.713869	0.277794	-10.1111	-30.5093
45.5	-0.29598	-0.608693	-0.292343	-1.24475	-0.653585	0.875576	-1.15638	0.24915	1.29557	1.20836	0.473748	0.767203	15.2254	-26.2569
46	-0.163463	-0.592336	-0.292572	-1.23121	-0.65895	0.873577	-1.12194	0.280551	1.04063	1.71431	1.48491	0.259445	23.4875	-24.6772
46.5	-0.199783	-0.579376	-0.292818	-1.21724	-0.640719	0.865386	-1.07	0.278409	0.63255	1.70528	1.44524	-0.46621	12.3989	-24.2793
47	-0.384039	-0.568908	-0.293073	-1.20276	-0.646467	0.851153	-0.999842	0.242471	0.14009	1.1529	0.272132	-0.510278	-9.93672	-27.4037
47.5	-0.619805	-0.559587	-0.293348	-1.18803	-0.628677	0.831066	-0.909686	0.17833	-0.34996	0.23698	-1.15929	0.0717553	-32.1086	-30.3916
48	-0.803303	-0.549947	-0.293641	-1.17297	-0.634911	0.805341	-0.798159	0.0942015	-0.753566	-0.745811	-1.73833	0.465478	-47.7237	-34.1253
48.5	-0.874156	-0.538608	-0.29394	-1.15732	-0.617604	0.774225	-0.665465	-0.00159937	-1.00551	-1.50555	-1.02551	0.205086	-52.9319	-35.0225
49	-0.83098	-0.524438	-0.294259	-1.14141	-0.624381	0.737997	-0.513287	-0.101239	-1.07023	-1.85621	0.41888	-0.276053	-47.2019	-35.2746
49.5	-0.723304	-0.50665	-0.29459	-1.12517	-0.60765	0.696953	-0.34505	-0.198427	-0.948151	-1.75992	1.49335	-0.326605	-34.1526	-32.9428
50	-0.615188	-0.48482	-0.294935	-1.10853	-0.614961	0.651423	-0.164914	-0.287597	-0.672679	-1.29921	1.42465	0.0571509	-23.096	-31.2493
50.5	-0.538959	-0.458817	-0.295302	-1.09144	-0.598843	0.601758	0.0225574	-0.363709	-0.301722	-0.616988	0.327184	0.300765	-20.1574	-28.2296
51	-0.471583	-0.428738	-0.29568	-1.07413	-0.606789	0.548311	0.212427	-0.422489	0.0933621	0.139445	-0.937026	0.0927014	-22.4987	-26.3596
51.5	-0.361194	-0.394939	-0.29607	-1.05646	-0.591286	0.491473	0.399858	-0.460299	0.441061	0.849038	-1.4318	-0.20707	-18.6155	-23.0167
52	-0.191033	-0.358113	-0.296482	-1.03842	-0.599862	0.43165	0.579963	-0.474473	0.681925	1.41297	-0.845921	-0.15514	-3.0379	-20.7914
52.5	-0.0150324	-0.319324	-0.296905	-1.01996	-0.584973	0.369237	0.747529	-0.463758	0.777948	1.73755	0.302679	0.110961	16.8031	-17.9164
53	0.0806657	-0.279925	-0.297347	-1.00136	-0.594185	0.304667	0.897571	-0.42783	0.719549	1.73597	1.10796	0.142395	25.874	-17.7474
53.5	0.0496422	-0.241398	-0.297805	-0.98222	-0.579929	0.238374	1.02543	-0.366941	0.528254	1.35497	0.995971	-0.083405	18.327	-18.324
54	-0.0822602	-0.205201	-0.298277	-0.963114	-0.589755	0.170785	1.12758	-0.281557	0.249861	0.616824	0.155668	-0.132656	0.553544	-21.814
54.5	-0.242586	-0.172647	-0.298767	-0.943438	-0.576085	0.102346	1.20434	-0.169507	-0.0559259	-0.334239	-0.637094	0.159717	-15.4865	-24.7493
55	-0.372938	-0.144852	-0.299269	-0.923511	-0.586477	0.0335013	1.25714	-0.0304067	-0.328973	-1.26151	-0.757055	0.264247	-26.3231	-28.5094
55.5	-0.448515	-0.122774	-0.29979	-0.903286	-0.573377	-0.0353104	1.28629	0.130192	-0.522115	-1.9098	-0.273411	-0.185123	-32.8573	-29.9895
56	-0.452705	-0.10731	-0.300327	-0.882883	-0.5843	-0.103645	1.2923	0.30394	-0.605405	-2.06956	0.253729	-0.529757	-32.259	-31.3361
56.5	-0.376681	-0.0993719	-0.300881	-0.862171	-0.571676	-0.171075	1.27627	0.480963	-0.568678	-1.65423	0.372695	-0.0283624	-20.2715	-30.0664
57	-0.242784	-0.0998639	-0.301451	-0.84112	-0.583067	-0.237172	1.23908	0.648899	-0.425722	-0.75775	0.11597	0.730793	-4.11536	-28.9849
57.5	-0.100343	-0.109535	-0.30204	-0.820024	-0.570907	-0.301524	1.18012	0.791055	-0.21403	0.347361	-0.157079	0.461407	4.14344	-26.4035
58	0.0199552	-0.128845	-0.302642	-0.798502	-0.582678	-0.363722	1.09893	0.891149	0.0186501	1.31583	-0.148598	-0.668801	4.59613	-25.6043
58.5	0.111769	-0.157939	-0.303263	-0.776823	-0.570845	-0.423379	0.996293	0.937563	0.228408	1.86342	0.0980458	-0.955109	10.9431	-24.8067
59	0.145381	-0.196719	-0.303907	-0.754895	-0.582945	-0.48012	0.873512	0.922091	0.378052	1.85032	0.25589	0.244574	24.0257	-27.0357
59.5	0.0659473	-0.244885	-0.304561	-0.732637	-0.571383	-0.533594	0.732096	0.840293	0.441247	1.31979	0.100828	1.26317	25.5526	-30.1087
60	-0.136041	-0.301853	-0.305231	-0.710244	-0.583674	-0.583457	0.574163	0.69298	0.409323	0.474296	-0.215427	0.464485	2.17213	-36.041
60.5	-0.373525	-0.366615	-0.305926	-0.687735	-0.572288	-0.629405	0.40418	0.490033	0.299144	-0.389965	-0.303366	-1.11686	-28.1219	-41.1291
61	-0.542053	-0.437629	-0.306636	-0.664972	-0.584706	-0.671139	0.227302	0.246234	0.142406	-1.01273	-0.0362844	-1.15992	-38.2044	-46.6254
61.5	-0.631458	-0.512815	-0.307359	-0.641969	-0.573343	-0.708397	0.0477163	-0.0232267	-0.0273565	-1.27169	0.25939	0.478432	-27.6781	-49.7865
62	-0.711535	-0.589644	-0.308102	-0.618875	-0.585765	-0.740944	-0.130437	-0.300868	-0.175349	-1.18321	0.223829	1.48926	-23.3046	-53.4457
62.5	-0.824597	-0.665315	-0.308863	-0.595637	-0.574385	-0.768571	-0.303607	-0.568249	-0.271283	-0.86079	-0.109453	0.402528	-39.5831	-55.4393
63	-0.923516	-0.736969	-0.309647	-0.572195	-0.586696	-0.791093	-0.468409	-0.807203	-0.296034	-0.446213	-0.347572	-1.26986	-58.9492	-58.0219
63.5	-0.937697	-0.801942	-0.310442	-0.548644	-0.575127	-0.808369	-0.62127	-1.00101	-0.245271	-0.0471578	-0.189424	-1.16955	-55.1627	-58.4424
64	-0.876611	-0.857948	-0.311257	-0.524815	-0.587234	-0.820289	-0.759195	-1.13631	-0.131023	0.285162	0.218302	0.550819	-32.1584	-59.3416
64.5	-0.826659	-0.903136	-0.312088	-0.501039	-0.575379	-0.826763	-0.880539	-1.20538	0.0182247	0.536017	0.433236	1.46614	-18.4757	-58.877
65	-0.840508	-0.936024	-0.312938	-0.477011	-0.587146	-0.827758	-0.984161	-1.2049	0.166173	0.704988	0.228503	0.353412	-29.4084	-59.8363
65.5	-0.876915	-0.955439	-0.313807	-0.45299	-0.574909	-0.823259	-1.06881	-1.13346	0.282104	0.790451	-0.1613	-1.15624	-46.1222	-59.4625
66	-0.875951	-0.960575	-0.314698	-0.428771	-0.586206	-0.813283	-1.13361	-0.993897	0.340756	0.762998	-0.372311	-1.02368	-45.627	-59.8598
66.5	-0.848228	-0.95116	-0.315603	-0.404506	-0.573484	-0.797891	-1.1781	-0.795094	0.320838	0.572155	-0.317655	0.415113	-30.7423	-58.761
67	-0.85002	-0.92759	-0.316535	-0.380161	-0.584229	-0.777176	-1.20202	-0.549126	0.215361	0.204293	-0.147687	1.17064	-23.6665	-59.0434
67.5	-0.895668	-0.890909	-0.317477	-0.355763	-0.570883	-0.751267	-1.20572	-0.269696	0.0383491	-0.275538	0.0431273	0.369005	-32.9586	-58.2804
68	-0.932773	-0.842661	-0.318436	-0.331175	-0.58098	-0.720316	-1.18967	0.0277985	-0.182228	-0.729973	0.301547	-0.794517	-45.1795	-58.4092
68.5	-0.907449	-0.784717	-0.31942	-0.306623	-0.566916	-0.684514	-1.15408	0.326951	-0.412755	-0.994263	0.584129	-0.832074	-43.5956	-56.4023
69	-0.829156	-0.719178	-0.32042	-0.281882	-0.576233	-0.644088	-1.09944	0.610991	-0.614726	-0.948803	0.583041	0.143978	-31.4758	-54.611
69.5	-0.749348	-0.648369	-0.321437	-0.257232	-0.561359	-0.599278	-1.0264	0.863043	-0.751356	-0.58707	-0.00628637	0.799999	-24.4737	-50.9246
70	-0.681935	-0.574885	-0.322472	-0.232653	-0.569846	-0.55037	-0.936096	1.0674	-0.79238	-0.0310696	-0.953693	0.407879	-29.133	-48.0766
70.5	-0.575746	-0.5016	-0.323531	-0.207935	-0.554075	-0.497662	-0.829982	1.2116	-0.71561	0.515047	-1.40649	-0.385254	-31.9389	-43.5502
71	-0.389957	-0.431576	-0.324603	-0.183245	-0.561593	-0.441487	-0.709893	1.28618	-0.516014	0.838819	-0.651727	-0.600895	-18.6445	-39.8339
71.5	-0.18026	-0.367822	-0.325697	-0.158482	-0.544861	-0.382187	-0.579106	1.28321	-0.214043	0.798711	0.95327	-0.139261	6.91554	-35.1565
72	-0.0688163	-0.312954	-0.326812	-0.133716	-0.551374	-0.320136	-0.440889	1.19942	0.151498	0.405287	2.05802	0.374242	24.1554	-32.9841
72.5	-0.128291	-0.268878	-0.327945	-0.109093	-0.533556	-0.255717	-0.296848	1.03895	0.533066	-0.163937	1.51072	0.448689	18.4433	-31.2761
73	-0.304397	-0.236573	-0.329095	-0.0843885	-0.538986	-0.189337	-0.148242	0.811127	0.876895	-0.649693	-0.457166	0.0890918	-6.19796	-31.7457
73.5	-0.436761	-0.215999	-0.330266	-0.0596836	-0.520076	-0.1214	0.00357765	0.530502	1.13649	-0.820094	-2.21425	-0.325521	-27.2072	-30.3091
74	-0.388928	-0.206076	-0.331454	-0.0351452	-0.524358	-0.0523287	0.156767	0.214566	1.27292	-0.585371	-2.1698	-0.41676	-24.7097	-28.1656
74.5	-0.170276	-0.20473	-0.332666	-0.0107328	-0.504259	0.0174378	0.30851	-0.118819	1.25432	-0.0479093	-0.309886	-0.111463	1.44535	-23.1305
75	0.0684537	-0.209036	-0.333893	0.0137797	-0.507337	0.0874799	0.455454	-0.451129	1.06647	0.552996	1.7551	0.323805	29.6272	-19.317
75.5	0.152349	-0.215468	-0.335138	0.0382318	-0.485998	0.157347	0.592879	-0.764759	0.716812	0.950004	2.25975	0.452563	35.817	-16.0972
76	0.0271882	-0.220161	-0.336408	0.0624544	-0.48785	0.226613	0.716891	-1.04144	0.23826	0.979427	0.91448	0.102054	13.7448	-16.4697
76.5	-0.198828	-0.219155	-0.337696	0.0868282	-0.465252	0.294842	0.828242	-1.25902	-0.312457	0.667404	-0.90567	-0.364168	-17.6694	-16.812
77	-0.370286	-0.20869	-0.339002	0.110879	-0.465832	0.361613	0.9286	-1.39801	-0.864656	0.177191	-1.64531	-0.476471	-36.11	-17.916
77.5	-0.41283	-0.185651	-0.34032	0.135002	-0.441942	0.426505	1.0186	-1.44616	-1.34398	-0.294845	-1.00794	-0.093169	-33.8825	-16.4291
78	-0.359269	-0.148107	-0.341667	0.158953	-0.44121	0.489116	1.0984	-1.3975	-1.68105	-0.603219	0.072548	0.475458	-21.7017	-14.9162
78.5	-0.284294	-0.0957304	-0.343029	0.182789	-0.416009	0.549047	1.16686	-1.2537	-1.82053	-0.713204	0.600712	0.584709	-14.6235	-11.4574
79	-0.218706	-0.0299079	-0.344416	0.206461	-0.41393	0.605919	1.2222	-1.02372	-1.73046	-0.691917	0.482835	-0.0633819	-17.5042	-8.77683
79.5	-0.133592	0.0464564	-0.345819	0.230098	-0.387424	0.659378	1.26223	-0.723053	-1.40828	-0.64308	0.307443	-0.801098	-18.4961	-4.31839
80	-0.00123531	0.129282	-0.347235	0.253435	-0.384023	0.709074	1.28477	-0.372308	-0.884716	-0.626378	0.402359	-0.576542	-5.41559	-0.516705
80.5	0.14812	0.213638	-0.348678	0.276644	-0.35617	0.754687	1.28771	0.00364999	-0.223157	-0.614727	0.395812	0.541397	17.1717	4.67804
81	0.258413	0.29405	-0.350136	0.299835	-0.351448	0.795925	1.26901	0.377927	0.489973	-0.505461	-0.177263	1.10204	29.504	8.33071
81.5	0.334501	0.364866	-0.351619	0.322612	-0.322256	0.832504	1.22719	0.724398	1.15871	-0.185342	-1.04347	0.150905	25.1363	12.9581
82	0.457066	0.420761	-0.353119	0.345327	-0.316211	0.86418	1.16117	1.01917	1.6903	0.378395	-1.27945	-1.1844	23.2537	16.6354
82.5	0.679213	0.457344	-0.354633	0.367952	-0.285732	0.890744	1.06996	1.24177	2.00897	1.07921	-0.335482	-0.993631	46.8914	21.8897
83	0.920419	0.471725	-0.356172	0.390278	-0.278366	0.911983	0.953004	1.37681	2.06741	1.68575	1.15883	0.664119	85.7365	25.1091
83.5	1.0035	0.462902	-0.357727	0.412408	-0.246593	0.927743	0.809897	1.41446	1.85183	1.92387	1.81555	1.5342	100.856	26.8199
84	0.829498	0.431826	-0.359307	0.434298	-0.237954	0.937898	0.64154	1.35285	1.38805	1.61021	0.882685	0.274405	69.2467	23.5017
84.5	0.495991	0.381142	-0.360901	0.456187	-0.204907	0.942328	0.452811	1.20336	0.746343	0.778012	-0.841299	-1.40656	17.6537	18.6117
85	0.190077	0.314723	-0.362512	0.47772	-0.195024	0.940969	0.249764	0.984688	0.024885	-0.338491	-1.77313	-1.13416	-11.2529	11.8824
85.5	0.00582846	0.237195	-0.364148	0.49889	-0.160728	0.933784	0.0377213	0.717435	-0.669184	-1.40031	-1.10843	0.697584	-8.17386	7.42479
86	-0.101567	0.153551	-0.365798	0.519908	-0.149654	0.920752	-0.17794	0.423706	-1.23731	-2.08041	0.446311	1.51257	-1.87863	3.18411
86.5	-0.208193	0.0688656	-0.367472	0.540799	-0.114181	0.901904	-0.391895	0.12536	-1.6051	-2.18254	1.42026	0.223637	-14.4924	1.33301
87	-0.313777	-0.011983	-0.369163	0.561254	-0.101928	0.877288	-0.599138	-0.157315	-1.73121	-1.70501	1.01358	-1.29681	-35.0846	-0.667131
87.5	-0.357908	-0.0846198	-0.37087	0.581448	-0.0653386	0.84698	-0.795464	-0.407227	-1.61064	-0.830462	-0.228736	-0.970077	-38.5039	-0.133118
88	-0.307636	-0.145479	-0.372597	0.601488	-0.0523432	0.809248	-0.977007	-0.611222	-1.27643	0.153678	-1.07675	0.625585	-21.7635	0.410534
88.5	-0.198877	-0.192025	-0.374345	0.621352	-0.0150225	0.765755	-1.14048	-0.761622	-0.797332	0.958826	-0.847019	1.24056	-3.49325	2.81126
89	-0.0920332	-0.222875	-0.376113	0.640781	-0.000946791	0.716698	-1.28298	-0.855043	-0.259403	1.39814	0.0815237	0.158958	2.21622	3.68915
89.5	-0.0271737	-0.237829	-0.377897	0.65994	0.0374592	0.662311	-1.40206	-0.892194	0.248856	1.42855	0.783829	-1.012	1.36791	4.86071
90	-0.0160816	-0.237831	-0.379701	0.678775	0.0525695	0.602857	-1.49541	-0.87683	0.652426	1.1361	0.711996	-0.730795	3.51984	3.80694
90.5	-0.0537565	-0.22478	-0.381525	0.697424	0.091984	0.538637	-1.56024	-0.814412	0.900717	0.678221	0.0917562	0.472303	7.14865	3.38983
91	-0.121419	-0.201153	-0.383363	0.715645	0.108047	0.469973	-1.59402	-0.712483	0.97396	0.207892	-0.46666	0.925967	2.44961	1.69408
91.5	-0.181322	-0.16954	-0.385223	0.733681	0.148355	0.397211	-1.59473	-0.579775	0.886777	-0.170871	-0.568476	0.129737	-10.0331	1.65241
92	-0.1972	-0.1323	-0.387102	0.751247	0.165301	0.320748	-1.56109	-0.426313	0.678832	-0.417748	-0.285163	-0.75195	-19.1324	1.05818
92.5	-0.162602	-0.0914611	-0.388998	0.768606	0.206424	0.240978	-1.49311	-0.263349	0.403973	-0.539353	0.0738771	-0.57877	-15.6972	2.35196
93	-0.101247	-0.0487383	-0.390912	0.785606	0.224116	0.158338	-1.39163	-0.102149	0.120947	-0.555438	0.308152	0.330578	-5.12391	2.92474
93.5	-0.0425484	-0.00551328	-0.39285	0.802453	0.265933	0.0732813	-1.25833	0.0467048	-0.117279	-0.482223	0.39332	0.741046	0.720614	5.07515
94	0.00388924	0.0372644	-0.394797	0.818776	0.284303	-0.0137208	-1.09582	0.174138	-0.272131	-0.335663	0.33288	0.146479	-3.55557	6.26891
94.5	0.0488474	0.0791078	-0.396763	0.834588	0.326703	-0.102164	-0.90783	0.273027	-0.324766	-0.14881	0.0854335	-0.626916	-9.87498	8.92818
95	0.103811	0.119845	-0.398754	0.850335	0.345565	-0.191545	-0.698638	0.338714	-0.278959	0.0189802	-0.312479	-0.533721	-8.60502	10.5435
95.5	0.16511	0.159362	-0.400753	0.865673	0.388778	-0.281939	-0.471268	0.369582	-0.160428	0.0977926	-0.627167	0.313045	0.933165	13.4572
96	0.21782	0.1974	-0.40278	0.88063	0.408453	-0.37229	-0.231472	0.366962	-0.00803129	0.0424794	-0.553533	0.750729	8.81147	15.0404
96.5	0.253415	0.233528	-0.404822	0.895178	0.452125	-0.462057	0.0150439	0.334143	0.134862	-0.132682	-0.0303772	0.113271	9.14685	17.6384
97	0.281116	0.26725	-0.406875	0.909425	0.472222	-0.550661	0.262344	0.276814	0.228864	-0.335376	0.614956	-0.754187	7.17525	18.844
97.5	0.314972	0.298172	-0.408953	0.923162	0.516273	-0.637531	0.504712	0.203589	0.24887	-0.418826	0.888496	-0.566251	12.5354	21.2839
98	0.350413	0.326165	-0.411044	0.936806	0.536643	-0.72208	0.736519	0.124234	0.187153	-0.257012	0.529111	0.508697	21.6903	22.6317
98.5	0.371333	0.35146	-0.413151	0.949858	0.580859	-0.803739	0.952403	0.0483102	0.0524639	0.173944	-0.250792	0.920571	22.1073	25.3658
99	0.384437	0.374584	-0.415276	0.962628	0.601299	-0.881942	1.14748	-0.0151684	-0.130088	0.755337	-0.903666	-0.0423357	10.7827	27.03
99.5	0.424085	0.396089	-0.417418	0.975076	0.645529	-0.956113	1.31856	-0.0579002	-0.32693	1.25356	-0.956627	-1.03587	4.41868	30.0065
100	0.500161	0.416205	-0.419578	0.987056	0.665872	-1.02572	1.46309	-0.0739679	-0.500047	1.40661	-0.364881	-0.532243	16.0619	31.4447
100.5	0.556581	0.434634	-0.421757	0.998526	0.710061	-1.09462	1.57838	-0.0615003	-0.613815	1.04269	0.473292	0.824694	34.3595	33.0076
101	0.518015	0.450594	-0.423946	1.00983	0.730306	-1.15752	1.6624	-0.0215941	-0.641347	0.192395	1.02947	1.03839	34.1838	31.8659
101.5	0.378391	0.463032	-0.426155	1.02062	0.774175	-1.21388	1.71357	0.0428131	-0.566101	-0.880898	0.980531	-0.296734	11.4795	30.9207
102	0.22081	0.470869	-0.428385	1.03092	0.794009	-1.26318	1.73136	0.126197	-0.389419	-1.77142	0.339829	-1.27799	-11.0809	28.9862
102.5	0.148137	0.473165	-0.430623	1.04104	0.837354	-1.30498	1.7169	0.221014	-0.131581	-2.09387	-0.558092	-0.403216	-11.0606	29.8631
103	0.200324	0.469211	-0.432881	1.05062	0.856566	-1.33885	1.67202	0.317814	0.171708	-1.65778	-1.20282	1.13493	5.7132	31.6883
103.5	0.342851	0.458591	-0.435152	1.0598	0.899163	-1.36441	1.59731	0.401857	0.467286	-0.591148	-1.18784	1.04247	18.8933	36.4229
104	0.53196	0.441218	-0.437444	1.06862	0.917536	-1.38133	1.49326	0.4577	0.70056	0.712094	-0.403797	-0.617403	25.0979	40.5159
104.5	0.729142	0.417331	-0.439746	1.07695	0.95918	-1.38934	1.36118	0.473648	0.828658	1.75863	0.793881	-1.41231	40.1072	45.0976
105	0.85551	0.387474	-0.442068	1.08506	0.976474	-1.38822	1.20289	0.441397	0.826522	2.14703	1.63102	-0.15038	63.2973	46.2662
105.5	0.800715	0.352505	-0.444403	1.0926	1.01697	-1.3778	1.01983	0.35632	0.692431	1.72903	1.39515	1.33324	68.1336	45.4137
106	0.528129	0.31368	-0.446752	1.09982	1.03297	-1.35799	0.814409	0.219387	0.44803	0.674152	0.0789472	0.891913	34.5489	40.3238
106.5	0.164308	0.272735	-0.449115	1.10653	1.07202	-1.32875	0.593377	0.0437628	0.144081	-0.571339	-1.37895	-0.750758	-15.1914	35.486
107	-0.0937291	0.231866	-0.451492	1.11295	1.08651	-1.2901	0.364208	-0.152685	-0.158448	-1.50432	-1.84505	-1.26028	-40.9871	30.9862
107.5	-0.145922	0.193578	-0.45389	1.11873	1.12395	-1.24214	0.132345	-0.354759	-0.409868	-1.79868	-0.97822	-0.0816946	-29.4423	30.5959
108	-0.0415548	0.160517	-0.456296	1.12443	1.13668	-1.18504	-0.0972725	-0.546622	-0.572663	-1.4014	0.546289	1.0818	-3.70097	31.5324
108.5	0.0908407	0.135358	-0.458717	1.12946	1.17225	-1.11903	-0.321091	-0.713924	-0.629078	-0.536989	1.57574	0.740616	8.39251	34.8693
109	0.163777	0.120738	-0.461156	1.1342	1.183	-1.04438	-0.53617	-0.843761	-0.580835	0.414229	1.41332	-0.498976	1.79463	36.8591
109.5	0.176002	0.119093	-0.463602	1.13843	1.21648	-0.96149	-0.739716	-0.925451	-0.446672	1.08489	0.311015	-0.991325	-7.7743	39.3795
110	0.172153	0.132371	-0.466063	1.14238	1.22503	-0.870769	-0.928802	-0.950823	-0.25848	1.26524	-0.834431	-0.202238	-8.78953	40.045
110.5	0.185445	0.16174	-0.46854	1.14575	1.25618	-0.772712	-1.10031	-0.914588	-0.0546351	0.966847	-1.23627	0.79462	-3.83649	41.6729
111	0.217599	0.207446	-0.47103	1.14889	1.26231	-0.667881	-1.2515	-0.815611	0.126316	0.382598	-0.776301	0.748179	-3.14031	42.1793
111.5	0.260524	0.268839	-0.473534	1.15146	1.29096	-0.556873	-1.38035	-0.657744	0.251809	-0.221404	0.0467849	-0.266977	-8.15863	44.3361
112	0.3214	0.344518	-0.476052	1.15363	1.29446	-0.440368	-1.48539	-0.449149	0.301266	-0.621914	0.624326	-0.950956	-10.5015	45.9674
112.5	0.41354	0.432498	-0.478576	1.15564	1.32037	-0.319082	-1.56568	-0.201715	0.26932	-0.719353	0.689246	-0.386534	-2.36365	49.6693
113	0.530122	0.53043	-0.481114	1.15688	1.32103	-0.193767	-1.6208	0.06946	0.166026	-0.554181	0.383632	0.732273	9.79446	52.831
113.5	0.645004	0.635838	-0.483666	1.15801	1.34402	-0.0652369	-1.65099	0.347096	0.0155698	-0.260493	0.00778144	0.901835	13.1393	57.5302
114	0.744975	0.746274	-0.486232	1.15849	1.34167	0.06568	-1.65656	0.613202	-0.148791	0.0120827	-0.243552	-0.183444	4.72548	60.9759
114.5	0.845775	0.859329	-0.488804	1.15868	1.36156	0.198115	-1.63679	0.850372	-0.295171	0.165904	-0.349531	-1.07774	-1.134	65.5376
115	0.965451	0.972564	-0.491392	1.15855	1.35603	0.331179	-1.59112	1.04257	-0.395179	0.184872	-0.355941	-0.492464	7.4711	68.818
115.5	1.09419	1.08352	-0.493988	1.1579	1.37264	0.463967	-1.51955	1.17622	-0.425591	0.121713	-0.258076	0.83394	24.2918	73.2952
116	1.2065	1.18984	-0.496596	1.15706	1.36379	0.595566	-1.42248	1.24102	-0.374191	0.05511	-0.022468	1.0439	31.4071	76.4785
116.5	1.29901	1.28952	-0.499217	1.15548	1.37704	0.725059	-1.30086	1.23034	-0.24397	0.0395994	0.294352	-0.23415	25.4367	80.8259
117	1.39658	1.38102	-0.501848	1.15371	1.36471	0.851539	-1.1561	1.14201	-0.051477	0.0801857	0.513217	-1.24429	21.5166	83.923
117.5	1.51018	1.46342	-0.504483	1.15148	1.37443	0.974102	-0.99015	0.979047	0.177873	0.137414	0.450786	-0.51967	32.3083	88.1167
118	1.60631	1.5364	-0.507136	1.14904	1.35855	1.09188	-0.80537	0.749172	0.410969	0.151913	0.0817045	0.976069	46.5679	90.5965
118.5	1.64401	1.60025	-0.509791	1.14605	1.36467	1.204	-0.604751	0.464293	0.612164	0.0810023	-0.394094	1.1306	44.9414	93.5183
119	1.63575	1.6558	-0.512463	1.14273	1.34516	1.30967	-0.391572	0.140246	0.748076	-0.0712539	-0.664824	-0.314184	27.3158	94.5584
119.5	1.64714	1.70432	-0.515141	1.13899	1.3476	1.4081	-0.16903	-0.202541	0.795317	-0.240956	-0.518058	-1.33024	17.1405	96.7092
120	1.72023	1.7474	-0.517832	1.13491	1.32441	1.49856	0.0597027	-0.541558	0.741343	-0.336835	-0.0201409	-0.485232	28.5733	97.9048
120.5	1.82209	1.78687	-0.520525	1.13042	1.32315	1.58037	0.29076	-0.855718	0.582567	-0.29192	0.507523	1.01873	47.6536	100.455
121	1.89217	1.82472	-0.523229	1.12555	1.29624	1.65291	0.520291	-1.12483	0.330518	-0.0895905	0.738706	1.0946	50.2116	101.546
121.5	1.91507	1.86307	-0.525941	1.12034	1.2913	1.71561	0.745272	-1.32999	0.0128068	0.223758	0.541427	-0.317958	34.7663	103.509
122	1.92515	1.90387	-0.528659	1.1148	1.26067	1.76798	0.962659	-1.45567	-0.33129	0.542839	0.000400152	-1.26276	20.7097	103.994
122.5	1.95264	1.94854	-0.531385	1.10881	1.25204	1.80962	1.16908	-1.49103	-0.656052	0.735516	-0.622606	-0.494418	22.7958	105.519
123	1.98922	1.99757	-0.534127	1.10248	1.21779	1.84016	1.36113	-1.43086	-0.916353	0.690311	-0.952918	0.908241	32.8585	105.511
123.5	2.01135	2.05039	-0.536865	1.09598	1.20551	1.85934	1.53516	-1.27636	-1.07422	0.363982	-0.676255	1.08327	35.7955	106.316
124	2.01729	2.10532	-0.53961	1.08898	1.16766	1.86698	1.68759	-1.03527	-1.10485	-0.187561	0.17785	-0.163967	29.578	105.563
124.5	2.02503	2.15964	-0.542365	1.08164	1.15185	1.86297	1.81549	-0.721179	-0.99979	-0.808769	1.08264	-1.18939	27.331	105.918
125	2.04066	2.20967	-0.54513	1.07402	1.11051	1.84737	1.91633	-0.352724	-0.767822	-1.28578	1.27953	-0.668203	36.081	105.058
125.5	2.05312	2.25096	-0.547896	1.06606	1.09129	1.82018	1.98758	0.0473481	-0.434626	-1.4198	0.427488	0.735205	47.7283	105.507
126	2.06895	2.27855	-0.550668	1.05769	1.04665	1.78152	2.02705	0.453384	-0.0401584	-1.1059	-0.921463	1.21631	49.6441	105.032
126.5	2.13381	2.28748	-0.553442	1.04911	1.02421	1.73163	2.03273	0.839018	0.368071	-0.384143	-1.62675	0.11595	45.9638	106.427
127	2.2882	2.27319	-0.556229	1.04011	0.976395	1.6708	2.00283	1.17843	0.740128	0.552735	-0.969475	-1.19726	54.3846	107.157
127.5	2.49042	2.23189	-0.559015	1.03087	0.950883	1.59941	1.93568	1.44696	1.02736	1.40643	0.557606	-1.00354	83.9265	108.613
128	2.60783	2.16079	-0.561807	1.02143	0.899392	1.51801	1.8301	1.62422	1.19191	1.88059	1.60491	0.547505	115.563	106.521
128.5	2.51227	2.05833	-0.564599	1.0115	0.870244	1.42705	1.68605	1.69733	1.21527	1.79844	1.22765	1.47893	118.479	102.007
129	2.19589	1.92438	-0.567399	1.00142	0.815901	1.3271	1.50465	1.66087	1.09771	1.1663	-0.200504	0.463481	82.6952	92.7123
129.5	1.79905	1.76034	-0.570202	0.990978	0.784014	1.21884	1.29042	1.52202	0.865654	0.201464	-1.28197	-1.21471	38.065	82.8198
130	1.47346	1.56906	-0.573008	0.980289	0.727015	1.10299	1.04902	1.2952	0.55818	-0.767657	-1.03436	-1.29728	20.4038	71.8056
130.5	1.2415	1.35473	-0.575818	0.969229	0.692574	0.980317	0.784819	0.997257	0.216718	-1.43573	0.124633	0.350467	31.0447	62.866
131	1.01569	1.12265	-0.57863	0.957968	0.633154	0.851651	0.50281	0.648802	-0.118346	-1.61444	0.922192	1.52739	37.3255	53.1808
131.5	0.734107	0.878932	-0.581439	0.946455	0.596447	0.717849	0.209414	0.272949	-0.415342	-1.29201	0.602224	0.657317	17.1386	44.791
132	0.448838	0.630186	-0.584255	0.934563	0.534902	0.579809	-0.0882259	-0.105188	-0.649662	-0.619208	-0.319068	-1.05624	-13.7258	35.5369
132.5	0.251765	0.383125	-0.58707	0.922578	0.496207	0.438452	-0.383002	-0.461514	-0.80556	0.147138	-0.724025	-1.32507	-22.8187	28.3885
133	0.145785	0.14412	-0.589887	0.910151	0.432807	0.294723	-0.668149	-0.77489	-0.87742	0.740419	-0.176331	0.143123	-5.65453	20.6725
133.5	0.0251689	-0.0812589	-0.592701	0.897802	0.392452	0.149572	-0.939107	-1.02934	-0.866766	0.975729	0.609442	1.339	9.36084	13.7971
134	-0.205896	-0.288636	-0.595522	0.88496	0.327535	0.00396209	-1.19201	-1.21386	-0.7821	0.811163	0.645081	0.72255	-3.88245	4.46439
134.5	-0.515435	-0.475081	-0.59834	0.872007	0.285827	-0.141148	-1.42145	-1.31923	-0.634617	0.368021	-0.139742	-0.75196	-34.8063	-4.39478
135	-0.780283	-0.639138	-0.601155	0.858798	0.219767	-0.28481	-1.62188	-1.34059	-0.438902	-0.139561	-0.837084	-1.12777	-53.132	-13.8149
135.5	-0.917386	-0.780615	-0.603972	0.845237	0.177022	-0.426095	-1.78913	-1.28003	-0.214618	-0.505698	-0.620405	-0.0707595	-44.8845	-20.2313
136	-0.952704	-0.900236	-0.606791	0.831589	0.110132	-0.564096	-1.91982	-1.1452	0.0157995	-0.603605	0.311792	0.940487	-26.2972	-26.0885
136.5	-0.975603	-0.999312	-0.609601	0.817797	0.0667238	-0.697932	-2.01055	-0.949218	0.222066	-0.426495	0.93339	0.685569	-19.6825	-29.7634
137	-1.03846	-1.07954	-0.612414	0.803825	-0.000693486	-0.826769	-2.05894	-0.708944	0.37811	-0.0716959	0.546668	-0.356385	-29.0724	-34.417
137.5	-1.11458	-1.14293	-0.615223	0.789666	-0.0444263	-0.949806	-2.06449	-0.442722	0.474222	0.312948	-0.426985	-0.839379	-38.062	-37.6136
138	-1.15006	-1.19168	-0.618029	0.775187	-0.111973	-1.06629	-2.02782	-0.169908	0.508981	0.583651	-0.933402	-0.275228	-33.3484	-41.5227
138.5	-1.13673	-1.22807	-0.620837	0.76054	-0.155715	-1.17554	-1.95072	0.0900209	0.487374	0.647844	-0.449591	0.527018	-18.3961	-43.762
139	-1.12706	-1.25424	-0.623641	0.745896	-0.223106	-1.2769	-1.83603	0.319027	0.41964	0.487107	0.469217	0.604589	-9.14203	-47.3542
139.5	-1.17697	-1.27211	-0.626436	0.730869	-0.266514	-1.36981	-1.68769	0.502259	0.32024	0.154708	0.833828	-0.0173594	-14.259	-50.3774
140	-1.28158	-1.28339	-0.629226	0.715826	-0.333402	-1.45374	-1.5101	0.629855	0.206759	-0.244459	0.306088	-0.516992	-28.2939	-55.1539
140.5	-1.37641	-1.28958	-0.632019	0.700619	-0.376137	-1.52826	-1.30699	0.697812	0.0967052	-0.588285	-0.482048	-0.353861	-37.7246	-58.4527
141	-1.40148	-1.29187	-0.6348	0.685358	-0.44223	-1.59299	-1.08238	0.706781	0.0033485	-0.779207	-0.680147	0.168692	-36.4758	-61.972
141.5	-1.3571	-1.29095	-0.637582	0.669774	-0.483998	-1.64764	-0.840884	0.661072	-0.0680131	-0.7707	-0.144162	0.406629	-28.555	-63.1253
142	-1.29486	-1.28702	-0.640355	0.654183	-0.548977	-1.69197	-0.587523	0.568501	-0.117941	-0.570433	0.478724	0.156679	-22.9911	-64.8253
142.5	-1.26084	-1.27989	-0.643122	0.6384	-0.589477	-1.72583	-0.327413	0.439699	-0.151136	-0.233107	0.51191	-0.212734	-22.9281	-65.1445
143	-1.25247	-1.26913	-0.645881	0.622577	-0.653034	-1.74914	-0.065671	0.287723	-0.173801	0.157751	-0.0220113	-0.27646	-25.1795	-66.6899
143.5	-1.23354	-1.25432	-0.648638	0.606575	-0.692001	-1.7619	0.192512	0.127087	-0.191039	0.508967	-0.492734	-0.0376444	-23.8881	-66.8465
144	-1.18454	-1.23508	-0.651382	0.590674	-0.753867	-1.76417	0.441991	-0.0277839	-0.206422	0.734357	-0.399882	0.170465	-18.6602	-68.0087
144.5	-1.12826	-1.21122	-0.654123	0.574505	-0.791023	-1.75608	0.677244	-0.164055	-0.220435	0.773629	0.104341	0.146486	-13.0951	-67.9989
145	-1.10481	-1.18279	-0.656856	0.558295	-0.850972	-1.73783	0.893183	-0.271129	-0.231713	0.610752	0.451314	0.00998309	-12.2498	-69.6572
145.5	-1.12787	-1.15014	-0.659578	0.542002	-0.886058	-1.7097	1.08647	-0.340815	-0.240344	0.286394	0.308972	-0.0619041	-16.7456	-70.6086
146	-1.16942	-1.11394	-0.662293	0.525577	-0.943838	-1.67201	1.25452	-0.368154	-0.24468	-0.106578	-0.103315	-0.0825157	-24.0329	-72.9356
146.5	-1.18301	-1.07505	-0.665	0.509217	-0.976633	-1.62515	1.39514	-0.351362	-0.237509	-0.445507	-0.318773	-0.0946632	-28.1024	-73.5753
147	-1.14508	-1.03449	-0.66769	0.492712	-1.03203	-1.56956	1.50665	-0.292855	-0.212622	-0.623736	-0.165915	-0.0147118	-25.7977	-74.6094
147.5	-1.07313	-0.993403	-0.670379	0.476237	-1.06233	-1.50574	1.58738	-0.200116	-0.170072	-0.59566	0.0869194	0.156281	-18.9747	-73.6776
148	-0.999595	-0.953009	-0.673053	0.459715	-1.11514	-1.43421	1.63616	-0.0837294	-0.111491	-0.38759	0.124187	0.192377	-13.9278	-73.5955
148.5	-0.937151	-0.914718	-0.675717	0.443148	-1.14277	-1.35556	1.65248	0.0440934	-0.0377734	-0.0854931	-0.0392072	-0.0535052	-12.5031	-72.1962
149	-0.874456	-0.880146	-0.678371	0.426439	-1.19279	-1.2704	1.63645	0.170213	0.0488371	0.196038	-0.133027	-0.311729	-11.0834	-72.0952
149.5	-0.804046	-0.851098	-0.681012	0.409806	-1.2176	-1.17937	1.58885	0.281249	0.14217	0.355659	-0.00367177	-0.181751	-4.85668	-71.0216
150	-0.744594	-0.829451	-0.683642	0.393101	-1.26471	-1.08315	1.51116	0.365685	0.23564	0.34806	0.204404	0.252188	2.78741	-71.7028
150.5	-0.730338	-0.816947	-0.686257	0.376459	-1.2865	-0.98241	1.40437	0.414825	0.326514	0.197789	0.228679	0.403022	3.96486	-71.8956
151	-0.770709	-0.814951	-0.688859	0.359802	-1.33058	-0.877875	1.27032	0.423578	0.410265	-0.0156524	0.00507108	-0.00135025	-4.45272	-73.948
151.5	-0.831098	-0.824251	-0.691449	0.343152	-1.34927	-0.770243	1.11317	0.391391	0.477065	-0.192023	-0.251743	-0.444274	-13.7422	-74.9412
152	-0.867361	-0.844946	-0.694027	0.326531	-1.39015	-0.660243	0.937562	0.32133	0.515371	-0.255887	-0.298814	-0.311251	-15.0958	-76.8907
152.5	-0.869387	-0.876369	-0.69659	0.309981	-1.40564	-0.54858	0.7486	0.219644	0.513307	-0.185854	-0.106143	0.252126	-8.99145	-77.2519
153	-0.866648	-0.917047	-0.699138	0.29342	-1.44327	-0.435972	0.551565	0.095115	0.460839	-0.0176283	0.151519	0.507159	-5.36396	-78.7244
153.5	-0.894187	-0.964704	-0.701666	0.276896	-1.45543	-0.323115	0.351392	-0.0423401	0.351099	0.17236	0.28334	0.0958905	-9.91575	-79.1582
154	-0.956986	-1.01639	-0.704187	0.26037	-1.48974	-0.210701	0.152488	-0.181881	0.18542	0.303032	0.238464	-0.462398	-19.0913	-81.1248
154.5	-1.03372	-1.06877	-0.706683	0.243894	-1.49853	-0.099393	-0.0405412	-0.31172	-0.0245129	0.325091	0.0773115	-0.4307	-24.6579	-82.0735
155	-1.10971	-1.11854	-0.709169	0.227599	-1.52944	0.0101575	-0.223375	-0.420924	-0.259631	0.233375	-0.138765	0.170953	-26.3922	-84.3394
155.5	-1.18833	-1.16272	-0.711635	0.211187	-1.53482	0.117346	-0.392419	-0.500761	-0.495797	0.0630129	-0.338694	0.571169	-30.1141	-85.3264
156	-1.26765	-1.1988	-0.714087	0.194935	-1.5623	0.22158	-0.544678	-0.544878	-0.705633	-0.124325	-0.375738	0.237698	-39.1743	-87.2142
156.5	-1.32355	-1.22487	-0.716518	0.178675	-1.56424	0.322303	-0.67767	-0.549729	-0.86331	-0.264024	-0.117172	-0.424233	-46.7592	-87.1757
157	-1.33005	-1.23961	-0.71893	0.16269	-1.58829	0.419006	-0.789833	-0.515288	-0.946906	-0.312664	0.343731	-0.560097	-45.0658	-87.4678
157.5	-1.29534	-1.24242	-0.721325	0.146536	-1.58678	0.511202	-0.880548	-0.445128	-0.940123	-0.260764	0.638123	0.0427072	-34.961	-85.8039
158	-1.26395	-1.23349	-0.723702	0.130617	-1.60737	0.598449	-0.949952	-0.345745	-0.835997	-0.133957	0.408072	0.617872	-28.4171	-85.0468
158.5	-1.26614	-1.21384	-0.726058	0.114855	-1.60243	0.680358	-0.998649	-0.225718	-0.640514	0.0159631	-0.280709	0.376305	-32.8659	-82.9831
159	-1.27077	-1.18527	-0.728395	0.0991415	-1.61959	0.756574	-1.02755	-0.094732	-0.369516	0.129632	-0.857925	-0.400471	-41.1283	-81.9124
159.5	-1.21315	-1.15029	-0.730715	0.0835163	-1.61124	0.826782	-1.03694	0.0380715	-0.0487289	0.164981	-0.715139	-0.636371	-36.6578	-79.0637
160	-1.08283	-1.11194	-0.733005	0.0679972	-1.62502	0.89071	-1.02742	0.16394	0.291292	0.108364	0.147341	0.0339201	-16.8188	-76.9851
160.5	-0.963527	-1.07352	-0.735281	0.0528256	-1.61331	0.948141	-1.00143	0.272283	0.614459	-0.0333957	0.97202	0.638805	1.15119	-73.925
161	-0.941671	-1.03822	-0.737529	0.0374452	-1.62377	0.998895	-0.961364	0.354308	0.886039	-0.210063	0.95039	0.306333	0.00686371	-72.9476
161.5	-1.00139	-1.00884	-0.739763	0.0223861	-1.60875	1.04283	-0.907656	0.406306	1.08022	-0.326935	0.0549112	-0.432767	-14.0921	-71.3662
162	-1.04488	-0.987469	-0.741969	0.00729725	-1.61591	1.07986	-0.840632	0.426982	1.17667	-0.297593	-0.927127	-0.498198	-22.3062	-70.8375
162.5	-0.995472	-0.975196	-0.744152	-0.00739317	-1.59769	1.10994	-0.761294	0.41661	1.16191	-0.0895462	-1.1053	0.148028	-14.6889	-68.2875
163	-0.87037	-0.971969	-0.746313	-0.0220358	-1.60168	1.13305	-0.671247	0.377629	1.03244	0.255071	-0.298328	0.51791	-0.235066	-66.2985
163.5	-0.762111	-0.976551	-0.74845	-0.036626	-1.5803	1.14922	-0.573848	0.313045	0.793758	0.616102	0.766056	0.0803659	7.79322	-63.256
164	-0.749318	-0.986697	-0.750562	-0.0509733	-1.58122	1.15852	-0.47281	0.227665	0.462549	0.841791	1.14044	-0.443045	5.32363	-62.5051
164.5	-0.840134	-0.999491	-0.752643	-0.0651463	-1.5568	1.16104	-0.369942	0.129544	0.0670057	0.814707	0.530876	-0.217173	-2.58536	-61.9115
165	-0.988465	-1.01176	-0.754707	-0.0790548	-1.55475	1.15691	-0.266078	0.0289412	-0.355238	0.49805	-0.493026	0.373025	-14.4592	-63.6159
165.5	-1.13287	-1.02047	-0.756745	-0.093101	-1.52741	1.14632	-0.161614	-0.0640426	-0.761009	-0.0479831	-1.05128	0.330662	-29.862	-64.4545
166	-1.2211	-1.02312	-0.758749	-0.106695	-1.52248	1.12943	-0.0567782	-0.140052	-1.10486	-0.672042	-0.716963	-0.298225	-42.4741	-66.0985
166.5	-1.23419	-1.01802	-0.760731	-0.120131	-1.49236	1.10648	0.0473971	-0.191529	-1.3423	-1.17483	0.174306	-0.46838	-42.2207	-65.557
167	-1.19866	-1.00442	-0.762686	-0.133338	-1.4847	1.0777	0.149281	-0.213902	-1.43827	-1.37758	0.870182	0.155694	-31.5762	-65.1858
167.5	-1.15934	-0.982528	-0.764617	-0.14651	-1.45193	1.04337	0.246458	-0.207168	-1.37494	-1.19068	0.825919	0.575888	-24.4421	-62.7444
168	-1.12131	-0.953321	-0.766514	-0.159396	-1.44168	1.00375	0.33637	-0.174354	-1.15136	-0.642584	0.121508	0.0592078	-28.1505	-60.8262
168.5	-1.03854	-0.918392	-0.768385	-0.172154	-1.40639	0.959149	0.417053	-0.119987	-0.783485	0.125985	-0.655095	-0.610139	-30.1345	-56.9369
169	-0.878513	-0.879817	-0.770227	-0.184612	-1.39371	0.909887	0.48682	-0.0505003	-0.305806	0.895287	-0.913841	-0.337052	-16.6375	-53.6964
169.5	-0.683466	-0.84011	-0.77204	-0.196925	-1.35607	0.85628	0.543345	0.0247491	0.228835	1.42458	-0.498078	0.494991	7.49663	-49.369
170	-0.541449	-0.802112	-0.773822	-0.208975	-1.34111	0.79867	0.584272	0.0946044	0.755434	1.53094	0.272243	0.57901	22.9126	-47.4188
170.5	-0.500077	-0.768761	-0.77557	-0.220849	-1.30127	0.737395	0.608936	0.150864	1.20877	1.17156	0.885081	-0.213648	22.5127	-45.9889
171	-0.547543	-0.742721	-0.777293	-0.232556	-1.28421	0.672813	0.617491	0.187618	1.53157	0.455123	0.923708	-0.681257	14.13	-47.4922
171.5	-0.648366	-0.725983	-0.778982	-0.243951	-1.24236	0.605284	0.610808	0.202243	1.68489	-0.387918	0.31467	-0.132284	6.32398	-48.9028
172	-0.772718	-0.719546	-0.780638	-0.255142	-1.22335	0.535168	0.590179	0.194478	1.64925	-1.08592	-0.597641	0.594407	-3.79203	-51.8752
172.5	-0.877437	-0.723225	-0.782262	-0.266097	-1.17964	0.462829	0.558349	0.16657	1.42272	-1.41233	-1.18603	0.448252	-17.6764	-53.0635
173	-0.901668	-0.735604	-0.783859	-0.276768	-1.15887	0.388631	0.518744	0.122514	1.02375	-1.26108	-0.943502	-0.320499	-26.9093	-54.2154
173.5	-0.816623	-0.754148	-0.785416	-0.287243	-1.11349	0.312948	0.473548	0.0665702	0.494404	-0.685446	0.0688801	-0.61819	-20.7344	-52.8072
174	-0.674963	-0.77549	-0.786942	-0.29741	-1.09114	0.236143	0.424455	0.00330508	-0.107118	0.122322	1.14362	-0.063393	-4.16161	-52.0524
174.5	-0.59161	-0.795872	-0.788432	-0.307499	-1.04429	0.158587	0.372607	-0.0640543	-0.719466	0.884078	1.38221	0.532952	4.06693	-50.7466
175	-0.64073	-0.81163	-0.789888	-0.317201	-1.02055	0.0806401	0.319348	-0.131887	-1.27611	1.33775	0.494917	0.382567	-9.20411	-52.1521
175.5	-0.782441	-0.819661	-0.791313	-0.326748	-0.972359	0.00267088	0.267505	-0.192874	-1.70269	1.34065	-0.817305	-0.21892	-34.1139	-53.518
176	-0.916883	-0.817828	-0.792703	-0.336028	-0.947418	-0.0749623	0.219954	-0.240354	-1.93842	0.888965	-1.46664	-0.477277	-51.6489	-56.3679
176.5	-0.978863	-0.805247	-0.794053	-0.345125	-0.89812	-0.151903	0.177964	-0.271395	-1.94917	0.106102	-0.933813	-0.151691	-52.1121	-57.479
177	-0.973911	-0.782359	-0.79537	-0.353934	-0.872137	-0.227792	0.142361	-0.284527	-1.72835	-0.774873	0.314538	0.320389	-42.5969	-59.0202
177.5	-0.947435	-0.750762	-0.796645	-0.362455	-0.821896	-0.30229	0.113024	-0.279461	-1.29638	-1.47239	1.24059	0.392687	-35.8523	-58.554
178	-0.92504	-0.712886	-0.797887	-0.370783	-0.795081	-0.375034	0.0890163	-0.258084	-0.702556	-1.74565	1.11723	-0.0191625	-38.5799	-58.4804
178.5	-0.880476	-0.671629	-0.799093	-0.378751	-0.744109	-0.445696	0.0689876	-0.224617	-0.0204583	-1.47611	0.11977	-0.43708	-43.3716	-56.021
179	-0.761482	-0.630051	-0.800259	-0.386566	-0.71662	-0.513946	0.0516522	-0.184132	0.662807	-0.712069	-0.874129	-0.314617	-37.8788	-53.3226
179.5	-0.551278	-0.591099	-0.801384	-0.393972	-0.665081	-0.57944	0.0349803	-0.141548	1.26185	0.332258	-1.06531	0.256529	-17.6112	-48.1787
180	-0.305923	-0.557373	-0.802477	-0.40129	-0.637122	-0.641872	0.0169427	-0.101315	1.70178	1.33157	-0.396946	0.538991	6.08261	-44.1099
180.5	-0.130239	-0.530969	-0.803522	-0.408184	-0.585207	-0.700918	-0.00571685	-0.0693031	1.92293	1.94018	0.451888	0.0634834	18.0563	-40.1957
181	-0.0966128	-0.513394	-0.804535	-0.415046	-0.556952	-0.756287	-0.0355353	-0.0487557	1.89761	1.93301	0.773516	-0.564768	14.2225	-39.931
181.5	-0.197472	-0.505488	-0.805503	-0.421426	-0.504805	-0.807677	-0.0726387	-0.0366954	1.64236	1.31164	0.459298	-0.392323	3.72229	-40.7645
182	-0.3818	-0.507287	-0.806431	-0.427687	-0.476424	-0.854812	-0.1164	-0.0284026	1.20376	0.289368	-0.093863	0.383155	-9.27734	-44.2636
182.5	-0.586801	-0.51783	-0.80732	-0.433616	-0.42425	-0.897417	-0.165255	-0.0179149	0.651	-0.779191	-0.40389	0.632495	-26.4536	-46.7177
183	-0.750961	-0.535085	-0.808165	-0.439232	-0.395919	-0.935241	-0.217928	0.00139367	0.0653461	-1.5268	-0.296209	-0.0311627	-45.8392	-49.3796
183.5	-0.826064	-0.556099	-0.808974	-0.444799	-0.343872	-0.968053	-0.272162	0.0361033	-0.476443	-1.7094	0.025268	-0.642613	-56.0495	-48.9877
184	-0.806711	-0.577373	-0.809733	-0.449872	-0.315739	-0.995625	-0.326477	0.08871	-0.913995	-1.31008	0.20941	-0.352881	-51.7628	-47.9384
184.5	-0.731835	-0.595379	-0.81045	-0.45478	-0.263969	-1.01777	-0.379556	0.158535	-1.2097	-0.53094	0.087953	0.398679	-40.22	-44.384
185	-0.654538	-0.607055	-0.811127	-0.45934	-0.236215	-1.03432	-0.429688	0.242336	-1.35112	0.299577	-0.197915	0.568955	-34.0886	-41.645
185.5	-0.603525	-0.610205	-0.811763	-0.463735	-0.184867	-1.0451	-0.47527	0.334323	-1.34813	0.863156	-0.337175	-0.031636	-35.002	-37.9433
186	-0.57372	-0.603748	-0.812354	-0.467922	-0.157611	-1.05002	-0.514759	0.426893	-1.22646	0.981416	-0.122743	-0.542872	-34.8643	-36.0293
186.5	-0.552339	-0.587794	-0.812896	-0.471674	-0.106851	-1.04897	-0.546412	0.512073	-1.01831	0.684389	0.343711	-0.291399	-27.5633	-33.4233
187	-0.545553	-0.563546	-0.813399	-0.475241	-0.0802465	-1.04189	-0.568734	0.581252	-0.757283	0.176177	0.664332	0.311362	-20.0367	-32.4343
187.5	-0.562748	-0.533052	-0.813856	-0.478575	-0.0302167	-1.02876	-0.580259	0.62594	-0.473415	-0.270178	0.461432	0.43754	-21.5034	-30.3078
188	-0.581681	-0.49885	-0.814261	-0.481603	-0.00438174	-1.00957	-0.579587	0.638585	-0.189587	-0.441128	-0.237624	-0.00643425	-31.2559	-28.9977
188.5	-0.549501	-0.463625	-0.814626	-0.484582	0.044787	-0.984375	-0.564837	0.6137	0.0793848	-0.276064	-0.915806	-0.366002	-36.6842	-25.5231
189	-0.433013	-0.429921	-0.814944	-0.487024	0.0697074	-0.95324	-0.53446	0.547664	0.325722	0.108157	-0.955716	-0.213664	-29.078	-22.2171
189.5	-0.267104	-0.399903	-0.815213	-0.489375	0.117919	-0.916277	-0.488438	0.437427	0.543931	0.472369	-0.212624	0.146732	-12.0355	-17.2189
190	-0.138067	-0.375142	-0.815439	-0.491451	0.141808	-0.873648	-0.4275	0.282084	0.72829	0.582727	0.799675	0.240641	1.67186	-13.9961
190.5	-0.1188	-0.356434	-0.815616	-0.493336	0.18895	-0.825533	-0.352979	0.0850327	0.876393	0.339578	1.29697	0.0453402	3.44797	-10.8563
191	-0.221094	-0.343687	-0.815741	-0.494821	0.211695	-0.772154	-0.26637	-0.146267	0.982216	-0.174712	0.843739	-0.129709	-7.62125	-10.2796
191.5	-0.38305	-0.335892	-0.815819	-0.496052	0.257638	-0.71378	-0.167907	-0.398919	1.03696	-0.723739	-0.252741	-0.083583	-23.5794	-8.95229
192	-0.510646	-0.331149	-0.815853	-0.497182	0.279165	-0.650709	-0.0583789	-0.657069	1.02756	-1.03567	-1.2021	0.039694	-35.7054	-8.12
192.5	-0.52874	-0.326756	-0.815837	-0.498024	0.323823	-0.583277	0.0610958	-0.903518	0.936518	-0.933887	-1.33391	0.0350398	-37.1198	-4.45347
193	-0.419871	-0.319391	-0.815764	-0.498522	0.344014	-0.511848	0.188608	-1.12144	0.748059	-0.424455	-0.560304	-0.0590008	-27.1065	-0.351734
193.5	-0.236094	-0.305382	-0.815648	-0.499007	0.387286	-0.43683	0.320143	-1.29559	0.456131	0.301132	0.595656	-0.0423149	-10.2904	5.83945
194	-0.0738881	-0.281032	-0.815481	-0.49887	0.406065	-0.358653	0.450956	-1.41263	0.0688436	0.949361	1.37708	0.109619	2.7629	10.448
194.5	-0.018208	-0.242955	-0.815267	-0.498884	0.447905	-0.277777	0.576836	-1.46107	-0.386649	1.25437	1.27209	0.14362	2.55179	14.9289
195	-0.0869689	-0.188462	-0.814994	-0.498426	0.465202	-0.194691	0.694161	-1.4316	-0.864163	1.0926	0.303641	-0.100881	-13.4915	16.581
195.5	-0.207901	-0.116016	-0.814678	-0.497776	0.505526	-0.109907	0.800789	-1.31651	-1.29989	0.539949	-0.929828	-0.28698	-34.0931	18.5889
196	-0.271824	-0.0256616	-0.814303	-0.497158	0.521248	-0.0239418	0.895073	-1.1121	-1.62493	-0.17565	-1.59509	-0.0191792	-44.4603	19.7738
196.5	-0.214902	0.0807575	-0.81388	-0.49601	0.559989	0.0626458	0.974425	-0.821811	-1.78039	-0.78663	-1.17335	0.39494	-38.8007	23.6411
197	-0.0472721	0.199693	-0.813405	-0.494821	0.574131	0.149311	1.03555	-0.45666	-1.72551	-1.09234	0.136386	0.256575	-24.3079	28.0378
197.5	0.175214	0.326229	-0.812881	-0.493353	0.611242	0.235483	1.07372	-0.0354611	-1.44514	-1.03186	1.42559	-0.390525	-8.63189	34.9158
198	0.395322	0.454511	-0.812297	-0.491614	0.623715	0.320594	1.0845	0.417254	-0.95702	-0.685903	1.68271	-0.59286	5.89078	40.9128
198.5	0.576765	0.578177	-0.811665	-0.489697	0.659179	0.404071	1.06554	0.873702	-0.313203	-0.220399	0.628074	0.128679	19.2428	47.7057
199	0.71304	0.690809	-0.810974	-0.487652	0.669965	0.485353	1.01586	1.30489	0.407584	0.195319	-0.950791	0.850725	26.8028	52.5094
199.5	0.829345	0.786403	-0.810231	-0.485333	0.703699	0.563881	0.935235	1.68204	1.10922	0.45306	-1.77304	0.40318	27.8171	57.8719
200	0.965455	0.859826	-0.809432	-0.482809	0.712779	0.639104	0.823977	1.9783	1.69392	0.534479	-1.14296	-0.783332	31.6402	61.4932
200.5	1.12687	0.907206	-0.808581	-0.480117	0.744804	0.710509	0.683387	2.1712	2.07808	0.497777	0.408912	-0.989298	50.1667	65.618
201	1.24622	0.926225	-0.807672	-0.477245	0.752144	0.777579	0.515918	2.2442	2.20347	0.426686	1.5531	0.290453	74.7863	67.0725
201.5	1.22744	0.916334	-0.806711	-0.474233	0.782423	0.839836	0.325188	2.1872	2.04396	0.373347	1.32865	1.30731	79.0697	67.5701
202	1.05526	0.878883	-0.805699	-0.470956	0.788014	0.896828	0.115946	1.99821	1.61364	0.336521	0.010138	0.475898	49.5854	64.6825
202.5	0.841457	0.817116	-0.804631	-0.467513	0.816541	0.948136	-0.104104	1.68829	0.973687	0.292322	-1.13634	-1.09508	11.1131	61.944
203	0.709316	0.735989	-0.803506	-0.463945	0.820386	0.99338	-0.326156	1.27802	0.218374	0.204571	-1.1116	-1.11419	-3.04656	58.0227
203.5	0.647723	0.64177	-0.802327	-0.4601	0.847195	1.03222	-0.543859	0.788794	-0.550176	0.0219831	-0.150831	0.427962	6.10856	55.4089
204	0.546852	0.541496	-0.801089	-0.456193	0.849303	1.06434	-0.751181	0.24607	-1.23037	-0.258906	0.700738	1.30794	6.70654	51.0327
204.5	0.352507	0.442383	-0.799798	-0.452115	0.874381	1.08949	-0.941182	-0.317696	-1.72684	-0.555019	0.727441	0.355452	-17.4588	47.3272
205	0.131815	0.351302	-0.798453	-0.447752	0.874779	1.10745	-1.10703	-0.868141	-1.9729	-0.745577	0.111957	-1.00023	-48.4589	42.7389
205.5	-0.00707675	0.274346	-0.797046	-0.443504	0.898149	1.11807	-1.24256	-1.37372	-1.94842	-0.742967	-0.438305	-0.911831	-58.8215	40.8246
206	-0.0176602	0.216515	-0.795586	-0.438857	0.896843	1.12121	-1.34222	-1.80438	-1.67186	-0.518987	-0.424272	0.382419	-45.9568	39.6128
206.5	0.0518757	0.181449	-0.794073	-0.434148	0.918529	1.11682	-1.40317	-2.13705	-1.19633	-0.142269	-0.00566423	1.015	-30.6236	41.0727
207	0.136708	0.171221	-0.792501	-0.429353	0.915598	1.10487	-1.42397	-2.35431	-0.599542	0.2576	0.314262	0.252325	-27.5501	41.9442
207.5	0.21082	0.186187	-0.790869	-0.424455	0.935623	1.0854	-1.40406	-2.44564	0.0254081	0.53873	0.233715	-0.712615	-29.5876	44.1438
208	0.278986	0.22497	-0.789185	-0.419291	0.931064	1.05849	-1.34471	-2.40814	0.589196	0.603659	-0.101857	-0.651562	-25.3234	45.0459
208.5	0.34768	0.284645	-0.787439	-0.413978	0.949504	1.02427	-1.24801	-2.24577	1.02027	0.442302	-0.326672	0.16368	-14.2185	47.118
209	0.422628	0.361138	-0.785638	-0.408673	0.943377	0.982925	-1.11625	-1.96661	1.27523	0.14584	-0.21917	0.673457	-4.75516	48.03
209.5	0.500783	0.449737	-0.783779	-0.403194	0.960236	0.934673	-0.953861	-1.5872	1.33724	-0.156235	0.0933634	0.332473	-2.26281	50.3013
210	0.584507	0.545556	-0.78186	-0.397747	0.952585	0.879812	-0.765727	-1.12837	1.2191	-0.335758	0.337123	-0.337961	-3.58806	51.612
210.5	0.675223	0.643832	-0.779881	-0.39186	0.967963	0.818648	-0.558151	-0.614701	0.960901	-0.321596	0.326582	-0.560722	-1.52818	54.5099
211	0.769941	0.740085	-0.777848	-0.386083	0.958821	0.751554	-0.337618	-0.072786	0.617777	-0.127788	0.0649958	-0.145099	5.45927	56.4786
211.5	0.858665	0.830251	-0.775753	-0.380246	0.97277	0.678937	-0.110522	0.468262	0.244361	0.142692	-0.299569	0.405614	13.4655	59.6823
212	0.938369	0.910802	-0.773604	-0.374286	0.96221	0.60124	0.117042	0.981294	-0.106331	0.358677	-0.506146	0.522274	17.8237	61.3696
212.5	1.00833	0.978821	-0.771391	-0.368352	0.974768	0.518954	0.339263	1.44182	-0.390402	0.413366	-0.33512	0.0534972	18.764	63.7867
213	1.05525	1.03197	-0.769118	-0.362191	0.96285	0.432596	0.54904	1.82442	-0.584003	0.249567	0.148639	-0.60095	18.5085	64.2334
213.5	1.08022	1.0684	-0.766789	-0.355963	0.974093	0.342717	0.742201	2.11253	-0.678083	-0.0697971	0.632874	-0.542133	23.9165	65.1708
214	1.07313	1.08671	-0.764398	-0.349581	0.960889	0.249888	0.915019	2.29379	-0.680237	-0.411484	0.692265	0.305582	32.1173	64.1491
214.5	1.01843	1.08599	-0.761951	-0.343375	0.970884	0.15471	1.064	2.35982	-0.609757	-0.629157	0.160588	0.828376	31.9414	63.6831
215	0.938642	1.06583	-0.759443	-0.336863	0.956455	0.0578066	1.18734	2.30991	-0.489511	-0.606689	-0.599809	0.241166	19.6036	61.7062
215.5	0.894797	1.02634	-0.756873	-0.330443	0.96524	-0.0401861	1.28369	2.14925	-0.341786	-0.317545	-0.951145	-0.732178	9.28023	61.213
216	0.929224	0.96809	-0.754249	-0.323892	0.949663	-0.138617	1.35234	1.88735	-0.187685	0.151128	-0.549351	-0.757156	16.2953	59.9044
216.5	1.00705	0.892096	-0.75156	-0.317408	0.957368	-0.236824	1.39269	1.53727	-0.0445799	0.625159	0.321182	0.25375	37.3705	59.6422
217	1.02953	0.799811	-0.748808	-0.310734	0.940698	-0.334154	1.4046	1.11539	0.0760559	0.910299	0.972086	0.936486	49.6191	56.9189
217.5	0.920671	0.693199	-0.746003	-0.304189	0.947336	-0.429938	1.38881	0.641782	0.169993	0.874855	0.897924	0.355849	37.9642	53.5084
218	0.693634	0.574762	-0.743133	-0.297464	0.929637	-0.523521	1.34679	0.139418	0.239041	0.506378	0.17061	-0.677462	10.903	47.1786
218.5	0.432778	0.447494	-0.7402	-0.290792	0.935291	-0.614251	1.28107	-0.365316	0.292735	-0.0684783	-0.649047	-0.735905	-9.54891	41.3947
219	0.208635	0.314735	-0.737213	-0.284181	0.916639	-0.701493	1.19449	-0.846339	0.339592	-0.642531	-1.0044	0.17117	-15.9427	34.7358
219.5	0.038154	0.18002	-0.734161	-0.277456	0.921374	-0.784636	1.08891	-1.28115	0.379134	-1.01355	-0.724182	0.722184	-17.0353	30.2508
220	-0.0805598	0.0470138	-0.731048	-0.270637	0.901849	-0.863079	0.966454	-1.6495	0.4053	-1.04594	0.00299151	0.277131	-20.0647	25.7331
220.5	-0.148705	-0.0804535	-0.727875	-0.263928	0.905698	-0.936261	0.830119	-1.93505	0.402498	-0.724058	0.777205	-0.403757	-20.7541	23.5896
221	-0.181932	-0.198337	-0.724644	-0.257273	0.885315	-1.00364	0.683188	-2.12556	0.354232	-0.15264	1.15095	-0.449312	-16.3938	20.9692
221.5	-0.222782	-0.302543	-0.721345	-0.250556	0.888362	-1.06473	0.529046	-2.21386	0.248127	0.477143	0.795165	-0.00134119	-13.1398	19.6529
222	-0.309911	-0.389345	-0.717994	-0.243922	0.867222	-1.11906	0.370505	-2.19833	0.0825503	0.952431	-0.242381	0.286765	-19.6221	16.617
222.5	-0.428843	-0.455936	-0.714577	-0.237099	0.86948	-1.16621	0.210383	-2.0795	-0.123165	1.12536	-1.33104	0.246846	-31.9952	14.3751
223	-0.525815	-0.500885	-0.711096	-0.230395	0.847587	-1.20582	0.0519988	-1.8615	-0.337752	0.94775	-1.57553	0.068649	-40.061	11.0095
223.5	-0.56485	-0.524291	-0.70756	-0.223771	0.849132	-1.23756	-0.102298	-1.55484	-0.526944	0.467382	-0.562492	-0.200818	-37.9977	9.41367
224	-0.556579	-0.527643	-0.703959	-0.217315	0.826518	-1.26119	-0.250888	-1.17369	-0.654511	-0.17394	1.12051	-0.387112	-28.7557	7.18076
224.5	-0.553947	-0.513502	-0.700296	-0.210632	0.827353	-1.27647	-0.392467	-0.735883	-0.691796	-0.784734	2.12805	-0.138436	-19.7531	6.46016
225	-0.603689	-0.485161	-0.696575	-0.204159	0.804049	-1.28325	-0.525799	-0.261728	-0.623611	-1.17716	1.44285	0.434212	-20.9117	4.59235
225.5	-0.684984	-0.446372	-0.69279	-0.197651	0.804222	-1.28144	-0.649233	0.227395	-0.452072	-1.22236	-0.583006	0.563064	-34.8387	4.43053
226	-0.694902	-0.401096	-0.688947	-0.191141	0.780258	-1.27101	-0.761162	0.709117	-0.198411	-0.895968	-2.31935	-0.122715	-49.5933	4.45457
226.5	-0.524685	-0.35324	-0.685043	-0.184855	0.779781	-1.25197	-0.860923	1.16032	0.0997455	-0.292559	-2.19537	-0.780591	-42.1145	7.81531
227	-0.185602	-0.306378	-0.681073	-0.178406	0.755175	-1.22441	-0.94878	1.55765	0.393045	0.396738	-0.169526	-0.406385	-5.05972	11.5257
227.5	0.144505	-0.263526	-0.677047	-0.172182	0.754031	-1.18848	-1.02692	1.8762	0.623982	0.932058	2.05783	0.563099	37.4258	16.0732
228	0.259332	-0.227014	-0.672955	-0.166081	0.728775	-1.14438	-1.09742	2.09486	0.744045	1.12986	2.54116	0.794293	49.5216	16.9515
228.5	0.113976	-0.198463	-0.668807	-0.159925	0.726983	-1.09238	-1.16026	2.20176	0.730506	0.950754	0.88722	-0.0220384	23.9381	16.1383
229	-0.143797	-0.17876	-0.664597	-0.153835	0.701074	-1.03281	-1.21435	2.19237	0.585349	0.494288	-1.43032	-0.771733	-12.9456	12.4881
229.5	-0.310846	-0.167993	-0.66032	-0.147955	0.698633	-0.96603	-1.25746	2.07002	0.337044	-0.0421236	-2.40224	-0.462662	-28.331	10.4292
230	-0.306961	-0.165383	-0.655985	-0.142083	0.672068	-0.892483	-1.28741	1.84363	0.0323435	-0.45304	-1.29812	0.411105	-17.6998	8.57024
230.5	-0.218419	-0.169304	-0.651593	-0.136375	0.668984	-0.812644	-1.30319	1.52469	-0.277251	-0.616387	0.740225	0.625585	-2.37951	8.95365
231	-0.173983	-0.177427	-0.647138	-0.130664	0.641744	-0.727042	-1.3038	1.12885	-0.539045	-0.521061	1.88497	0.00765024	-2.05537	8.13123
231.5	-0.217305	-0.18694	-0.642618	-0.124922	0.637989	-0.636257	-1.28808	0.676084	-0.703621	-0.256138	1.30648	-0.48277	-15.1385	8.08609
232	-0.292595	-0.194757	-0.638048	-0.119452	0.610064	-0.540891	-1.25442	0.189766	-0.737236	0.0343415	-0.22607	-0.252437	-29.3439	6.69065
232.5	-0.318173	-0.197692	-0.633409	-0.114168	0.60561	-0.4416	-1.19967	-0.303282	-0.632001	0.221134	-1.23107	0.232988	-34.9546	7.07548
233	-0.268883	-0.192652	-0.628714	-0.108861	0.577011	-0.339053	-1.12099	-0.776786	-0.406613	0.229482	-0.966518	0.278365	-32.6268	7.05109
233.5	-0.187759	-0.176898	-0.623951	-0.103735	0.571836	-0.23396	-1.01822	-1.20798	-0.10021	0.0590323	0.0169811	-0.057129	-26.9734	8.73472
234	-0.127725	-0.148323	-0.619135	-0.0986822	0.542523	-0.127043	-0.891604	-1.57589	0.233165	-0.203438	0.655995	-0.182301	-22.6641	9.26573
234.5	-0.101385	-0.105603	-0.614256	-0.0937589	0.536642	-0.0190357	-0.740714	-1.86232	0.53032	-0.422452	0.470931	0.0108264	-22.0382	11.1067
235	-0.070714	-0.0481118	-0.609319	-0.0889336	0.506579	0.089313	-0.56571	-2.05325	0.732898	-0.472773	-0.103224	0.0920415	-24.7238	12.2814
235.5	0.0180555	0.024374	-0.604319	-0.0843202	0.499945	0.197247	-0.368251	-2.1399	0.800385	-0.29357	-0.339313	-0.0607418	-23.9284	15.78
236	0.17834	0.111942	-0.599266	-0.0797812	0.469151	0.304024	-0.150418	-2.1188	0.713923	0.0823743	-0.0338914	-0.0879317	-15.0062	19.1811
236.5	0.357799	0.214558	-0.594149	-0.0754382	0.4618	0.408905	0.0840227	-1.99316	0.479455	0.528774	0.337084	0.0984992	-2.64203	24.2759
237	0.484528	0.331783	-0.588966	-0.0710882	0.430237	0.511167	0.329798	-1.77231	0.128998	0.870451	0.231666	0.128589	1.98545	27.7289
237.5	0.547071	0.462357	-0.583736	-0.0670241	0.422105	0.6101	0.582518	-1.46673	-0.280139	0.96905	-0.280878	-0.0577023	-1.52433	31.687
238	0.587376	0.603891	-0.578438	-0.062984	0.389791	0.705034	0.837113	-1.09274	-0.680242	0.747388	-0.63092	-0.176861	-5.42855	33.8912
238.5	0.657488	0.752808	-0.573082	-0.0591022	0.380887	0.795315	1.08849	-0.668802	-0.99881	0.235219	-0.340981	-0.0163295	-1.57193	37.2056
239	0.762549	0.904498	-0.567669	-0.0553277	0.347824	0.880342	1.33155	-0.215584	-1.17385	-0.438276	0.414269	0.174041	6.9732	39.3504
239.5	0.864292	1.05355	-0.562198	-0.0519555	0.338162	0.959533	1.55991	0.243652	-1.16503	-1.08642	0.912584	0.0701274	12.1836	42.6895
240	0.943512	1.19403	-0.556667	-0.0485529	0.304334	1.03237	1.7675	0.686498	-0.960096	-1.5059	0.595875	-0.128232	11.8713	44.8473
240.5	1.02706	1.31969	-0.551083	-0.0452204	0.293943	1.09839	1.94804	1.09056	-0.580298	-1.54624	-0.363174	-0.0999279	12.4498	48.6332
241	1.17022	1.42436	-0.545431	-0.0421694	0.259365	1.15715	2.09551	1.4353	-0.0772175	-1.15367	-1.13776	0.0680869	20.5916	52.0098
241.5	1.40651	1.50241	-0.539731	-0.0392969	0.24823	1.2083	2.20383	1.70287	0.475433	-0.395695	-0.967541	0.0846773	39.8108	57.445
242	1.70613	1.54925	-0.53397	-0.0365651	0.212938	1.25152	2.26777	1.87901	0.990473	0.549328	0.114952	-0.0193586	66.761	61.7416
242.5	1.97089	1.56182	-0.528153	-0.0339874	0.201143	1.28658	2.2827	1.95351	1.38035	1.43216	1.22294	-0.0307275	91.6651	65.9372
243	2.08087	1.53879	-0.522274	-0.031578	0.165177	1.31328	2.24378	1.92089	1.57627	1.99712	1.34689	-0.00836827	100.012	66.0757
243.5	1.98052	1.48051	-0.516341	-0.0292298	0.152697	1.3315	2.14989	1.78562	1.54317	2.07746	0.29213	-0.0440591	87.4284	63.9912
244	1.71445	1.38884	-0.51035	-0.0271324	0.116113	1.34119	2.00241	1.56075	1.2852	1.63743	-1.09343	-0.00696597	63.0521	57.752
244.5	1.38522	1.26696	-0.504302	-0.0253243	0.103033	1.34234	1.80435	1.26476	0.842178	0.77494	-1.6062	0.155423	41.512	51.0009
245	1.07675	1.11926	-0.498203	-0.0236768	0.065887	1.33502	1.56111	0.920652	0.282719	-0.295735	-0.720782	0.163944	27.9094	42.3958
245.5	0.801849	0.951195	-0.492045	-0.0220432	0.0522875	1.31935	1.27885	0.551587	-0.309021	-1.30787	0.86572	-0.190786	17.4603	34.9167
246	0.533439	0.768924	-0.485829	-0.02064	0.0146292	1.29552	0.964972	0.182211	-0.843252	-1.99402	1.7928	-0.400987	5.05395	26.3267
246.5	0.249593	0.578903	-0.479563	-0.0195579	0.000540581	1.26374	0.626954	-0.165871	-1.24267	-2.17343	1.17845	0.0188364	-9.92573	19.3438
247	-0.0209175	0.387414	-0.473237	-0.0184172	-0.0375244	1.22433	0.272907	-0.473803	-1.45173	-1.79699	-0.53049	0.582162	-27.028	12.1123
247.5	-0.202401	0.200198	-0.466857	-0.0175528	-0.0519897	1.17759	-0.0883614	-0.726593	-1.44426	-0.966937	-1.86791	0.33817	-41.147	7.81401
248	-0.229461	0.0221285	-0.460423	-0.0169843	-0.0904078	1.12391	-0.448151	-0.914898	-1.22864	0.0811431	-1.62256	-0.552415	-41.2943	4.26533
248.5	-0.126021	-0.143082	-0.453939	-0.0164423	-0.105152	1.06371	-0.798555	-1.0371	-0.851867	1.03638	0.0332836	-0.766643	-18.9633	3.16283
249	-0.0210901	-0.293067	-0.447398	-0.0161962	-0.143837	0.997434	-1.13217	-1.09704	-0.384233	1.62428	1.68257	0.213059	12.9646	0.434065
249.5	-0.066223	-0.426807	-0.440801	-0.0159474	-0.158775	0.925558	-1.44222	-1.10156	0.0980137	1.7045	1.90687	1.03055	25.0618	-2.97802
250	-0.301496	-0.544403	-0.434153	-0.0159538	-0.197566	0.848597	-1.72216	-1.05963	0.522598	1.31077	0.522071	0.348784	1.23355	-9.81848
250.5	-0.602002	-0.646712	-0.427454	-0.0162586	-0.212615	0.767083	-1.9649	-0.978757	0.838102	0.639	-1.24864	-0.937687	-35.4212	-16.2958
251	-0.797627	-0.73493	-0.420702	-0.0165099	-0.251454	0.681557	-2.164	-0.866817	1.01455	-0.0514613	-1.90285	-0.893499	-48.7119	-23.0277
251.5	-0.83561	-0.810262	-0.413895	-0.0172819	-0.266463	0.592596	-2.31479	-0.733088	1.04414	-0.547262	-0.966779	0.498579	-31.2424	-26.7031
252	-0.809724	-0.873728	-0.407038	-0.0179319	-0.305237	0.500751	-2.41424	-0.587442	0.939103	-0.75106	0.674286	1.18485	-11.8396	-30.3059
252.5	-0.845418	-0.926073	-0.400128	-0.0189664	-0.320126	0.406614	-2.46108	-0.442245	0.719822	-0.709174	1.59358	0.0705891	-15.6111	-32.5186
253	-0.956712	-0.967737	-0.393171	-0.0201561	-0.358708	0.310749	-2.45388	-0.304818	0.423003	-0.527845	1.13236	-1.1305	-33.2297	-36.2199
253.5	-1.06877	-0.998831	-0.386156	-0.0213822	-0.373361	0.213737	-2.39242	-0.17881	0.0978342	-0.316306	-0.145182	-0.579053	-40.811	-38.5721
254	-1.12708	-1.01916	-0.379094	-0.0229037	-0.41165	0.116139	-2.27829	-0.0677561	-0.209226	-0.157781	-1.11459	0.796995	-37.2816	-41.5826
254.5	-1.12867	-1.02836	-0.371985	-0.0245368	-0.425969	0.0185035	-2.11465	0.0266522	-0.457902	-0.0775748	-1.07156	0.881618	-36.1741	-42.6203
255	-1.08962	-1.02615	-0.364825	-0.0263519	-0.463848	-0.0786185	-1.90584	0.104375	-0.620692	-0.0517858	-0.228145	-0.342176	-39.779	-44.188
255.5	-1.02742	-1.0126	-0.357616	-0.0285156	-0.477693	-0.174708	-1.65697	0.166211	-0.689779	-0.0406843	0.607937	-0.937005	-35.8882	-44.0197
256	-0.968487	-0.988324	-0.350356	-0.0306821	-0.515062	-0.269262	-1.37409	0.213905	-0.671698	-0.0154119	0.798157	-0.0944522	-23.0895	-44.8446
256.5	-0.937732	-0.954436	-0.343045	-0.0330915	-0.528318	-0.361791	-1.06436	0.249627	-0.582418	0.0277333	0.350276	0.774242	-15.1114	-44.4317
257	-0.926134	-0.912384	-0.335693	-0.0356826	-0.565046	-0.45184	-0.735759	0.275828	-0.444488	0.0729554	-0.230788	0.394594	-20.5592	-45.2018
257.5	-0.89121	-0.863755	-0.328291	-0.0383293	-0.577623	-0.538978	-0.397162	0.295674	-0.278889	0.107365	-0.458259	-0.493165	-27.0766	-44.4271
258	-0.810696	-0.810225	-0.320839	-0.0412736	-0.613623	-0.622786	-0.0574766	0.312117	-0.106174	0.13136	-0.267736	-0.521131	-21.0756	-44.4502
258.5	-0.715051	-0.753643	-0.313343	-0.0444162	-0.625409	-0.702891	0.275161	0.32684	0.0504891	0.154648	0.0287786	0.187464	-6.62677	-43.0955
259	-0.643845	-0.696105	-0.305797	-0.0476183	-0.660562	-0.778942	0.593259	0.340898	0.172695	0.192464	0.138683	0.482929	1.28009	-43.1855
259.5	-0.594572	-0.639864	-0.298209	-0.0509524	-0.671486	-0.850602	0.89073	0.355183	0.249332	0.252154	0.0668523	0.0631167	0.0611925	-42.3401
260	-0.541213	-0.587087	-0.290572	-0.0544507	-0.705692	-0.917582	1.16211	0.369623	0.277846	0.314957	0.00954959	-0.325265	-1.59476	-42.8918
260.5	-0.484074	-0.539654	-0.282894	-0.0581907	-0.715613	-0.979612	1.40167	0.383385	0.266605	0.338037	0.0742683	-0.205634	2.22023	-42.404
261	-0.454383	-0.499138	-0.275166	-0.0620763	-0.748813	-1.03645	1.6049	0.394995	0.22939	0.270852	0.149854	0.103364	6.30848	-43.5843
261.5	-0.472058	-0.466895	-0.2674	-0.0660907	-0.757651	-1.08789	1.76937	0.40146	0.176049	0.0787939	0.0561645	0.209691	5.12496	-44.2351
262	-0.515515	-0.444098	-0.259587	-0.0703624	-0.78972	-1.13374	1.89397	0.400067	0.117515	-0.218383	-0.178948	0.124911	-1.14277	-46.7386
262.5	-0.543584	-0.431676	-0.251731	-0.0746721	-0.797371	-1.17383	1.97866	0.388853	0.0671032	-0.537168	-0.299442	-0.0526896	-7.52289	-48.2259
263	-0.532923	-0.43021	-0.243833	-0.0791031	-0.828239	-1.20805	2.02385	0.365258	0.0344818	-0.761505	-0.119556	-0.252367	-10.6907	-50.7146
263.5	-0.492393	-0.439866	-0.235893	-0.0838693	-0.834663	-1.23629	2.02973	0.325629	0.0233862	-0.790573	0.222771	-0.227506	-8.07274	-51.5447
264	-0.45133	-0.460381	-0.227912	-0.0887218	-0.864216	-1.25845	1.99718	0.266895	0.0322273	-0.578168	0.382681	0.171928	-1.66556	-53.2547
264.5	-0.439385	-0.491096	-0.219887	-0.0934674	-0.869291	-1.27448	1.92788	0.187606	0.0569897	-0.158505	0.169949	0.482975	2.09768	-53.6494
265	-0.465444	-0.531009	-0.211823	-0.0986529	-0.897488	-1.28436	1.82398	0.0877514	0.0895942	0.349751	-0.241614	0.114015	-2.68842	-55.4528
265.5	-0.505835	-0.57884	-0.203717	-0.10386	-0.901164	-1.28807	1.68749	-0.031135	0.11824	0.778137	-0.466958	-0.557975	-9.6901	-56.3537
266	-0.528387	-0.633063	-0.195575	-0.109187	-0.927923	-1.28562	1.52152	-0.164038	0.132326	0.977201	-0.261332	-0.471874	-7.84501	-58.8898
266.5	-0.547047	-0.691926	-0.187392	-0.114686	-0.930102	-1.27706	1.33007	-0.303308	0.124929	0.870613	0.218689	0.392609	1.24363	-60.8473
267	-0.625438	-0.753492	-0.179168	-0.120169	-0.955344	-1.26244	1.11669	-0.441854	0.0909613	0.475788	0.520468	0.719215	-0.358489	-65.035
267.5	-0.792327	-0.815719	-0.170911	-0.125999	-0.955989	-1.24186	0.887194	-0.569833	0.029625	-0.0769685	0.361762	-0.0555872	-19.1856	-68.8188
268	-0.989859	-0.876537	-0.16261	-0.131881	-0.97963	-1.2154	0.648159	-0.67446	-0.0508648	-0.585122	-0.100141	-0.7437	-39.9565	-73.7681
268.5	-1.13094	-0.933886	-0.154276	-0.137751	-0.978648	-1.1832	0.405345	-0.745233	-0.139554	-0.871019	-0.46759	-0.298133	-45.7006	-76.4821
269	-1.17495	-0.985779	-0.145907	-0.143971	-1.00063	-1.14542	0.163846	-0.774627	-0.224145	-0.846583	-0.448136	0.566977	-39.9859	-78.9996
269.5	-1.14427	-1.03042	-0.137499	-0.15007	-0.997988	-1.10221	-0.0721451	-0.758062	-0.290701	-0.538452	-0.0832019	0.531712	-35.9862	-79.042
270	-1.08742	-1.0664	-0.129051	-0.156345	-1.0183	-1.0538	-0.298919	-0.694831	-0.328405	-0.0745744	0.303334	-0.300852	-37.5174	-79.5409
270.5	-1.04186	-1.09294	-0.120576	-0.162766	-1.01389	-1.00037	-0.512931	-0.58775	-0.331792	0.370555	0.404921	-0.62848	-35.8308	-78.5017
271	-1.02845	-1.10989	-0.112064	-0.169176	-1.03244	-0.94218	-0.710939	-0.442882	-0.300733	0.644491	0.186068	0.00292606	-28.7693	-78.7479
271.5	-1.05296	-1.11771	-0.103515	-0.175766	-1.02624	-0.879491	-0.890478	-0.269435	-0.240083	0.669042	-0.127752	0.576577	-24.6714	-78.0309
272	-1.09609	-1.11728	-0.0949394	-0.18243	-1.04297	-0.812576	-1.04947	-0.0777182	-0.156816	0.465688	-0.267679	0.274755	-29.4416	-78.7219
272.5	-1.12405	-1.10974	-0.0863234	-0.189041	-1.03495	-0.741749	-1.18657	0.121211	-0.0581743	0.133806	-0.164895	-0.366235	-35.7292	-78.0441
273	-1.12173	-1.09643	-0.0776798	-0.195964	-1.04981	-0.667321	-1.30169	0.314108	0.0452339	-0.205636	0.0100153	-0.442826	-35.7157	-78.2156
273.5	-1.09811	-1.07878	-0.0690044	-0.202931	-1.0399	-0.589635	-1.39431	0.488223	0.139406	-0.445536	0.076939	0.0606927	-29.7606	-76.6861
274	-1.06857	-1.0582	-0.0602967	-0.209709	-1.05286	-0.509052	-1.46378	0.632174	0.21077	-0.523874	0.0342429	0.413587	-25.2879	-75.9085
274.5	-1.03562	-1.03589	-0.0515544	-0.216871	-1.04102	-0.425944	-1.5096	0.736457	0.249535	-0.436788	0.0169108	0.210514	-24.6836	-73.4368
275	-0.992333	-1.0126	-0.0427887	-0.223925	-1.05204	-0.340702	-1.5312	0.794277	0.250589	-0.229328	0.0939321	-0.205514	-24.867	-71.7973
275.5	-0.941564	-0.988645	-0.0339923	-0.231037	-1.03826	-0.253734	-1.528	0.801763	0.212772	0.0238756	0.153226	-0.325015	-22.184	-68.7548
276	-0.901193	-0.964086	-0.0251656	-0.238364	-1.04728	-0.165446	-1.49951	0.758058	0.14041	0.244373	0.0347493	-0.0747882	-18.7296	-67.0617
276.5	-0.884446	-0.93889	-0.0163155	-0.245588	-1.03152	-0.0762708	-1.44591	0.665976	0.0478047	0.375429	-0.218755	0.236306	-17.0884	-64.392
277	-0.883888	-0.912973	-0.00743621	-0.252807	-1.03854	0.0133594	-1.36752	0.531714	-0.0465542	0.393119	-0.339587	0.289096	-18.2516	-63.0866
277.5	-0.879625	-0.886104	0.00147068	-0.26027	-1.02077	0.103007	-1.26533	0.363975	-0.124897	0.304859	-0.119406	0.0115571	-20.058	-60.5007
278	-0.861977	-0.857801	0.0104095	-0.267605	-1.02573	0.192228	-1.14096	0.173182	-0.172236	0.141591	0.300238	-0.328606	-21.175	-59.0183
278.5	-0.841651	-0.827357	0.0193658	-0.275135	-1.00592	0.280577	-0.996712	-0.0289198	-0.175923	-0.0492711	0.494213	-0.306534	-20.4426	-56.2423
279	-0.835351	-0.793961	0.0283514	-0.282522	-1.00886	0.367615	-0.835524	-0.230011	-0.130969	-0.217067	0.183008	0.146263	-19.7972	-54.6377
279.5	-0.838167	-0.75684	0.0373631	-0.289941	-0.986962	0.452896	-0.660445	-0.417796	-0.0457852	-0.319588	-0.399873	0.490095	-21.4004	-51.5594
280	-0.814911	-0.71536	0.0463923	-0.297375	-0.987861	0.53599	-0.474552	-0.580757	0.0616835	-0.334172	-0.655089	0.183816	-25.0192	-49.1168
280.5	-0.730154	-0.669064	0.0554535	-0.304878	-0.963905	0.61647	-0.280703	-0.708729	0.166046	-0.262805	-0.226352	-0.443389	-23.5279	-44.6314
281	-0.595468	-0.617685	0.0645307	-0.312356	-0.962715	0.69392	-0.0821536	-0.793846	0.240745	-0.13089	0.54051	-0.501856	-12.4411	-40.7905
281.5	-0.47774	-0.56119	0.0736313	-0.319763	-0.936688	0.767943	0.117011	-0.832067	0.262174	0.017557	0.84143	0.155621	1.46849	-35.8099
282	-0.432902	-0.499822	0.0827495	-0.32728	-0.933445	0.838146	0.31256	-0.821942	0.217316	0.144024	0.255684	0.626286	3.94099	-32.682
282.5	-0.433638	-0.43413	0.0918954	-0.334777	-0.905364	0.904162	0.500663	-0.762907	0.112944	0.237427	-0.702182	0.234375	-6.23764	-28.7596
283	-0.396307	-0.364924	0.101056	-0.342235	-0.900058	0.965644	0.678265	-0.656962	-0.0330052	0.29997	-1.05232	-0.485764	-14.2541	-25.8198
283.5	-0.278307	-0.29322	0.110241	-0.349793	-0.869917	1.02226	0.84221	-0.509513	-0.196509	0.328857	-0.359179	-0.538205	-5.19552	-21.0301
284	-0.131119	-0.220242	0.119437	-0.357231	-0.862549	1.0737	0.989191	-0.328307	-0.346834	0.312833	0.771941	0.134194	15.0638	-17.2575
284.5	-0.0516198	-0.147517	0.128658	-0.36452	-0.830397	1.11969	1.11591	-0.124022	-0.454144	0.22625	1.22271	0.585721	26.2586	-12.9526
285	-0.0757704	-0.0769647	0.137892	-0.371943	-0.821038	1.15999	1.21961	0.0914221	-0.493134	0.046963	0.493866	0.242754	17.0638	-11.04
285.5	-0.1365	-0.010887	0.147146	-0.379174	-0.786852	1.19436	1.29872	0.307818	-0.442294	-0.21259	-0.723351	-0.347955	0.558218	-8.54542
286	-0.140427	0.0481796	0.156417	-0.386339	-0.775506	1.2226	1.35216	0.514509	-0.295197	-0.508618	-1.24574	-0.43099	-3.96705	-7.0208
286.5	-0.0596821	0.0976905	0.1657	-0.393751	-0.739357	1.24457	1.37885	0.699481	-0.0671739	-0.770505	-0.593603	-0.0186774	9.05529	-3.61004
287	0.0582701	0.135312	0.174996	-0.400829	-0.726061	1.26011	1.37831	0.851475	0.209471	-0.901789	0.563468	0.338738	27.4789	-1.11457
287.5	0.147379	0.159107	0.184308	-0.40793	-0.688014	1.26914	1.35044	0.960467	0.489237	-0.80912	1.1008	0.283931	37.3326	2.28922
288	0.18544	0.167713	0.193635	-0.41494	-0.672802	1.27158	1.29686	1.01854	0.718629	-0.441299	0.557936	-0.0625181	34.6561	3.88979
288.5	0.209904	0.160541	0.202976	-0.422065	-0.632885	1.26739	1.21981	1.02106	0.848838	0.174105	-0.428397	-0.309153	29.4167	6.42834
289	0.267758	0.137981	0.212331	-0.428797	-0.615865	1.25657	1.12149	0.966133	0.846054	0.905243	-0.837624	-0.203094	32.2244	7.73157
289.5	0.351998	0.101515	0.221693	-0.43562	-0.574138	1.23915	1.00443	0.85516	0.700584	1.53644	-0.331187	0.134577	43.5109	9.90146
290	0.386664	0.0536058	0.231063	-0.442394	-0.555325	1.2152	0.871457	0.692675	0.426508	1.83014	0.436403	0.307544	50.1328	9.47145
290.5	0.287448	-0.0026292	0.240448	-0.448984	-0.511873	1.1848	0.724839	0.485284	0.056768	1.61128	0.567378	0.0852851	39.9522	7.95244
291	0.0533785	-0.0638349	0.249844	-0.455507	-0.491378	1.14808	0.566997	0.243539	-0.35525	0.86199	-0.0540263	-0.239193	14.7509	2.96285
291.5	-0.217018	-0.126714	0.259242	-0.46201	-0.446288	1.10519	0.402599	-0.0157753	-0.736921	-0.228719	-0.61712	-0.202402	-9.42207	-1.74959
292	-0.422173	-0.18813	0.268653	-0.468376	-0.424194	1.05632	0.236615	-0.275722	-1.02057	-1.33577	-0.374916	0.110097	-22.2786	-7.10297
292.5	-0.535296	-0.245099	0.27807	-0.474608	-0.377527	1.00169	0.0727919	-0.521574	-1.15869	-2.10807	0.470029	0.228868	-25.8902	-9.73686
293	-0.590623	-0.294853	0.287501	-0.480696	-0.35394	0.941536	-0.0856671	-0.739757	-1.12565	-2.28179	0.967068	0.00155323	-28.6984	-11.912
293.5	-0.614557	-0.335053	0.296929	-0.486577	-0.305805	0.876123	-0.23593	-0.918451	-0.921681	-1.78255	0.439919	-0.228783	-32.668	-11.2889
294	-0.584493	-0.36407	0.306364	-0.492496	-0.280825	0.805746	-0.375739	-1.04864	-0.574236	-0.767651	-0.73306	-0.126246	-32.8679	-10.4509
294.5	-0.464606	-0.381163	0.315805	-0.498154	-0.231364	0.730724	-0.503804	-1.12532	-0.135768	0.416192	-1.42507	0.169583	-22.8718	-7.20562
295	-0.269926	-0.386471	0.325249	-0.503865	-0.205096	0.65139	-0.619386	-1.1464	0.32769	1.36606	-0.850478	0.242866	-4.11966	-4.71513
295.5	-0.0909186	-0.380874	0.334695	-0.50931	-0.154407	0.568105	-0.722982	-1.11322	0.746518	1.77216	0.589004	-0.0570464	14.5352	-1.72571
296	-0.0292688	-0.365828	0.34415	-0.514649	-0.126977	0.481245	-0.814863	-1.02884	1.05931	1.5442	1.63221	-0.32529	22.505	-1.79621
296.5	-0.11384	-0.34322	0.353595	-0.51982	-0.0752156	0.391215	-0.894182	-0.896438	1.22367	0.847137	1.33518	-0.110847	16.5429	-2.65609
297	-0.281347	-0.315172	0.363054	-0.524792	-0.046771	0.298415	-0.96038	-0.720522	1.22169	0.0154209	-0.0705664	0.332824	-0.916326	-5.8158
297.5	-0.415657	-0.283746	0.372511	-0.529711	0.00595609	0.203282	-1.01175	-0.504832	1.06355	-0.585518	-1.37375	0.337906	-20.2235	-7.16
298	-0.427284	-0.250626	0.381962	-0.53431	0.035286	0.106261	-1.04643	-0.255255	0.778444	-0.732491	-1.51828	-0.203902	-29.8872	-7.86111
298.5	-0.308805	-0.216938	0.391414	-0.538826	0.0887861	0.00780798	-1.06395	0.017735	0.405267	-0.444128	-0.511402	-0.535228	-21.8253	-5.38486
299	-0.133334	-0.183279	0.400868	-0.543157	0.118841	-0.0916172	-1.06454	0.301228	-0.00902876	0.0574778	0.731544	-0.0637153	-1.62095	-3.22834
299.5	-0.0119008	-0.149895	0.410317	-0.54745	0.172997	-0.191531	-1.04936	0.579944	-0.416178	0.463118	1.24956	0.577532	12.4895	-0.396179
300	-0.0112769	-0.116883	0.419765	-0.551293	0.203603	-0.291453	-1.01989	0.838169	-0.771109	0.53408	0.812036	0.373873	5.47776	-0.214942
300.5	-0.0962834	-0.0843559	0.42921	-0.555231	0.258251	-0.3909	-0.976629	1.06257	-1.03263	0.224583	-0.0358193	-0.432702	-14.493	0.0510402
301	-0.17325	-0.0525753	0.43865	-0.55885	0.289254	-0.489368	-0.919481	1.24174	-1.1711	-0.311114	-0.610715	-0.618574	-27.0957	-1.05876
301.5	-0.183574	-0.0220876	0.448085	-0.56231	0.344202	-0.586369	-0.848536	1.36569	-1.17354	-0.807488	-0.663211	0.145607	-23.3787	-0.208108
302	-0.138997	0.00616665	0.457517	-0.565588	0.375413	-0.681402	-0.764239	1.42607	-1.04412	-1.01964	-0.392429	0.73064	-14.7778	0.484846
302.5	-0.0749454	0.0308473	0.466939	-0.568556	0.430487	-0.773982	-0.667756	1.41608	-0.803932	-0.841422	-0.0905977	0.218529	-12.1421	3.39412
303	0.00535941	0.0503604	0.476354	-0.571489	0.461756	-0.86361	-0.560633	1.33198	-0.484421	-0.346097	0.147118	-0.666412	-10.7545	5.82114
303.5	0.113654	0.0631456	0.485764	-0.574044	0.516769	-0.9498	-0.444664	1.17378	-0.121639	0.254937	0.36073	-0.590171	1.11662	9.78576
304	0.220698	0.068013	0.495163	-0.576654	0.547867	-1.03209	-0.32218	0.944956	0.247434	0.712031	0.501941	0.381003	18.9948	12.0756
304.5	0.259433	0.0644024	0.504559	-0.578747	0.60266	-1.11	-0.196765	0.652919	0.591405	0.853838	0.40415	0.828612	25.5263	14.3791
305	0.19638	0.0524943	0.513938	-0.580715	0.633415	-1.1831	-0.0717499	0.309806	0.882896	0.661257	-0.00557282	0.0721177	12.3229	14.032
305.5	0.0823933	0.0331861	0.52331	-0.582483	0.687749	-1.25093	0.052011	-0.0652908	1.09864	0.275018	-0.496104	-0.789155	-5.47237	14.1669
306	-0.00170529	0.00802128	0.532671	-0.584163	0.717979	-1.31309	0.175051	-0.450461	1.21765	-0.0986673	-0.696416	-0.532889	-10.3234	13.2972
306.5	-0.023872	-0.0208421	0.542022	-0.585396	0.771684	-1.36918	0.296753	-0.823739	1.22518	-0.298875	-0.413049	0.45907	-1.95522	14.4335
307	-0.0158335	-0.0506089	0.551357	-0.586586	0.801175	-1.41883	0.416702	-1.16243	1.11357	-0.269993	0.191427	0.815581	4.51983	15.0666
307.5	-0.027753	-0.0778404	0.560684	-0.587384	0.85403	-1.46168	0.534539	-1.44521	0.881296	-0.0794134	0.678061	0.0538088	-0.112753	17.2253
308	-0.0730869	-0.098598	0.569994	-0.587889	0.882601	-1.49743	0.649627	-1.65341	0.538265	0.136041	0.674677	-0.781358	-10.6889	18.0752
308.5	-0.126382	-0.1088	0.579289	-0.588419	0.934396	-1.5258	0.76188	-1.77128	0.107445	0.255841	0.181702	-0.535863	-16.008	19.9976
309	-0.166366	-0.104706	0.588572	-0.588535	0.961812	-1.54651	0.870608	-1.78914	-0.375829	0.228935	-0.43807	0.425963	-16.6219	20.6895
309.5	-0.182451	-0.0833518	0.597841	-0.58847	1.01236	-1.55938	0.974673	-1.70274	-0.860886	0.0990928	-0.710562	0.790114	-19.4796	22.958
310	-0.159888	-0.0428534	0.607088	-0.588082	1.03838	-1.56421	1.07234	-1.51432	-1.29006	-0.0368341	-0.429883	0.10321	-26.0237	24.7564
310.5	-0.0850315	0.01737	0.616321	-0.587458	1.08748	-1.56087	1.16149	-1.23344	-1.60934	-0.100055	0.158056	-0.706848	-27.7467	28.7466
311	0.0293651	0.0963361	0.625534	-0.586731	1.11196	-1.54927	1.23932	-0.876896	-1.7736	-0.0840007	0.552468	-0.619046	-19.6026	32.2874
311.5	0.145903	0.191288	0.634731	-0.58568	1.15935	-1.52937	1.30225	-0.466747	-1.74905	-0.0564162	0.437088	0.262347	-5.91496	37.3918
312	0.235251	0.297738	0.643912	-0.584206	1.18201	-1.50114	1.34654	-0.0285107	-1.52177	-0.115347	-0.0402127	0.86798	2.49258	41.2088
312.5	0.305898	0.40986	0.65307	-0.582797	1.22752	-1.46464	1.3693	0.410709	-1.10501	-0.320412	-0.408937	0.391067	1.69875	46.0843
313	0.396704	0.521093	0.662206	-0.580746	1.2482	-1.41995	1.368	0.823856	-0.537371	-0.63522	-0.321709	-0.683162	-0.758958	49.737
313.5	0.534905	0.624755	0.671327	-0.578573	1.29158	-1.36721	1.34038	1.18534	0.120252	-0.91901	0.103069	-0.974895	8.72254	54.8465
314	0.702383	0.714562	0.680424	-0.576343	1.31003	-1.3066	1.28527	1.47264	0.790082	-0.979743	0.392995	0.0691189	31.3786	58.9833
314.5	0.849878	0.785115	0.689495	-0.573594	1.35109	-1.23837	1.2014	1.66738	1.39061	-0.670264	0.204559	1.17028	51.9259	64.384
315	0.952756	0.832373	0.698545	-0.570663	1.36711	-1.16276	1.08795	1.75763	1.84684	0.0228084	-0.296853	0.729186	54.7978	68.3432
315.5	1.03794	0.854066	0.707573	-0.56768	1.40563	-1.08014	0.945112	1.738	2.09666	0.933032	-0.577409	-0.838044	47.6274	73.1293
316	1.14036	0.849914	0.716578	-0.56422	1.41899	-0.990844	0.773958	1.61037	2.10343	1.7547	-0.260341	-1.35331	52.0933	75.9327
316.5	1.22685	0.821618	0.725561	-0.5604	1.45478	-0.89531	0.57636	1.38456	1.86458	2.15928	0.450071	0.0859588	72.4545	78.3737
317	1.19223	0.772678	0.734517	-0.556456	1.4653	-0.793991	0.355248	1.07718	1.4096	1.93162	0.884246	1.53043	80.377	76.907
317.5	0.957367	0.708121	0.743443	-0.552107	1.4981	-0.687392	0.113883	0.707562	0.795179	1.06283	0.525862	0.773739	49.811	73.5684
318	0.593986	0.63417	0.752343	-0.547578	1.50558	-0.576042	-0.141258	0.305267	0.10465	-0.182134	-0.367947	-1.10245	-2.49574	67.1872
318.5	0.263731	0.557839	0.761222	-0.54287	1.53528	-0.460531	-0.402586	-0.0967345	-0.569979	-1.37884	-0.995709	-1.36241	-35.1315	62.4974
319	0.0776589	0.486437	0.770067	-0.537781	1.5395	-0.341463	-0.662946	-0.468449	-1.14644	-2.12468	-0.780232	0.29079	-34.6164	58.7945
319.5	0.038944	0.427001	0.778888	-0.532412	1.56587	-0.219481	-0.915745	-0.785588	-1.56575	-2.19634	0.0897776	1.42539	-23.5539	58.9475
320	0.0969061	0.385735	0.787674	-0.526799	1.56669	-0.09526	-1.1544	-1.02842	-1.79287	-1.61622	0.864554	0.544058	-24.5099	59.9656
320.5	0.204397	0.367519	0.796437	-0.520984	1.58955	0.0305055	-1.3731	-1.1834	-1.81809	-0.633969	0.895474	-0.980028	-31.976	63.5154
321	0.324578	0.375499	0.805167	-0.514786	1.58679	0.157101	-1.56733	-1.24668	-1.66005	0.36878	0.167566	-1.12368	-30.2713	66.3851
321.5	0.438248	0.410804	0.813864	-0.50828	1.60598	0.283793	-1.73184	-1.22023	-1.35792	1.05342	-0.671432	0.180708	-15.5194	70.5174
322	0.544828	0.472474	0.822536	-0.501594	1.59946	0.409831	-1.8613	-1.1101	-0.958144	1.25777	-0.89108	1.21242	-0.201926	73.2082
322.5	0.646095	0.557635	0.831173	-0.494694	1.61485	0.534475	-1.9516	-0.929332	-0.510835	1.02085	-0.355664	0.676804	4.36034	76.8269
323	0.743483	0.661882	0.83978	-0.487454	1.6045	0.656957	-1.99957	-0.696009	-0.0620745	0.539517	0.410001	-0.742326	0.633153	79.0384
323.5	0.842112	0.779752	0.848351	-0.479842	1.61592	0.776546	-2.00308	-0.430712	0.354515	0.0658798	0.751043	-1.2595	2.39116	82.6179
324	0.949177	0.905254	0.856888	-0.472185	1.60156	0.892489	-1.96101	-0.155607	0.715801	-0.214467	0.45387	-0.146318	15.7103	85.415
324.5	1.0647	1.03247	0.865392	-0.464072	1.60896	1.00406	-1.87364	0.106739	1.00678	-0.255422	-0.139469	1.27971	31.3905	89.932
325	1.17833	1.15617	0.873855	-0.455685	1.59048	1.11057	-1.74242	0.335438	1.21811	-0.144782	-0.515318	1.11202	33.8228	93.4553
325.5	1.28374	1.27228	0.882289	-0.447207	1.59372	1.21131	-1.57042	0.512382	1.34267	-0.0358865	-0.46085	-0.654695	23.7331	98.0544
326	1.39345	1.37798	0.890692	-0.43829	1.57109	1.30565	-1.36163	0.624006	1.37353	-0.0494652	-0.148023	-1.73955	20.2801	101.017
326.5	1.51858	1.47167	0.89905	-0.429281	1.57014	1.39296	-1.11972	0.66314	1.30435	-0.198754	0.158292	-0.440839	37.9933	104.716
327	1.63216	1.55289	0.907377	-0.419897	1.54325	1.47267	-0.849168	0.628482	1.13	-0.385906	0.343903	1.69085	60.6156	106.631
327.5	1.69241	1.62249	0.91566	-0.410338	1.53807	1.54424	-0.555053	0.525055	0.847009	-0.456437	0.417659	1.62139	59.8726	109.221
328	1.70741	1.68255	0.923907	-0.400287	1.50691	1.60719	-0.243145	0.363813	0.461991	-0.288595	0.333257	-0.856594	34.0845	110.286
328.5	1.74423	1.73608	0.932118	-0.390242	1.49745	1.66109	0.0802486	0.161631	0.000824845	0.131581	-0.011024	-2.37403	16.8964	112.709
329	1.84276	1.78643	0.940287	-0.379749	1.46207	1.70555	0.408281	-0.0612485	-0.496373	0.67162	-0.55439	-0.55034	31.4571	114.101
329.5	1.95134	1.83675	0.948422	-0.369117	1.44834	1.74027	0.733167	-0.283887	-0.980158	1.09028	-0.904886	2.28324	57.0566	116.35
330	1.98794	1.88954	0.956512	-0.358134	1.40872	1.76498	1.04716	-0.48499	-1.39438	1.14956	-0.575435	2.01147	55.2546	116.312
330.5	1.94622	1.94636	0.964563	-0.347013	1.3908	1.7795	1.34329	-0.644455	-1.68471	0.730562	0.430668	-1.27031	26.929	116.252
331	1.89768	2.00748	0.972573	-0.335689	1.34699	1.78369	1.61563	-0.744178	-1.80412	-0.0895714	1.37012	-2.92448	11.9097	114.107
331.5	1.87863	2.07167	0.980541	-0.324069	1.32494	1.77751	1.8589	-0.769753	-1.71912	-1.04755	1.2974	-0.355232	30.2357	112.804
332	1.84098	2.1361	0.988466	-0.312105	1.27705	1.76095	2.06779	-0.713892	-1.42034	-1.79702	0.0120794	2.87971	47.4268	110.236
332.5	1.77067	2.19661	0.996347	-0.300039	1.25096	1.7341	2.23712	-0.57701	-0.927799	-2.04056	-1.51911	2.02416	28.7816	109.591
333	1.78966	2.24815	1.00419	-0.287631	1.19912	1.6971	2.36262	-0.366097	-0.289509	-1.64225	-1.89731	-1.82078	-0.405359	109.638
333.5	2.0363	2.28523	1.01198	-0.275171	1.16915	1.65017	2.44021	-0.0958053	0.421492	-0.692193	-0.646862	-3.12473	18.5825	113.344
334	2.45317	2.30241	1.01974	-0.262334	1.11349	1.59359	2.46619	0.212661	1.11461	0.524387	1.21521	0.0636929	90.6123	116.839
334.5	2.77198	2.29471	1.02744	-0.249311	1.07979	1.5277	2.43596	0.529766	1.68643	1.61337	2.01831	3.14834	148.178	119.622
335	2.78731	2.2582	1.03511	-0.235987	1.02051	1.4529	2.34637	0.825294	2.04669	2.24036	1.07534	1.7226	135.292	117.113
335.5	2.57044	2.19039	1.04273	-0.222558	0.983305	1.36966	2.19903	1.07631	2.14339	2.26747	-0.623043	-2.04934	81.8695	112.137
336	2.34727	2.09047	1.05029	-0.208808	0.920601	1.27851	1.99943	1.26888	1.96832	1.7737	-1.47837	-2.73294	58.3962	104.093
336.5	2.19003	1.95926	1.05782	-0.194946	0.880114	1.18001	1.75223	1.38698	1.54436	0.934897	-0.964161	0.321603	78.9891	96.3398
337	1.98129	1.79898	1.0653	-0.180765	0.81426	1.0748	1.46356	1.42016	0.929746	-0.024576	0.104072	2.6364	93.0296	86.0833
337.5	1.62498	1.61304	1.07273	-0.166637	0.770727	0.963521	1.14179	1.36696	0.215131	-0.887342	0.653773	1.27555	64.062	75.5604
338	1.18966	1.40583	1.08011	-0.15202	0.701977	0.846907	0.795995	1.23143	-0.496221	-1.50807	0.437482	-1.5571	13.8049	63.098
338.5	0.832277	1.18254	1.08745	-0.137504	0.655699	0.72568	0.436144	1.02339	-1.10334	-1.8162	0.0733499	-2.0872	-11.4254	52.4968
339	0.6176	0.948846	1.09473	-0.122565	0.584364	0.600614	0.0722189	0.756787	-1.52365	-1.79882	0.114987	0.0428347	-1.78498	42.0319
339.5	0.466332	0.710692	1.10196	-0.107435	0.535664	0.472505	-0.286258	0.44743	-1.70999	-1.48366	0.338777	1.87116	11.8016	33.8349
340	0.279326	0.473964	1.10915	-0.0922672	0.462059	0.342149	-0.630725	0.111796	-1.65328	-0.92436	0.120965	1.20203	0.47515	24.8222
340.5	0.0711237	0.24414	1.11629	-0.0768663	0.411275	0.210367	-0.953269	-0.231897	-1.37654	-0.193126	-0.604589	-0.871053	-25.6941	17.469
341	-0.0558073	0.0258903	1.12338	-0.0610702	0.335772	0.0779846	-1.24683	-0.565012	-0.932966	0.599628	-1.09254	-1.69803	-34.5969	9.87338
341.5	-0.0551337	-0.177179	1.13041	-0.0455163	0.283257	-0.054178	-1.50624	-0.871852	-0.399571	1.28991	-0.613442	-0.393985	-11.8121	4.6137
342	-0.0188452	-0.362459	1.1374	-0.0295523	0.206194	-0.185312	-1.72772	-1.13951	0.136143	1.69736	0.616696	1.30536	20.1706	-1.63459
342.5	-0.103817	-0.528073	1.14433	-0.013478	0.152301	-0.314617	-1.90764	-1.35643	0.590156	1.69519	1.49554	1.29873	27.8408	-7.74863
343	-0.380702	-0.672663	1.15121	0.00280983	0.0740593	-0.441311	-2.0432	-1.51308	0.896736	1.26631	1.10105	-0.342093	1.52494	-16.8403
343.5	-0.75636	-0.795367	1.15805	0.0191878	0.019209	-0.564631	-2.13248	-1.60111	1.02188	0.534582	-0.298696	-1.46654	-33.1055	-25.6966
344	-1.05486	-0.895832	1.16483	0.0356248	-0.0598174	-0.683851	-2.17313	-1.61131	0.967671	-0.258266	-1.4202	-0.593382	-46.3183	-35.0848
344.5	-1.18808	-0.974127	1.17155	0.0522736	-0.115254	-0.798278	-2.16461	-1.54047	0.761587	-0.870776	-1.26735	0.985011	-37.8632	-41.3604
345	-1.19957	-1.0306	1.17822	0.0691203	-0.194653	-0.907252	-2.10824	-1.39193	0.450937	-1.14825	-0.0792958	1.07958	-30.5176	-46.9139
345.5	-1.17724	-1.06589	1.18484	0.0859876	-0.25028	-1.01016	-2.00647	-1.1736	0.0947179	-1.06538	0.986509	-0.273801	-34.2765	-49.8752
346	-1.16486	-1.08106	1.1914	0.103039	-0.329651	-1.10644	-1.86277	-0.897113	-0.245192	-0.72128	1.03003	-1.06245	-39.0042	-53.2296
346.5	-1.15326	-1.07774	1.19791	0.12013	-0.385077	-1.19556	-1.68181	-0.577485	-0.514346	-0.288733	0.212591	-0.307623	-34.2001	-54.7355
347	-1.11988	-1.05821	1.20436	0.137515	-0.464027	-1.27706	-1.46916	-0.232314	-0.673742	0.0613504	-0.553304	0.709691	-25.5669	-56.899
347.5	-1.05595	-1.02524	1.21077	0.154633	-0.5188	-1.35053	-1.23138	0.11957	-0.704727	0.227824	-0.591248	0.565924	-21.1796	-57.3542
348	-0.971985	-0.982018	1.21711	0.172158	-0.596914	-1.4156	-0.9742	0.459358	-0.614314	0.212015	-0.0792601	-0.298077	-19.1772	-58.7312
348.5	-0.890556	-0.932108	1.2234	0.18981	-0.650644	-1.47198	-0.703262	0.769144	-0.431563	0.0999567	0.300025	-0.526652	-12.0176	-58.7744
349	-0.829568	-0.879337	1.22963	0.207356	-0.727526	-1.51942	-0.424771	1.03281	-0.197666	0.00656916	0.169049	0.0351614	-1.88799	-60.0409
349.5	-0.782839	-0.827552	1.23581	0.22497	-0.779862	-1.55774	-0.145467	1.23697	0.0442313	0.0115438	-0.198119	0.346368	4.18703	-59.9955
350	-0.722775	-0.780296	1.24193	0.242766	-0.855109	-1.58681	0.128052	1.37191	0.253458	0.121023	-0.286925	0.0102511	6.40546	-60.9572
350.5	-0.638843	-0.740516	1.24799	0.260683	-0.905629	-1.60656	0.389332	1.43232	0.39839	0.270857	0.0388262	-0.221004	13.052	-60.5888
351	-0.568361	-0.710432	1.254	0.278472	-0.978867	-1.61699	0.631827	1.41726	0.462859	0.364493	0.408642	0.0728145	22.9452	-61.8609
351.5	-0.566495	-0.691553	1.25995	0.296372	-1.02719	-1.61813	0.849685	1.3298	0.44581	0.326619	0.387121	0.252148	25.0219	-62.9018
352	-0.640288	-0.684727	1.26584	0.314436	-1.09806	-1.61008	1.03834	1.17715	0.360255	0.149385	-0.0355665	-0.132749	14.2895	-66.2304
352.5	-0.731188	-0.690154	1.27168	0.332473	-1.14382	-1.59301	1.19491	0.972348	0.235022	-0.0898531	-0.426605	-0.408991	3.44144	-68.7595
353	-0.784219	-0.707367	1.27745	0.350614	-1.21197	-1.5671	1.3176	0.731178	0.10333	-0.278695	-0.413857	0.0384912	3.47053	-72.2374
353.5	-0.804856	-0.735257	1.28317	0.368535	-1.25481	-1.53262	1.40557	0.469038	-0.0110166	-0.33841	-0.0716225	0.561507	8.79345	-74.0361
354	-0.827244	-0.772159	1.28883	0.386749	-1.31987	-1.48985	1.45883	0.20145	-0.091007	-0.254127	0.248175	0.236789	6.65967	-76.8148
354.5	-0.859135	-0.81597	1.29443	0.404796	-1.35948	-1.43916	1.47796	-0.0564477	-0.125355	-0.0773687	0.312698	-0.5421	-1.10031	-78.2732
355	-0.88436	-0.864297	1.29998	0.423053	-1.42114	-1.38091	1.46422	-0.291631	-0.114142	0.0975376	0.171911	-0.56558	-3.16703	-80.876
355.5	-0.905288	-0.914642	1.30546	0.44106	-1.45719	-1.31555	1.4192	-0.494247	-0.0680485	0.181554	-0.000484357	0.273426	2.85182	-82.2528
356	-0.947986	-0.964604	1.31088	0.45927	-1.51515	-1.24352	1.3452	-0.657286	-0.00506161	0.138074	-0.114167	0.746087	4.64325	-85.0343
356.5	-1.01853	-1.01201	1.31624	0.477329	-1.54736	-1.16531	1.24546	-0.775993	0.056349	0.00309991	-0.174317	0.154197	-4.10308	-86.7526
357	-1.08446	-1.05495	1.32155	0.49552	-1.60134	-1.08146	1.12378	-0.848345	0.0974824	-0.137796	-0.180588	-0.638382	-14.4959	-89.5374
357.5	-1.11119	-1.09179	1.32679	0.513596	-1.62942	-0.992515	0.984483	-0.875017	0.100625	-0.195921	-0.0938596	-0.530319	-13.9155	-90.5498
358	-1.10172	-1.12125	1.33197	0.531654	-1.67914	-0.899033	0.832173	-0.85908	0.0560479	-0.126261	0.0811552	0.263037	-4.67476	-92.157
358.5	-1.0903	-1.14248	1.3371	0.549613	-1.70286	-0.801609	0.672238	-0.805787	-0.0382012	0.0454312	0.224968	0.654239	1.35124	-92.1622
359	-1.10226	-1.15507	1.34216	0.567528	-1.74812	-0.700851	0.510133	-0.721833	-0.172566	0.237264	0.196606	0.206385	-2.83298	-93.3464
359.5	-1.13264	-1.159	1.34716	0.585516	-1.76724	-0.597369	0.350351	-0.614868	-0.322376	0.351711	-0.000844994	-0.453832	-11.218	-93.3844
360	-1.16	-1.15455	1.3521	0.603329	-1.8078	-0.491796	0.196703	-0.49293	-0.455346	0.321978	-0.193581	-0.546952	-15.143	-94.6549
360.5	-1.17035	-1.14228	1.35698	0.621154	-1.82213	-0.384758	0.0519135	-0.363723	-0.53581	0.144656	-0.200477	-0.00893531	-11.4113	-94.5386
361	-1.16729	-1.12309	1.3618	0.638805	-1.85782	-0.27688	-0.0815076	-0.234272	-0.535668	-0.118349	-0.0231979	0.556935	-5.70156	-95.3716
361.5	-1.16415	-1.09816	1.36655	0.656443	-1.86719	-0.168801	-0.20086	-0.111347	-0.445367	-0.369548	0.146507	0.505703	-4.87904	-94.6354
362	-1.16263	-1.06882	1.37125	0.674052	-1.89783	-0.0611383	-0.304294	-0.000903327	-0.271441	-0.515662	0.133311	-0.191675	-10.6434	-94.6879
362.5	-1.13822	-1.0365	1.37588	0.691366	-1.90211	0.0455004	-0.390731	0.0932362	-0.0326457	-0.500412	-0.0303813	-0.753879	-14.0418	-92.8625
363	-1.06305	-1.00272	1.38046	0.708827	-1.9276	0.150504	-0.459736	0.168514	0.2387	-0.330579	-0.1585	-0.387198	-6.16609	-91.4928
363.5	-0.94795	-0.969	1.38497	0.725983	-1.92664	0.253297	-0.512381	0.222139	0.499653	-0.0776069	-0.118164	0.570464	10.2171	-88.3724
364	-0.842649	-0.936708	1.38942	0.74316	-1.94685	0.353303	-0.550787	0.252745	0.70703	0.163984	0.0655758	0.864815	20.4239	-86.4809
364.5	-0.788446	-0.90682	1.3938	0.760156	-1.94059	0.449986	-0.578473	0.261417	0.829697	0.323542	0.237939	-0.0272863	17.1019	-83.7961
365	-0.780176	-0.879793	1.39812	0.777016	-1.95547	0.542818	-0.598757	0.251109	0.846352	0.377356	0.216843	-0.988481	8.66912	-82.8816
365.5	-0.780378	-0.855559	1.40239	0.793786	-1.94383	0.631311	-0.613259	0.227135	0.745217	0.353375	-0.0397814	-0.627542	9.28801	-81.0896
366	-0.771319	-0.833625	1.40659	0.810349	-1.9533	0.714995	-0.622319	0.196513	0.530525	0.306584	-0.36245	0.669547	16.9703	-80.6516
366.5	-0.7663	-0.813207	1.41072	0.826906	-1.93628	0.793447	-0.62722	0.166767	0.228336	0.278891	-0.447937	1.09988	17.935	-78.971
367	-0.769778	-0.793344	1.4148	0.843213	-1.94036	0.866257	-0.628959	0.145121	-0.120622	0.273938	-0.107988	-0.00743502	7.3797	-78.3712
367.5	-0.763446	-0.773024	1.41881	0.859267	-1.91793	0.933068	-0.627611	0.137505	-0.468714	0.251143	0.476849	-1.14653	-0.84133	-76.3343
368	-0.745222	-0.751332	1.42276	0.87521	-1.91659	0.993552	-0.623024	0.148117	-0.765897	0.14963	0.796628	-0.715762	3.64623	-75.5019
368.5	-0.754355	-0.727612	1.42665	0.891068	-1.88877	1.04742	-0.614752	0.178661	-0.968347	-0.0738585	0.428263	0.703588	11.2993	-73.7837
369	-0.820383	-0.701588	1.43047	0.9067	-1.8821	1.09443	-0.602207	0.228106	-1.0443	-0.40497	-0.470641	1.16245	4.17954	-73.6827
369.5	-0.895569	-0.673405	1.43424	0.92211	-1.84895	1.13438	-0.584398	0.293441	-0.976993	-0.751293	-1.13267	0.0645802	-14.4556	-72.0651
370	-0.88471	-0.643603	1.43794	0.937337	-1.83697	1.16708	-0.5607	0.368799	-0.769913	-0.975078	-0.845717	-1.09226	-21.6949	-70.4303
370.5	-0.750711	-0.613063	1.44158	0.952312	-1.79857	1.19243	-0.531424	0.444759	-0.448967	-0.955169	0.279984	-0.80357	-2.26642	-65.9835
371	-0.564282	-0.582926	1.44515	0.967226	-1.78141	1.21034	-0.497078	0.510091	-0.0576586	-0.638418	1.28904	0.509932	29.5722	-61.8241
371.5	-0.439542	-0.554458	1.44866	0.981792	-1.73787	1.22077	-0.458763	0.551639	0.346974	-0.0834642	1.19894	1.11798	45.8666	-56.6387
372	-0.413898	-0.52886	1.45211	0.996339	-1.71563	1.22373	-0.41757	0.557498	0.706465	0.553534	-0.00340216	0.270208	36.2329	-53.5488
372.5	-0.413719	-0.50708	1.4555	1.01044	-1.66709	1.21926	-0.373259	0.521343	0.974763	1.08146	-1.23349	-0.867288	21.2163	-49.8791
373	-0.35834	-0.489666	1.45882	1.02445	-1.63991	1.20744	-0.325276	0.440356	1.11899	1.32606	-1.35045	-0.840284	24.202	-47.7101
373.5	-0.268008	-0.476671	1.46208	1.03808	-1.58655	1.18841	-0.273661	0.3136	1.11898	1.1869	-0.282075	0.2284	43.9416	-44.8581
374	-0.240268	-0.467585	1.46528	1.05164	-1.55464	1.16233	-0.217602	0.144716	0.9738	0.698126	0.952864	0.94161	56.1813	-44.4779
374.5	-0.335111	-0.461303	1.46842	1.06478	-1.49661	1.1294	-0.155769	-0.0569815	0.706228	0.0309028	1.26946	0.448101	44.0792	-44.3664
375	-0.505205	-0.456167	1.47149	1.07776	-1.46018	1.08987	-0.0871549	-0.278186	0.357802	-0.578047	0.505486	-0.575649	15.2319	-46.2509
375.5	-0.634472	-0.450074	1.4745	1.09054	-1.39772	1.04402	-0.0108877	-0.502036	-0.0165881	-0.919007	-0.526844	-0.826197	-5.9022	-46.2856
376	-0.64673	-0.440651	1.47745	1.1029	-1.35698	0.992144	0.0734698	-0.710571	-0.361561	-0.903495	-0.926426	-0.0294737	-6.42547	-45.9272
376.5	-0.565199	-0.425485	1.48034	1.11504	-1.29035	0.934604	0.165039	-0.887649	-0.63266	-0.605535	-0.538541	0.749132	4.89415	-42.8001
377	-0.465646	-0.40242	1.48316	1.12713	-1.24554	0.871756	0.262071	-1.01941	-0.800601	-0.213985	0.0906985	0.541151	10.9644	-40.22
377.5	-0.398328	-0.36987	1.48592	1.13857	-1.175	0.804003	0.362012	-1.09516	-0.854014	0.0643467	0.392574	-0.32139	8.01858	-36.5437
378	-0.357805	-0.327046	1.48862	1.1499	-1.12644	0.731764	0.462102	-1.10748	-0.798893	0.110862	0.300453	-0.72391	4.86985	-34.4452
378.5	-0.31214	-0.274003	1.49126	1.16104	-1.05228	0.655476	0.560118	-1.05211	-0.655797	-0.0445067	0.132582	-0.210418	9.85374	-31.1687
379	-0.244657	-0.211534	1.49383	1.17169	-1.00024	0.575607	0.653735	-0.92907	-0.455448	-0.246032	0.0989873	0.51348	18.7654	-28.7909
379.5	-0.16051	-0.141015	1.49635	1.18205	-0.922798	0.492628	0.739973	-0.743449	-0.233134	-0.301598	0.0825765	0.558792	23.5139	-24.6384
380	-0.0642739	-0.0642877	1.4988	1.19224	-0.867619	0.407029	0.81592	-0.504821	-0.0234307	-0.0915369	-0.0959674	-0.0536837	22.7694	-21.0836
380.5	0.0499991	0.0164103	1.50119	1.20208	-0.787178	0.319311	0.878312	-0.226799	0.145986	0.352323	-0.359163	-0.54844	24.7762	-15.7352
381	0.184276	0.0985043	1.50352	1.21154	-0.72922	0.229991	0.924075	0.0740794	0.258121	0.845176	-0.425968	-0.386159	35.0515	-11.4052
381.5	0.316439	0.179171	1.50579	1.22076	-0.646182	0.139569	0.950693	0.379315	0.308097	1.12759	-0.159011	0.189932	50.1655	-6.34651
382	0.402373	0.255457	1.508	1.2296	-0.585799	0.0485669	0.95617	0.669718	0.302535	0.99274	0.248103	0.533125	59.0276	-3.8281
382.5	0.407723	0.324448	1.51014	1.23808	-0.500531	-0.0424986	0.93968	0.927163	0.255706	0.403736	0.475219	0.291912	54.9861	-1.77699
383	0.344089	0.383476	1.51222	1.2462	-0.438097	-0.133117	0.901263	1.13585	0.188563	-0.460492	0.401523	-0.283649	40.7027	-2.24854
383.5	0.275024	0.430377	1.51425	1.25401	-0.350986	-0.22279	0.842024	1.28485	0.130144	-1.253	0.179048	-0.561327	28.1623	-1.68779
384	0.264059	0.463716	1.51621	1.26153	-0.286881	-0.311009	0.763595	1.36613	0.103637	-1.6182	-0.0525998	-0.19491	25.4752	-1.46654
384.5	0.323122	0.482927	1.51812	1.26859	-0.198313	-0.397291	0.667194	1.37302	0.116613	-1.366	-0.330332	0.425977	30.7757	1.29581
385	0.423378	0.48834	1.51996	1.27537	-0.132992	-0.481166	0.554223	1.30312	0.165906	-0.555612	-0.629498	0.576927	35.9624	3.9188
385.5	0.533053	0.481117	1.52174	1.28191	-0.0434061	-0.562177	0.426292	1.15856	0.235609	0.512304	-0.687033	0.0231917	38.67	8.21162
386	0.639788	0.463131	1.52347	1.28789	0.0227391	-0.639879	0.285584	0.946037	0.302124	1.41475	-0.197726	-0.605049	43.3993	10.8893
386.5	0.721174	0.436858	1.52513	1.29366	0.11295	-0.713857	0.134186	0.674618	0.336783	1.77411	0.703417	-0.517789	53.232	13.4408
387	0.721977	0.405262	1.52673	1.29887	0.17949	-0.783712	-0.0249841	0.358085	0.317098	1.43605	1.34737	0.249505	59.0449	12.6184
387.5	0.586486	0.371651	1.52827	1.3038	0.269908	-0.849072	-0.187995	0.0162822	0.237929	0.548724	1.05163	0.763472	46.8295	10.8263
388	0.326131	0.339497	1.52975	1.30835	0.336389	-0.909587	-0.35064	-0.328892	0.105492	-0.51642	-0.203291	0.30309	12.7425	6.60018
388.5	0.0616976	0.312231	1.53118	1.31261	0.426543	-0.964933	-0.507465	-0.653564	-0.0606819	-1.31782	-1.52376	-0.5766	-23.3449	4.35255
389	-0.0523621	0.293069	1.53255	1.31633	0.492592	-1.01482	-0.652811	-0.934349	-0.232339	-1.53736	-1.77417	-0.717014	-35.214	3.49147
389.5	0.0378953	0.284872	1.53385	1.31992	0.58206	-1.05898	-0.782418	-1.15333	-0.384618	-1.12822	-0.635424	0.0527776	-16.5437	6.96767
390	0.243879	0.290029	1.5351	1.32293	0.647206	-1.09719	-0.89301	-1.29779	-0.49688	-0.314625	1.0521	0.724293	11.8213	11.1998
390.5	0.412299	0.310344	1.53629	1.32561	0.735549	-1.12924	-0.983198	-1.36261	-0.559176	0.512681	1.9346	0.447429	24.5792	16.723
391	0.458318	0.346928	1.53742	1.32791	0.799356	-1.15498	-1.05204	-1.34711	-0.565686	0.993671	1.3286	-0.359257	15.0789	19.7816
391.5	0.418076	0.400065	1.5385	1.32977	0.886159	-1.17425	-1.0975	-1.25194	-0.509369	0.967945	-0.207416	-0.641164	-1.5927	22.9193
392	0.384885	0.469091	1.53952	1.33127	0.948234	-1.18698	-1.11789	-1.0824	-0.391011	0.51221	-1.45794	-0.128463	-10.3345	24.6658
392.5	0.427197	0.552346	1.54048	1.33221	1.03306	-1.19309	-1.11247	-0.849431	-0.223502	-0.121282	-1.5741	0.468713	-6.99418	28.5187
393	0.555965	0.647285	1.54137	1.33297	1.09295	-1.19255	-1.08117	-0.567992	-0.0269619	-0.628355	-0.627159	0.467698	3.10803	32.5903
393.5	0.736968	0.750755	1.54222	1.33308	1.17542	-1.18537	-1.02517	-0.256344	0.175477	-0.793018	0.605586	-0.0625546	15.0933	39.2901
394	0.920779	0.859359	1.54301	1.33304	1.23273	-1.17158	-0.946723	0.0641997	0.357382	-0.576471	1.29019	-0.514625	26.1115	45.6571
394.5	1.07137	0.969815	1.54374	1.33258	1.31241	-1.15127	-0.848931	0.37089	0.490413	-0.113439	1.07171	-0.380339	36.2777	53.4649
395	1.18275	1.07923	1.54442	1.33151	1.36673	-1.12453	-0.734552	0.644326	0.55487	0.380591	0.215935	0.257852	44.3715	59.7121
395.5	1.26449	1.18525	1.54504	1.33006	1.44324	-1.09151	-0.606363	0.868185	0.543671	0.70321	-0.678418	0.640066	46.9718	66.5128
396	1.33316	1.28614	1.54561	1.32832	1.49423	-1.05238	-0.467321	1.0294	0.46037	0.743759	-1.07298	0.187694	41.967	71.3163
396.5	1.41191	1.38066	1.54611	1.32616	1.56721	-1.00732	-0.319565	1.12023	0.316897	0.52135	-0.756075	-0.574846	37.4015	76.7897
397	1.50927	1.46802	1.54657	1.32354	1.6145	-0.956593	-0.165055	1.13772	0.133118	0.152083	0.0432189	-0.599901	42.292	80.759
397.5	1.59948	1.5478	1.54697	1.3205	1.68358	-0.900431	-0.00627602	1.0833	-0.0644742	-0.21769	0.775954	0.208317	54.2975	85.7489
398	1.64289	1.61996	1.54732	1.31704	1.7268	-0.839134	0.15396	0.962775	-0.247284	-0.47315	0.929669	0.761474	58.3946	89.1892
398.5	1.63514	1.68491	1.54761	1.31319	1.79167	-0.773011	0.313094	0.786167	-0.388438	-0.563454	0.407861	0.279574	47.1426	93.5691
399	1.62357	1.74347	1.54784	1.30902	1.83053	-0.702392	0.468559	0.566592	-0.468321	-0.503716	-0.380543	-0.584854	30.8271	96.7829
399.5	1.6675	1.79681	1.54802	1.30425	1.89089	-0.627636	0.618308	0.320094	-0.477373	-0.344955	-0.813921	-0.63386	27.8382	101.738
400	1.7791	1.84625	1.54815	1.29916	1.92506	-0.549131	0.760208	0.0635976	-0.417895	-0.144408	-0.569664	0.176223	40.913	106.07
400.5	1.91034	1.89312	1.54823	1.29365	1.98063	-0.467263	0.890402	-0.188364	-0.303277	0.0458272	0.0838755	0.681029	55.6474	111.781
401	2.00612	1.93861	1.54825	1.28773	2.00989	-0.382455	1.00485	-0.422648	-0.155088	0.194201	0.557789	0.227385	58.6991	115.846
401.5	2.05382	1.98369	1.54822	1.28129	2.06041	-0.295134	1.10078	-0.625998	0.00174807	0.292846	0.487984	-0.454909	53.9723	120.532
402	2.07484	2.02902	1.54814	1.2746	2.0845	-0.205752	1.17577	-0.786957	0.142658	0.336482	0.0174691	-0.44688	51.4003	123.536
402.5	2.09323	2.07493	1.54801	1.26738	2.12977	-0.114761	1.22798	-0.896856	0.245009	0.314742	-0.379489	0.117509	54.5929	127.538
403	2.12128	2.12131	1.54782	1.25983	2.14849	-0.022629	1.2563	-0.949566	0.295028	0.224126	-0.344267	0.439488	58.5463	130.176
403.5	2.15704	2.16775	1.54758	1.25192	2.18829	0.0701744	1.25938	-0.942791	0.29128	0.0769118	0.0391492	0.175461	59.5735	133.832
404	2.18995	2.21359	1.5473	1.24358	2.2015	0.163157	1.23629	-0.87798	0.24201	-0.0909305	0.354886	-0.257297	57.625	135.92
404.5	2.21458	2.25804	1.54695	1.23469	2.23567	0.25584	1.18763	-0.758716	0.164539	-0.219514	0.286181	-0.32684	56.0643	138.926
405	2.23682	2.30022	1.54656	1.22545	2.2432	0.347736	1.1147	-0.591528	0.0798942	-0.254197	-0.101008	-0.0113667	55.9944	140.596
405.5	2.27126	2.33916	1.54613	1.21575	2.27167	0.438361	1.019	-0.386355	0.00596786	-0.178264	-0.440309	0.289836	57.8178	143.609
406	2.33129	2.37386	1.54564	1.20575	2.2734	0.527238	0.902526	-0.15499	-0.042831	-0.020513	-0.393862	0.24825	60.9061	145.592
406.5	2.41198	2.40327	1.5451	1.19528	2.29604	0.613891	0.767448	0.0893344	-0.0573974	0.151479	0.0352218	-0.095418	65.4098	148.806
407	2.48771	2.42633	1.54451	1.18434	2.29193	0.69784	0.616115	0.332288	-0.0365454	0.256983	0.494065	-0.353347	70.2818	150.365
407.5	2.52641	2.44198	1.54387	1.17326	2.30871	0.778634	0.450724	0.55868	0.0121297	0.236241	0.577635	-0.174517	74.6537	152.298
408	2.51078	2.44923	1.54318	1.16159	2.29872	0.855828	0.273997	0.754586	0.0744913	0.0854949	0.185365	0.283236	75.165	151.987
408.5	2.45245	2.4473	1.54244	1.1496	2.3096	0.928987	0.0900403	0.909765	0.135486	-0.130366	-0.376996	0.41252	69.7108	152.142
409	2.38739	2.4358	1.54166	1.13711	2.29371	0.997705	-0.0966981	1.01646	0.179617	-0.314445	-0.671008	-0.061571	60.2254	150.769
409.5	2.35701	2.41477	1.54083	1.12434	2.29872	1.06158	-0.28216	1.06849	0.191541	-0.387812	-0.480467	-0.523814	56.1125	150.722
410	2.3792	2.38474	1.53995	1.11116	2.27702	1.12025	-0.461902	1.06354	0.163184	-0.313475	0.0676004	-0.219303	63.4803	149.656
410.5	2.4159	2.34671	1.53903	1.09747	2.27622	1.17336	-0.632301	1.00062	0.0933257	-0.123809	0.581424	0.459598	74.6493	149.667
411	2.40659	2.30207	1.53806	1.08347	2.24871	1.22059	-0.78993	0.881729	-0.0103201	0.102593	0.695319	0.468251	74.3848	147.783
411.5	2.33002	2.25255	1.53704	1.06919	2.2422	1.26166	-0.931286	0.712831	-0.130589	0.281362	0.323475	-0.262488	61.034	146.264
412	2.21968	2.20005	1.53598	1.05437	2.20904	1.29629	-1.05312	0.502842	-0.245344	0.354441	-0.292006	-0.627756	47.3474	142.877
412.5	2.12184	2.14652	1.53487	1.03941	2.19693	1.32428	-1.15238	0.263267	-0.331446	0.312719	-0.725193	-0.012873	44.4959	140.513
413	2.04992	2.09385	1.53371	1.02406	2.15824	1.34542	-1.22632	0.00728018	-0.370295	0.192485	-0.649393	0.67525	46.9044	137.005
413.5	1.991	2.04385	1.53252	1.00811	2.14068	1.35956	-1.27231	-0.251409	-0.355133	0.0510172	-0.0909232	0.341929	44.6403	134.9
414	1.94344	1.99817	1.53127	0.991909	2.09667	1.36657	-1.28833	-0.498764	-0.28765	-0.0557024	0.561738	-0.558481	38.5922	131.765
414.5	1.91758	1.95825	1.52998	0.975358	2.07385	1.36638	-1.27359	-0.721477	-0.175623	-0.0968162	0.812401	-0.657031	38.3342	130.03
415	1.90339	1.9252	1.52865	0.958496	2.02471	1.35895	-1.22848	-0.908884	-0.0359488	-0.0846928	0.431779	0.225452	42.7004	127.096
415.5	1.87942	1.89975	1.52727	0.941336	1.99685	1.34429	-1.15399	-1.05118	0.112066	-0.0524281	-0.294994	0.818161	41.8739	125.354
416	1.8468	1.88221	1.52586	0.923689	1.94281	1.32242	-1.05171	-1.1404	0.248086	-0.0367163	-0.780913	0.255498	32.0863	122.505
416.5	1.83514	1.87244	1.5244	0.905812	1.91018	1.29346	-0.92447	-1.17209	0.352974	-0.0633083	-0.641926	-0.699428	24.856	121.235
417	1.86804	1.86988	1.52289	0.887555	1.85151	1.25751	-0.77523	-1.14369	0.411678	-0.122908	-0.00802912	-0.703625	31.7766	119.155
417.5	1.91931	1.87347	1.52135	0.868932	1.81439	1.21475	-0.607785	-1.0571	0.411728	-0.185803	0.5758	0.257483	48.1375	118.402
418	1.93996	1.88179	1.51977	0.850146	1.75135	1.1654	-0.426316	-0.916718	0.350904	-0.206799	0.65542	0.899586	56.4274	116.15
418.5	1.91766	1.89316	1.51814	0.830769	1.71007	1.1097	-0.234107	-0.728084	0.237911	-0.144764	0.249836	0.369366	49.1884	114.847
419	1.88907	1.90587	1.51647	0.811367	1.643	1.04795	-0.0346457	-0.499491	0.0890391	0.00232688	-0.25879	-0.688628	36.286	112.339
419.5	1.89877	1.91815	1.51477	0.791481	1.59787	0.980494	0.167681	-0.241352	-0.0716137	0.189589	-0.501383	-0.911159	35.1637	111.341
420	1.94668	1.9281	1.51302	0.77134	1.52711	0.907691	0.368092	0.0343016	-0.217478	0.339421	-0.39182	0.0758497	49.2753	109.263
420.5	1.98379	1.93364	1.51123	0.750904	1.47849	0.829949	0.561151	0.3139	-0.323372	0.371058	-0.0935697	1.06676	64.6649	108.07
421	1.96298	1.93253	1.5094	0.730179	1.40442	0.747705	0.741478	0.582499	-0.373535	0.23702	0.192914	0.694021	64.661	104.827
421.5	1.89373	1.92249	1.50753	0.709115	1.35266	0.661435	0.905425	0.826859	-0.364433	-0.0343491	0.377358	-0.675807	52.658	101.993
422	1.8233	1.90129	1.50563	0.687808	1.27567	0.571633	1.05006	1.03536	-0.301194	-0.342554	0.405109	-1.24846	46.3908	97.4892
422.5	1.77629	1.86678	1.50369	0.666278	1.22116	0.478831	1.17163	1.19765	-0.191944	-0.553221	0.200641	-0.139539	55.5518	94.1093
423	1.73507	1.81707	1.50171	0.644461	1.14162	0.383567	1.26696	1.30546	-0.0513544	-0.552432	-0.207853	1.28071	67.1285	89.4781
423.5	1.68005	1.75063	1.49969	0.622426	1.08479	0.286408	1.33432	1.35221	0.0965574	-0.304826	-0.573504	1.02807	64.2615	85.9954
424	1.63481	1.66651	1.49764	0.600072	1.00316	0.187935	1.37253	1.33437	0.228334	0.126832	-0.548701	-0.703286	50.9889	81.2342
424.5	1.63353	1.56436	1.49555	0.577423	0.944401	0.088729	1.38052	1.25188	0.326532	0.596047	-0.042549	-1.57424	50.4429	77.5823
425	1.64693	1.44448	1.49342	0.554596	0.861039	-0.0106055	1.35813	1.10779	0.379067	0.92174	0.57431	-0.270679	69.688	72.0436
425.5	1.57492	1.30781	1.49126	0.531491	0.800806	-0.109482	1.30565	0.907048	0.378605	0.953521	0.735491	1.48902	84.8341	66.1459
426	1.34691	1.15598	1.48906	0.508232	0.716169	-0.207285	1.22413	0.657705	0.326325	0.642913	0.252196	1.21984	68.2928	56.9469
426.5	1.01796	0.991368	1.48683	0.484719	0.654887	-0.303438	1.11684	0.373732	0.237195	0.086923	-0.420786	-0.759379	29.5753	47.6062
427	0.718682	0.816899	1.48456	0.460912	0.569402	-0.397357	0.988082	0.0721771	0.131976	-0.517013	-0.649403	-1.69426	4.49075	37.0621
427.5	0.518596	0.635944	1.48226	0.437044	0.507484	-0.488471	0.841853	-0.230219	0.0280832	-0.95837	-0.280751	-0.275361	10.6355	28.721
428	0.371669	0.452135	1.47993	0.412818	0.421616	-0.576237	0.681817	-0.518354	-0.0619689	-1.09288	0.240638	1.4899	24.7728	20.1047
428.5	0.202981	0.269256	1.47756	0.3885	0.359504	-0.660126	0.511784	-0.778336	-0.130356	-0.888352	0.388033	1.14726	18.1547	13.2423
429	0.0101802	0.0911056	1.47515	0.364019	0.27363	-0.739642	0.335789	-0.997721	-0.17456	-0.430912	0.105293	-0.7567	-5.4565	5.58311
429.5	-0.146648	-0.0787203	1.47272	0.339301	0.211768	-0.81432	0.15811	-1.16552	-0.195833	0.114531	-0.189288	-1.52815	-15.9669	-0.165857
430	-0.240544	-0.237073	1.47025	0.314328	0.126363	-0.883721	-0.0169838	-1.27281	-0.197888	0.568103	-0.128816	-0.158757	-1.79933	-6.50266
430.5	-0.326389	-0.381427	1.46776	0.289376	0.0651392	-0.94745	-0.186044	-1.31634	-0.192889	0.783789	0.145638	1.3241	14.3308	-11.6483
431	-0.46373	-0.50997	1.46522	0.26414	-0.0193878	-1.00515	-0.345899	-1.29584	-0.191046	0.713994	0.222111	0.887391	6.95533	-18.6656
431.5	-0.632967	-0.621654	1.46266	0.238833	-0.0795388	-1.05652	-0.492236	-1.21056	-0.190953	0.435806	-0.0248771	-0.688385	-16.0578	-24.8309
432	-0.769226	-0.716273	1.46007	0.213325	-0.162813	-1.10128	-0.621535	-1.06399	-0.188006	0.0862694	-0.320911	-1.1959	-28.9477	-31.7718
432.5	-0.841883	-0.794485	1.45744	0.187653	-0.221516	-1.13921	-0.731733	-0.864481	-0.177195	-0.202401	-0.317643	-0.0901696	-20.9925	-36.3995
433	-0.877631	-0.857694	1.45479	0.161866	-0.303129	-1.17014	-0.821196	-0.622523	-0.152747	-0.342664	0.020735	1.02671	-7.48298	-41.1188
433.5	-0.919795	-0.907783	1.45211	0.136038	-0.359976	-1.19394	-0.889258	-0.351405	-0.111245	-0.323606	0.355119	0.693885	-5.92281	-43.8659
434	-0.973157	-0.946869	1.44939	0.110032	-0.439565	-1.21055	-0.936003	-0.0661138	-0.0523965	-0.198957	0.346716	-0.522746	-15.2019	-47.4341
434.5	-1.00634	-0.977161	1.44665	0.0840048	-0.494194	-1.21993	-0.961923	0.217487	0.0192583	-0.051908	0.0204061	-0.946372	-18.8651	-49.4324
435	-1.00049	-1.00088	1.44388	0.0579531	-0.571418	-1.22211	-0.968128	0.483531	0.095657	0.0478571	-0.280252	-0.0728524	-9.85876	-52.3039
435.5	-0.978941	-1.02016	1.44108	0.0316413	-0.623514	-1.21716	-0.95702	0.716786	0.168034	0.0724089	-0.280781	0.828615	1.80092	-53.734
436	-0.978498	-1.03681	1.43826	0.00531467	-0.698023	-1.20522	-0.931359	0.903978	0.22615	0.0396473	-0.0497245	0.524621	2.53639	-56.4141
436.5	-1.00259	-1.05228	1.4354	-0.0212633	-0.74727	-1.18644	-0.892867	1.03535	0.258128	-0.00416717	0.133208	-0.486917	-4.76836	-57.9572
437	-1.02333	-1.06761	1.43252	-0.0477098	-0.818788	-1.16103	-0.8432	1.10481	0.255135	-0.0193908	0.112323	-0.739936	-7.25272	-60.6906
437.5	-1.02583	-1.0835	1.42961	-0.0742658	-0.864882	-1.12926	-0.784102	1.11001	0.212229	0.000552933	0.0025371	0.0982947	0.00724474	-62.0622
438	-1.0318	-1.1003	1.42668	-0.100882	-0.933102	-1.09142	-0.717145	1.05262	0.13168	0.0283813	0.000915322	0.757149	5.54871	-64.633
438.5	-1.07143	-1.11797	1.42372	-0.127413	-0.975781	-1.04785	-0.643635	0.938191	0.0231597	0.0228071	0.110338	0.245793	-0.306729	-66.1462
439	-1.14237	-1.13616	1.42073	-0.154096	-1.04047	-0.998908	-0.564759	0.775637	-0.0968445	-0.0412821	0.132904	-0.649035	-12.1613	-69.1052
439.5	-1.21212	-1.15434	1.41772	-0.180643	-1.07951	-0.945008	-0.481962	0.576515	-0.203793	-0.149097	-0.0550211	-0.537192	-16.3799	-70.8539
440	-1.25723	-1.17191	1.41469	-0.207423	-1.14045	-0.886572	-0.396356	0.353975	-0.27398	-0.248078	-0.305154	0.438545	-12.5081	-73.5593
440.5	-1.27805	-1.18819	1.41162	-0.234194	-1.17563	-0.824064	-0.308546	0.121831	-0.293177	-0.272351	-0.325199	0.768799	-11.3091	-74.5226
441	-1.27527	-1.20233	1.40853	-0.260828	-1.23261	-0.757959	-0.219067	-0.10632	-0.256624	-0.175355	-0.0126394	-0.118635	-17.3151	-76.0339
441.5	-1.24024	-1.21335	1.40542	-0.287524	-1.26375	-0.688753	-0.129441	-0.318292	-0.168481	0.0399847	0.378302	-0.899399	-19.3193	-75.6277
442	-1.17973	-1.22021	1.40229	-0.314136	-1.31662	-0.616968	-0.0413929	-0.503754	-0.04351	0.312277	0.468351	-0.31194	-9.65401	-76.017
442.5	-1.13243	-1.22191	1.39913	-0.340722	-1.34355	-0.543115	0.0436576	-0.654707	0.0943057	0.538386	0.14389	0.835208	1.72485	-75.2137
443	-1.13266	-1.21756	1.39595	-0.367381	-1.39218	-0.467738	0.124402	-0.765327	0.217419	0.617519	-0.309042	0.778816	-1.67556	-76.0182
443.5	-1.16341	-1.20636	1.39275	-0.394006	-1.4148	-0.39135	0.199959	-0.831141	0.301477	0.50104	-0.479588	-0.501079	-16.1675	-75.883
444	-1.17651	-1.1877	1.38952	-0.420501	-1.45907	-0.314498	0.269628	-0.849933	0.328283	0.210003	-0.25038	-1.13094	-22.279	-76.9532
444.5	-1.15594	-1.16136	1.38627	-0.446863	-1.4773	-0.237704	0.33336	-0.822137	0.286444	-0.170625	0.117019	-0.0844773	-11.1601	-76.6213
445	-1.13467	-1.12754	1.383	-0.473192	-1.51712	-0.161484	0.391165	-0.750349	0.178032	-0.51592	0.303743	1.18769	0.255592	-77.4119
445.5	-1.13995	-1.08691	1.37971	-0.499464	-1.53089	-0.0863473	0.443616	-0.639116	0.018015	-0.705682	0.247297	0.778873	-5.93986	-76.8169
446	-1.14302	-1.04044	1.3764	-0.525578	-1.56624	-0.0127783	0.491383	-0.494974	-0.1669	-0.669957	0.111056	-0.833507	-22.911	-76.9327
446.5	-1.09052	-0.98947	1.37307	-0.551687	-1.5755	0.0587439	0.534579	-0.326025	-0.340198	-0.417674	0.0154896	-1.34038	-25.6959	-74.9429
447	-0.980396	-0.935669	1.36971	-0.577841	-1.60631	0.127784	0.573158	-0.141757	-0.464322	-0.0403188	-0.0991731	0.0882309	-7.70834	-73.4589
447.5	-0.874031	-0.881104	1.36634	-0.603633	-1.61108	0.193907	0.605582	0.0461021	-0.508109	0.31301	-0.306409	1.47472	9.70427	-70.7049
448	-0.816828	-0.828092	1.36295	-0.629254	-1.63737	0.256726	0.630166	0.225508	-0.454072	0.497571	-0.446367	0.799903	6.05755	-69.6891
448.5	-0.780441	-0.779012	1.35953	-0.654932	-1.63765	0.315868	0.645992	0.386034	-0.302008	0.438307	-0.224727	-1.04895	-7.22535	-67.917
449	-0.715056	-0.736123	1.3561	-0.680479	-1.65946	0.371012	0.652305	0.518709	-0.0706121	0.160849	0.364396	-1.46589	-4.53071	-67.5387
449.5	-0.637133	-0.701436	1.35265	-0.705668	-1.65525	0.421859	0.648709	0.616245	0.203729	-0.214939	0.843047	0.17975	16.9013	-66.1153
450	-0.620307	-0.67654	1.34917	-0.730998	-1.67264	0.468144	0.635152	0.673385	0.472291	-0.519962	0.64295	1.60458	29.2208	-66.411
450.5	-0.687334	-0.662413	1.34569	-0.756017	-1.66405	0.509649	0.612219	0.687606	0.682079	-0.601556	-0.238294	0.811708	13.8903	-65.918
451	-0.751882	-0.659251	1.34218	-0.780948	-1.67705	0.54619	0.580639	0.659404	0.787637	-0.38804	-1.06894	-1.11055	-11.0948	-66.3914
451.5	-0.704069	-0.666436	1.33865	-0.805482	-1.66413	0.57762	0.540971	0.592607	0.763473	0.0781143	-1.0086	-1.50386	-10.9063	-64.6686
452	-0.54817	-0.682593	1.33511	-0.830026	-1.67287	0.603837	0.493876	0.493397	0.605417	0.645859	0.0137171	0.174832	18.6315	-63.4708
452.5	-0.427793	-0.705701	1.33155	-0.854336	-1.65571	0.624779	0.438756	0.365803	0.321524	1.08841	1.07518	1.57081	43.0677	-61.7721
453	-0.473478	-0.733254	1.32798	-0.878252	-1.6603	0.640412	0.375215	0.215767	-0.0552995	1.21498	1.16223	0.778278	31.2101	-63.317
453.5	-0.661817	-0.76256	1.32438	-0.902309	-1.63902	0.650762	0.305014	0.0557354	-0.459387	0.969664	0.214693	-1.00597	-4.86437	-65.5081
454	-0.865154	-0.791152	1.32078	-0.925949	-1.63957	0.655875	0.230191	-0.101079	-0.815766	0.420134	-0.882668	-1.32731	-30.6536	-69.5743
454.5	-0.988381	-0.817157	1.31714	-0.949419	-1.61431	0.655844	0.152339	-0.242958	-1.05672	-0.279805	-1.15183	0.137688	-30.3203	-71.8217
455	-1.03656	-0.839451	1.31351	-0.972591	-1.61093	0.65079	0.0729349	-0.359959	-1.13183	-0.943272	-0.39678	1.29952	-20.7862	-74.2092
455.5	-1.06508	-0.857597	1.30985	-0.995576	-1.58186	0.640874	-0.0069894	-0.444812	-1.01579	-1.40917	0.665198	0.624457	-22.1382	-74.4137
456	-1.09607	-0.871693	1.30617	-1.0182	-1.57473	0.626292	-0.0864861	-0.493004	-0.715658	-1.57822	1.09245	-0.825513	-32.6689	-75.0843
456.5	-1.10346	-0.882265	1.30249	-1.04079	-1.54198	0.607271	-0.164042	-0.503008	-0.275117	-1.4245	0.542142	-1.01851	-35.1604	-73.7291
457	-1.05766	-0.890155	1.29878	-1.0628	-1.53126	0.58405	-0.238208	-0.47641	0.235262	-0.983145	-0.480622	0.189109	-24.6524	-72.6767
457.5	-0.956155	-0.896366	1.29507	-1.0849	-1.495	0.55691	-0.307984	-0.417648	0.73266	-0.329986	-1.09412	0.99938	-11.4562	-69.4849
458	-0.814689	-0.901855	1.29133	-1.10641	-1.48088	0.526156	-0.372962	-0.333725	1.13389	0.428273	-0.780486	0.329573	-3.65244	-66.859
458.5	-0.657706	-0.907384	1.28758	-1.1278	-1.44131	0.492101	-0.433299	-0.233621	1.36781	1.15755	0.211586	-0.730485	5.50115	-62.8775
459	-0.529642	-0.913454	1.28383	-1.14887	-1.42396	0.455098	-0.489106	-0.126287	1.38965	1.71121	1.08965	-0.631806	21.0941	-60.8032
459.5	-0.500166	-0.920278	1.28005	-1.16958	-1.38125	0.415491	-0.540331	-0.0207033	1.18795	1.94584	1.11746	0.36176	31.9669	-59.0968
460	-0.616007	-0.927734	1.27627	-1.19008	-1.36085	0.373654	-0.586531	0.0754445	0.787886	1.76021	0.194675	0.721308	20.5199	-60.7012
460.5	-0.833613	-0.935326	1.27246	-1.21024	-1.31522	0.32996	-0.625867	0.160221	0.257339	1.15907	-0.97139	0.0236418	-9.20013	-62.6188
461	-1.04761	-0.942248	1.26865	-1.23007	-1.292	0.284803	-0.655773	0.233226	-0.315213	0.252188	-1.42832	-0.620253	-35.0277	-66.1024
461.5	-1.17433	-0.947549	1.26482	-1.24947	-1.24365	0.238571	-0.673532	0.294045	-0.839278	-0.759971	-0.732428	-0.305984	-40.0687	-67.5973
462	-1.21028	-0.95029	1.26099	-1.26866	-1.21782	0.191647	-0.67721	0.342587	-1.2316	-1.62372	0.658124	0.408544	-31.5712	-69.0864
462.5	-1.212	-0.949629	1.25713	-1.2874	-1.16696	0.144425	-0.665922	0.378211	-1.43078	-2.10502	1.64866	0.440821	-27.8682	-68.2027
463	-1.21989	-0.944887	1.25327	-1.30593	-1.13873	0.0972849	-0.639222	0.399705	-1.40804	-2.0639	1.35048	-0.192405	-36.475	-67.5428
463.5	-1.21234	-0.935668	1.24939	-1.32399	-1.08557	0.050604	-0.59739	0.40524	-1.17043	-1.50775	-0.128831	-0.484849	-45.9357	-64.497
464	-1.13242	-0.922014	1.2455	-1.34184	-1.05516	0.00474979	-0.541246	0.392621	-0.759774	-0.597435	-1.65447	-0.00320386	-43.1025	-61.2611
464.5	-0.951309	-0.904458	1.24161	-1.35925	-0.99995	-0.0399333	-0.472497	0.359315	-0.244449	0.400084	-1.93645	0.475185	-25.7634	-55.4964
465	-0.705712	-0.883913	1.23769	-1.37621	-0.967601	-0.0830995	-0.393531	0.302869	0.291004	1.20125	-0.635783	0.188044	-2.3536	-50.4518
465.5	-0.488724	-0.861455	1.23377	-1.39282	-0.910567	-0.124436	-0.307689	0.220238	0.755399	1.59571	1.2455	-0.441325	18.7378	-44.9996
466	-0.396627	-0.838078	1.22984	-1.40911	-0.876486	-0.16364	-0.218645	0.110013	1.07185	1.5222	2.16831	-0.423208	30.1113	-42.7772
466.5	-0.464247	-0.814472	1.2259	-1.42504	-0.817861	-0.200428	-0.128441	-0.0229637	1.19874	1.09531	1.38692	0.314282	26.264	-41.5651
467	-0.644894	-0.790809	1.22194	-1.44031	-0.782337	-0.234545	-0.0386772	-0.170778	1.12785	0.523339	-0.464977	0.671217	4.12714	-43.0051
467.5	-0.823706	-0.766591	1.21798	-1.45553	-0.722353	-0.265758	0.0497745	-0.322062	0.885671	0.0151487	-1.89322	0.0208854	-24.6946	-43.1482
468	-0.890831	-0.740673	1.214	-1.4702	-0.685602	-0.293849	0.136155	-0.464257	0.525006	-0.312047	-1.79694	-0.759383	-39.0711	-43.2094
468.5	-0.829003	-0.711526	1.21002	-1.48437	-0.624504	-0.318653	0.219288	-0.585828	0.112276	-0.468066	-0.353239	-0.493249	-27.8633	-40.573
469	-0.727765	-0.677633	1.20602	-1.4983	-0.586766	-0.34	0.298026	-0.676275	-0.282418	-0.545997	1.21959	0.542584	-6.63528	-38.5847
469.5	-0.701183	-0.637827	1.20201	-1.51175	-0.524802	-0.35777	0.370515	-0.728671	-0.600313	-0.651331	1.69826	0.86911	-2.3474	-35.892
470	-0.768396	-0.591441	1.198	-1.52465	-0.486324	-0.371872	0.434987	-0.738306	-0.799274	-0.812114	0.84935	-0.0637481	-23.1395	-35.1617
470.5	-0.825709	-0.538316	1.19397	-1.53724	-0.423762	-0.382233	0.491575	-0.699183	-0.851695	-0.928616	-0.458326	-0.950723	-45.4623	-32.902
471	-0.761628	-0.47878	1.18994	-1.54942	-0.384776	-0.388817	0.540552	-0.608477	-0.755812	-0.843279	-1.15508	-0.495636	-44.5081	-30.3156
471.5	-0.571777	-0.413649	1.18589	-1.56104	-0.321819	-0.39162	0.580011	-0.471195	-0.542325	-0.458557	-0.898448	0.667137	-22.1197	-24.6457
472	-0.333565	-0.344197	1.18184	-1.57226	-0.282599	-0.390661	0.607611	-0.296484	-0.260871	0.201398	-0.136231	0.901491	-0.467626	-19.0399
472.5	-0.113872	-0.272096	1.17778	-1.583	-0.219511	-0.385997	0.621706	-0.0958143	0.032257	0.970206	0.455789	-0.133565	8.39848	-12.1005
473	0.0683906	-0.19933	1.17371	-1.59353	-0.18028	-0.377709	0.620845	0.116982	0.282161	1.57618	0.539344	-1.01172	11.4599	-7.20473
473.5	0.206334	-0.128117	1.16963	-1.60329	-0.117312	-0.365902	0.604133	0.327757	0.444777	1.75103	0.272466	-0.476294	20.0698	-2.48431
474	0.262218	-0.0607891	1.16554	-1.61285	-0.0783083	-0.350718	0.571041	0.522243	0.494757	1.3493	0.0124403	0.760993	28.3443	-0.748226
474.5	0.200544	0.000411439	1.16144	-1.62171	-0.0157174	-0.33231	0.522461	0.690008	0.436224	0.447554	-0.0249223	0.98112	22.4415	0.560162
475	0.0418675	0.0535617	1.15734	-1.63019	0.022824	-0.310873	0.459987	0.822612	0.294424	-0.675549	0.0491192	-0.19126	-0.0157377	-0.386022
475.5	-0.123158	0.0972003	1.15322	-1.63833	0.0848425	-0.286611	0.386531	0.913946	0.109288	-1.63296	-0.00828506	-1.15882	-20.7719	-0.0203266
476	-0.199297	0.130375	1.1491	-1.64592	0.122692	-0.259757	0.305614	0.960379	-0.0730916	-2.07645	-0.266127	-0.514761	-22.9832	0.324699
476.5	-0.157269	0.152692	1.14497	-1.65298	0.183881	-0.230561	0.220231	0.959469	-0.212981	-1.84041	-0.51089	0.904715	-10.3455	3.64779
477	-0.0273285	0.164419	1.14083	-1.65959	0.220797	-0.199296	0.133011	0.910188	-0.282482	-1.00582	-0.414984	1.09267	-0.646773	7.30988
477.5	0.144629	0.166581	1.13669	-1.66562	0.280952	-0.166248	0.0447207	0.811631	-0.270241	0.123336	0.0954911	-0.308422	0.82281	12.9946
478	0.320739	0.1609	1.13253	-1.67133	0.316741	-0.131722	-0.044034	0.665212	-0.182157	1.14982	0.702502	-1.33576	6.01801	17.2408
478.5	0.443719	0.149575	1.12837	-1.67645	0.37567	-0.0960244	-0.131742	0.475707	-0.0421163	1.73684	0.894911	-0.457602	22.0756	21.469
479	0.438417	0.134996	1.1242	-1.68118	0.410076	-0.0594853	-0.216508	0.251002	0.116135	1.72577	0.40371	1.12461	31.9833	22.4719
479.5	0.285034	0.119544	1.12002	-1.68538	0.467558	-0.0224324	-0.295724	0.00225973	0.258226	1.18088	-0.480808	1.13669	16.8128	22.7794
480	0.0729785	0.105501	1.11584	-1.68901	0.500428	0.0147921	-0.366488	-0.256433	0.35468	0.34572	-1.07754	-0.471223	-15.2924	21.0058
480.5	-0.057498	0.0949989	1.11164	-1.69232	0.556253	0.0518564	-0.425321	-0.50785	0.387534	-0.458855	-0.863361	-1.40875	-32.4917	21.0989
481	-0.0478702	0.089982	1.10744	-1.6949	0.587412	0.0884146	-0.468859	-0.734807	0.349381	-0.96992	0.0293722	-0.361114	-20.6758	21.435
481.5	0.0274936	0.0921847	1.10323	-1.69721	0.64143	0.124137	-0.495931	-0.925197	0.236916	-1.08689	0.862169	1.12737	-1.09971	24.1192
482	0.0701119	0.10316	1.09902	-1.69895	0.670657	0.158689	-0.506172	-1.0693	0.059278	-0.86073	0.979368	0.993605	-1.74529	25.9508
482.5	0.0724678	0.124306	1.0948	-1.70012	0.722687	0.191749	-0.499369	-1.15734	-0.153699	-0.42763	0.387599	-0.447498	-19.8882	29.1599
483	0.0958605	0.156801	1.09057	-1.70079	0.749836	0.223009	-0.475876	-1.18266	-0.365935	0.0431664	-0.369672	-1.17329	-31.6164	31.5124
483.5	0.174837	0.201376	1.08633	-1.70099	0.799702	0.252161	-0.436376	-1.14359	-0.547029	0.401274	-0.75431	-0.323571	-23.6639	35.565
484	0.280708	0.258022	1.08209	-1.70073	0.824621	0.278931	-0.381917	-1.04207	-0.67005	0.563063	-0.615811	0.844546	-8.17332	38.6117
484.5	0.367	0.325773	1.07784	-1.69999	0.872203	0.303045	-0.314006	-0.883477	-0.714239	0.519482	-0.172079	0.839598	-1.71623	42.7686
485	0.424583	0.402695	1.07358	-1.69861	0.894769	0.324263	-0.234628	-0.676156	-0.668269	0.318272	0.272146	-0.183876	-5.78508	45.4941
485.5	0.476523	0.486039	1.06932	-1.69673	0.939915	0.34236	-0.146606	-0.431916	-0.533381	0.0314792	0.522355	-0.894532	-7.97737	49.3932
486	0.540219	0.572484	1.06504	-1.69443	0.96	0.357147	-0.0531947	-0.164903	-0.323003	-0.264335	0.511726	-0.500484	-1.06432	52.1505
486.5	0.609523	0.658396	1.06077	-1.6917	1.00261	0.368443	0.0423548	0.109901	-0.0594395	-0.496373	0.249802	0.471348	10.5771	56.2255
487	0.669445	0.74008	1.05648	-1.68843	1.02009	0.376112	0.136556	0.376951	0.227429	-0.606503	-0.176384	0.883797	16.0611	59.0846
487.5	0.723605	0.814022	1.05219	-1.68463	1.06008	0.380042	0.225722	0.620955	0.502787	-0.56015	-0.553866	0.234901	12.7802	63.1955
488	0.801728	0.877069	1.04789	-1.6803	1.07488	0.380155	0.306359	0.828378	0.732123	-0.352461	-0.608504	-0.761384	9.67132	66.224
488.5	0.929382	0.926576	1.04358	-1.67547	1.11212	0.376397	0.375029	0.987978	0.885854	-0.018097	-0.236313	-0.884623	19.6646	70.6236
489	1.08537	0.960562	1.03927	-1.67023	1.12415	0.368754	0.428533	1.09099	0.942422	0.365629	0.329642	0.145798	41.6495	73.5219
489.5	1.19855	0.977882	1.03495	-1.66431	1.15858	0.357243	0.464085	1.13206	0.892476	0.694806	0.661348	1.11472	58.4596	76.6307
490	1.20364	0.978352	1.03062	-1.65796	1.16779	0.341911	0.479837	1.11039	0.740324	0.87193	0.500929	0.676374	52.6214	76.9036
490.5	1.10454	0.96273	1.02629	-1.65125	1.19937	0.322843	0.475682	1.02951	0.500934	0.837057	-0.00733154	-0.768617	29.6449	76.8213
491	0.978953	0.932593	1.02195	-1.64389	1.2057	0.300149	0.453556	0.899474	0.203178	0.602419	-0.432123	-1.26376	13.4666	74.5741
491.5	0.887347	0.89019	1.0176	-1.63618	1.2344	0.273982	0.4158	0.732404	-0.117815	0.231832	-0.474946	0.00121803	16.783	73.201
492	0.813692	0.838314	1.01324	-1.62793	1.23783	0.244516	0.364778	0.540662	-0.425669	-0.182559	-0.19511	1.34214	23.119	70.3801
492.5	0.712751	0.780131	1.00888	-1.61907	1.26359	0.211947	0.30301	0.337044	-0.684373	-0.540899	0.130018	0.841999	12.5214	68.5618
493	0.589438	0.718936	1.00451	-1.60982	1.2641	0.176514	0.233324	0.134443	-0.863195	-0.761357	0.282188	-0.858911	-9.98205	65.5742
493.5	0.497363	0.657837	1.00013	-1.60018	1.28694	0.138472	0.158619	-0.0556916	-0.941524	-0.804922	0.233092	-1.38707	-19.7213	64.3503
494	0.46687	0.599471	0.995751	-1.58989	1.28453	0.0980978	0.0818094	-0.224072	-0.911185	-0.681083	0.0829151	0.0135636	-8.4957	62.6458
494.5	0.464433	0.545825	0.991363	-1.57922	1.30443	0.0556873	0.00514	-0.365527	-0.779504	-0.445127	-0.0775862	1.3769	4.86551	62.622
495	0.446312	0.498169	0.986964	-1.56805	1.29909	0.0115583	-0.0694037	-0.477807	-0.565789	-0.168674	-0.185789	0.82106	0.83161	61.449
495.5	0.421163	0.457068	0.98256	-1.55639	1.31611	-0.0339626	-0.139535	-0.559625	-0.294405	0.0923666	-0.178737	-0.826675	-11.9829	61.5636
496	0.426042	0.422434	0.97815	-1.5443	1.30789	-0.0805221	-0.203305	-0.612031	0.00407466	0.300707	-0.0588901	-1.29958	-12.078	60.6464
496.5	0.461253	0.393634	0.973732	-1.53176	1.32204	-0.127779	-0.259121	-0.638712	0.29294	0.433969	0.0715855	-0.0320073	5.04886	61.0399
497	0.482483	0.369697	0.969306	-1.51876	1.31095	-0.175361	-0.305407	-0.643982	0.538289	0.486842	0.112859	1.21243	19.8716	59.9416
497.5	0.457182	0.349617	0.96487	-1.5052	1.32225	-0.222917	-0.339957	-0.631416	0.712262	0.468115	0.0736552	0.829348	16.7101	59.6073
498	0.403006	0.332623	0.960427	-1.49127	1.30836	-0.270081	-0.360991	-0.604491	0.797323	0.388466	0.037739	-0.600401	1.6508	57.7081
498.5	0.361658	0.318299	0.955983	-1.47678	1.31687	-0.316486	-0.367499	-0.566272	0.789589	0.25888	0.0445452	-1.21098	-5.72152	56.9745
499	0.345759	0.306544	0.951523	-1.46197	1.30022	-0.361777	-0.358867	-0.51866	0.696786	0.0967298	0.029764	-0.252473	1.21273	55.0651
499.5	0.325285	0.297468	0.94706	-1.44657	1.306	-0.405612	-0.335692	-0.463399	0.536175	-0.0764582	-0.0880466	1.00699	9.80449	54.3148
500	0.27595	0.291351	0.942592	-1.43087	1.28666	-0.447639	-0.299061	-0.401596	0.32992	-0.231689	-0.241434	0.950986	4.57866	52.2258
500.5	0.222146	0.288653	0.938113	-1.41472	1.2898	-0.487542	-0.24927	-0.332943	0.099722	-0.333032	-0.218541	-0.326948	-10.3537	51.5369
501	0.211735	0.289989	0.933623	-1.39811	1.26786	-0.524995	-0.187029	-0.256691	-0.132571	-0.352161	0.0772814	-1.17695	-17.4974	50.1691
501.5	0.254745	0.296011	0.929129	-1.38115	1.26843	-0.559716	-0.114904	-0.172741	-0.344619	-0.283247	0.418035	-0.504531	-7.4531	50.6044
502	0.305084	0.307254	0.92463	-1.36357	1.24395	-0.591421	-0.036302	-0.0820164	-0.517902	-0.151085	0.413837	0.820067	6.60181	49.9822
502.5	0.31599	0.323965	0.920119	-1.34565	1.24203	-0.619848	0.0457127	0.0144886	-0.638837	-0.00231557	-0.0457722	1.07962	6.49548	50.3614
503	0.299553	0.345966	0.915602	-1.32752	1.21511	-0.644774	0.128315	0.115627	-0.699283	0.111653	-0.575953	-0.0705291	-8.31753	49.3449
503.5	0.314548	0.372558	0.911071	-1.30882	1.21078	-0.665975	0.208844	0.219989	-0.696617	0.155409	-0.614557	-1.12669	-17.0657	49.8144
504	0.390763	0.402495	0.906539	-1.28973	1.1815	-0.683267	0.284636	0.325194	-0.632854	0.1201	-0.0230474	-0.69802	-5.08944	49.5149
504.5	0.481452	0.434057	0.902	-1.27029	1.17491	-0.696488	0.353081	0.426942	-0.51667	0.0219038	0.674331	0.639548	17.0926	50.4964
505	0.511894	0.465188	0.897443	-1.25027	1.14341	-0.705498	0.411646	0.519818	-0.35964	-0.0994087	0.770703	1.10728	24.3548	49.6887
505.5	0.470513	0.493649	0.892882	-1.23007	1.1346	-0.710181	0.458931	0.598801	-0.174035	-0.189856	0.119978	0.114031	10.1508	49.4731
506	0.427569	0.517185	0.888317	-1.20949	1.10097	-0.710456	0.494187	0.659106	0.0263014	-0.204781	-0.675454	-0.987099	-6.18402	48.0085
506.5	0.459042	0.533711	0.88374	-1.18855	1.09008	-0.706262	0.516177	0.6961	0.227897	-0.128191	-0.842744	-0.754102	-2.05858	48.4
507	0.562755	0.541519	0.879155	-1.16721	1.05442	-0.697563	0.523732	0.705353	0.415518	0.0191532	-0.216806	0.444942	19.6069	48.1479
507.5	0.656573	0.539463	0.874555	-1.1454	1.04159	-0.684359	0.514651	0.681173	0.570043	0.179829	0.570714	0.984662	35.8746	48.8925
508	0.666436	0.527078	0.869954	-1.12334	1.004	-0.66666	0.487058	0.619477	0.673562	0.293766	0.763293	0.212549	31.3366	47.4021
508.5	0.598364	0.504617	0.86534	-1.10084	0.989346	-0.644521	0.440881	0.521057	0.715748	0.334769	0.254685	-0.751389	16.2508	46.121
509	0.512386	0.473024	0.860717	-1.07819	0.94999	-0.61801	0.377013	0.38964	0.691277	0.302971	-0.392208	-0.667072	8.16126	43.1041
509.5	0.454295	0.433888	0.856087	-1.05505	0.933588	-0.587222	0.297708	0.231218	0.599786	0.215076	-0.561675	0.236864	11.6638	41.2552
510	0.416393	0.389379	0.85145	-1.03172	0.892584	-0.552276	0.205851	0.0538362	0.447811	0.0938594	-0.18561	0.741293	15.1708	38.1394
510.5	0.362229	0.342125	0.8468	-1.00802	0.87463	-0.513318	0.104637	-0.132291	0.249175	-0.0379871	0.268037	0.286402	9.38065	36.001
511	0.278527	0.29498	0.84214	-0.98392	0.832113	-0.470523	-0.00211355	-0.314738	0.0256066	-0.156854	0.344537	-0.445876	-3.29628	32.3549
511.5	0.188143	0.25073	0.837466	-0.959559	0.812691	-0.424078	-0.111099	-0.48146	-0.19599	-0.247378	0.0404891	-0.570369	-12.9929	29.9223
512	0.126526	0.211869	0.832794	-0.934911	0.768804	-0.374193	-0.219042	-0.621158	-0.388505	-0.299771	-0.256728	-0.0210819	-15.1379	26.642
512.5	0.107357	0.180486	0.828103	-0.91003	0.748086	-0.32111	-0.321256	-0.723097	-0.53164	-0.304546	-0.210694	0.514055	-12.3213	25.2375
513	0.110478	0.158229	0.823402	-0.884792	0.702943	-0.265083	-0.413311	-0.779105	-0.611773	-0.25819	0.11003	0.401927	-11.7395	23.2317
513.5	0.10737	0.146237	0.818693	-0.859236	0.681046	-0.206378	-0.492515	-0.785798	-0.623935	-0.172455	0.325152	-0.220654	-15.3608	22.8698
514	0.0993924	0.145013	0.813976	-0.833478	0.634828	-0.145297	-0.556465	-0.742761	-0.571989	-0.0631622	0.181083	-0.542865	-18.2613	21.6024
514.5	0.11035	0.154361	0.809244	-0.807385	0.611945	-0.0821515	-0.602899	-0.652441	-0.466978	0.0529606	-0.189801	-0.127778	-14.5528	21.9652
515	0.150318	0.173426	0.804504	-0.781174	0.564783	-0.0172614	-0.630345	-0.521239	-0.32669	0.154453	-0.430738	0.439513	-7.44195	21.5493
515.5	0.207408	0.200849	0.799756	-0.754534	0.54102	0.0490382	-0.638496	-0.359141	-0.172509	0.219588	-0.309396	0.356778	-2.67896	22.7294
516	0.269594	0.234926	0.794996	-0.727905	0.493077	0.116384	-0.627722	-0.178562	-0.0260411	0.235605	0.0891818	-0.225033	-0.560178	22.8839
516.5	0.334084	0.273736	0.790221	-0.700973	0.468589	0.184416	-0.598471	0.00705067	0.0937459	0.205397	0.454957	-0.423757	4.81176	24.2943
517	0.389917	0.315244	0.785439	-0.673666	0.420038	0.252758	-0.551674	0.184024	0.174524	0.1442	0.499635	0.0239872	12.5926	24.3095
517.5	0.414905	0.357404	0.780645	-0.646289	0.395019	0.32103	-0.489122	0.339129	0.21319	0.0705167	0.162747	0.376423	15.2329	25.2271
518	0.408285	0.398239	0.775837	-0.618728	0.345978	0.388839	-0.412648	0.461647	0.215517	0.00379687	-0.332627	0.10907	9.36683	24.6685
518.5	0.404347	0.435911	0.771019	-0.590938	0.320571	0.455799	-0.324023	0.544005	0.193968	-0.0436867	-0.624095	-0.290715	4.11903	25.3833
519	0.436845	0.468798	0.766197	-0.562942	0.271233	0.521503	-0.225463	0.581566	0.164505	-0.0743404	-0.469114	-0.179464	7.9368	25.1255
519.5	0.497823	0.495592	0.761352	-0.534792	0.245637	0.58557	-0.119796	0.572585	0.142472	-0.101996	0.0568093	0.211972	18.1982	26.2335
520	0.545782	0.515387	0.756501	-0.506421	0.196169	0.647596	-0.0101177	0.518644	0.139155	-0.138607	0.580911	0.218919	24.0275	25.8978
520.5	0.550754	0.527717	0.751638	-0.477992	0.170505	0.707185	0.100167	0.424634	0.158747	-0.182902	0.688979	-0.15444	21.8652	26.3106
521	0.521974	0.532533	0.746763	-0.449366	0.121107	0.763958	0.208381	0.29927	0.197702	-0.213393	0.260842	-0.263986	16.7128	25.074
521.5	0.489824	0.530171	0.741878	-0.420489	0.0955809	0.817542	0.312203	0.154037	0.247975	-0.199815	-0.389998	0.0850768	14.4399	24.9468
522	0.477874	0.521326	0.736979	-0.39153	0.0463527	0.867564	0.409155	0.00177599	0.29654	-0.121671	-0.737829	0.327924	14.3526	23.7877
522.5	0.492606	0.507025	0.732065	-0.362622	0.0211411	0.913679	0.496472	-0.144852	0.325409	0.0144682	-0.489114	0.0455896	15.5224	24.162
523	0.525479	0.488566	0.727142	-0.333347	-0.0276692	0.955542	0.571824	-0.273865	0.315413	0.173039	0.145399	-0.358303	18.9517	23.4225
523.5	0.552574	0.467391	0.722207	-0.30411	-0.0524096	0.992835	0.633613	-0.374584	0.25069	0.302439	0.619908	-0.249148	25.4144	23.618
524	0.541585	0.444939	0.717258	-0.274801	-0.100652	1.02526	0.680608	-0.438306	0.124338	0.357912	0.543401	0.269832	29.0485	21.9236
524.5	0.476586	0.422537	0.712297	-0.245316	-0.124729	1.05253	0.712165	-0.459071	-0.0590375	0.320736	0.0297685	0.451232	23.9057	20.7531
525	0.383317	0.401322	0.707321	-0.215794	-0.172219	1.0744	0.727668	-0.433909	-0.280605	0.208141	-0.422302	-0.022267	11.7043	18.007
525.5	0.315745	0.382135	0.70233	-0.186207	-0.195483	1.09064	0.727353	-0.362714	-0.507846	0.0678497	-0.413461	-0.520908	4.01552	16.6514
526	0.301267	0.365344	0.697334	-0.156477	-0.242044	1.10104	0.711478	-0.249111	-0.700963	-0.0522342	-0.0343128	-0.315538	7.59175	14.4455
526.5	0.307263	0.350647	0.692317	-0.126741	-0.264288	1.10545	0.679399	-0.102109	-0.823547	-0.137761	0.249237	0.350695	16.2266	13.583
527	0.285778	0.33698	0.687292	-0.0969573	-0.309774	1.10372	0.630848	0.0664962	-0.845488	-0.200698	0.149309	0.571702	17.5645	11.2934
527.5	0.234386	0.322596	0.682247	-0.0671592	-0.33084	1.09575	0.566892	0.244219	-0.747036	-0.260066	-0.130967	0.0164649	10.6951	10.0697
528	0.195476	0.305267	0.677196	-0.0373013	-0.37504	1.08147	0.489001	0.417185	-0.52605	-0.329074	-0.187074	-0.594777	6.15537	7.72752
528.5	0.199645	0.282525	0.672128	-0.00755525	-0.394768	1.06085	0.399651	0.570892	-0.204013	-0.398265	0.0849441	-0.415179	13.6868	6.84064
529	0.223139	0.251906	0.667042	0.0223201	-0.437552	1.03388	0.302259	0.691752	0.177817	-0.426783	0.353568	0.351879	27.3618	4.73331
529.5	0.216813	0.211213	0.661951	0.0522124	-0.455753	1.00061	0.199881	0.767824	0.566704	-0.359472	0.240462	0.662431	33.3685	3.52925
530	0.173609	0.158802	0.656835	0.0819661	-0.496968	0.961116	0.0956533	0.790162	0.906347	-0.156166	-0.205126	0.0628781	26.967	0.74543
530.5	0.141083	0.0938588	0.651715	0.111903	-0.513525	0.915518	-0.0074788	0.753653	1.14714	0.174899	-0.512408	-0.641333	20.8009	-0.867002
531	0.154712	0.0166196	0.646574	0.141591	-0.553011	0.863972	-0.106947	0.657149	1.25157	0.560115	-0.309036	-0.468845	26.8313	-3.65166
531.5	0.175172	-0.0715408	0.641418	0.171488	-0.567744	0.806667	-0.201122	0.503285	1.19851	0.874307	0.228191	0.34937	40.0437	-5.62148
532	0.117722	-0.168171	0.63625	0.201039	-0.605365	0.743836	-0.28906	0.298895	0.987714	0.987049	0.536941	0.673236	41.7053	-10.0293
532.5	-0.0568882	-0.26996	0.631071	0.230764	-0.618185	0.675748	-0.368925	0.0558004	0.639141	0.824861	0.283711	0.0715634	24.2555	-14.7639
533	-0.299547	-0.373029	0.625873	0.260338	-0.653801	0.602704	-0.438338	-0.209129	0.193669	0.41474	-0.251765	-0.580609	-0.363177	-21.7677
533.5	-0.527468	-0.473215	0.620663	0.289878	-0.664555	0.525033	-0.495168	-0.476023	-0.291118	-0.120946	-0.470823	-0.398599	-14.8166	-27.5762
534	-0.698997	-0.566311	0.615435	0.319316	-0.698064	0.443119	-0.537613	-0.72393	-0.750377	-0.609836	-0.118253	0.289086	-17.7112	-33.8586
534.5	-0.827522	-0.648317	0.610192	0.348634	-0.706669	0.357352	-0.565136	-0.934279	-1.12288	-0.90531	0.400542	0.485692	-20.3187	-37.9568
535	-0.930651	-0.715756	0.604935	0.377886	-0.737969	0.268154	-0.577786	-1.09099	-1.3587	-0.93728	0.460493	0.0080361	-29.8322	-42.4017
535.5	-0.996104	-0.766051	0.599665	0.406965	-0.744325	0.175983	-0.575758	-1.1805	-1.42461	-0.731801	-0.0755084	-0.368066	-39.1796	-44.6781
536	-1.00067	-0.797858	0.594374	0.435974	-0.773317	0.0813105	-0.559536	-1.19333	-1.30977	-0.39646	-0.672248	-0.168865	-39.6187	-47.0661
536.5	-0.946115	-0.811264	0.589076	0.464848	-0.777322	-0.015375	-0.530788	-1.12732	-1.03048	-0.0800904	-0.670641	0.147236	-30.3086	-47.161
537	-0.854113	-0.807804	0.583751	0.493503	-0.803952	-0.113556	-0.491512	-0.985414	-0.623848	0.107333	0.0430964	0.135988	-16.5461	-47.7726
537.5	-0.756835	-0.790331	0.57842	0.522254	-0.805587	-0.212705	-0.444556	-0.7758	-0.140127	0.139669	0.860268	-0.00659841	-2.84763	-47.0058
538	-0.68936	-0.762735	0.57307	0.550505	-0.829795	-0.312295	-0.393015	-0.511577	0.360373	0.0769976	0.993534	0.00605343	5.13852	-47.7973
538.5	-0.667461	-0.729566	0.567704	0.578855	-0.828983	-0.411776	-0.339061	-0.208705	0.812841	0.0317339	0.237059	0.0325836	4.7225	-47.7283
539	-0.664299	-0.695541	0.562325	0.606941	-0.85075	-0.510602	-0.284598	0.114511	1.15911	0.103391	-0.809233	-0.113317	-0.222257	-48.8218
539.5	-0.622149	-0.665015	0.556925	0.634815	-0.847465	-0.608221	-0.230792	0.439014	1.35675	0.32407	-1.24329	-0.175876	2.05935	-48.0857
540	-0.514791	-0.641502	0.551513	0.662617	-0.866764	-0.704084	-0.178722	0.745155	1.38152	0.631051	-0.665746	0.0865764	16.4311	-47.9767
540.5	-0.393753	-0.627371	0.546081	0.690096	-0.861021	-0.797637	-0.130066	1.01241	1.22792	0.884183	0.455859	0.315315	33.4314	-46.8319
541	-0.349617	-0.623781	0.540634	0.717366	-0.877834	-0.888356	-0.086169	1.22244	0.913163	0.936043	1.21359	0.0734777	37.6435	-48.1545
541.5	-0.428765	-0.630794	0.535169	0.744423	-0.869624	-0.975713	-0.0474786	1.36212	0.478982	0.708418	1.03568	-0.341548	26.3043	-49.9859
542	-0.600242	-0.647582	0.52969	0.771341	-0.884019	-1.05919	-0.0139827	1.42282	-0.0166998	0.223176	0.100436	-0.287945	7.8563	-54.4557
542.5	-0.784593	-0.672644	0.524197	0.798022	-0.873377	-1.13828	0.0157073	1.40264	-0.502987	-0.390548	-0.829844	0.235605	-7.58866	-58.1485
543	-0.918959	-0.704015	0.518682	0.824311	-0.885351	-1.21253	0.0433249	1.30437	-0.910987	-0.953047	-1.07335	0.472769	-18.7181	-62.5593
543.5	-0.984388	-0.739468	0.513155	0.850491	-0.872321	-1.28147	0.0695063	1.13363	-1.18548	-1.30396	-0.550846	0.0071279	-26.2017	-64.6786
544	-0.987457	-0.776715	0.507608	0.876363	-0.88193	-1.34468	0.0947982	0.899523	-1.29107	-1.34484	0.25388	-0.531234	-27.6159	-66.8275
544.5	-0.94686	-0.813574	0.502048	0.902	-0.866585	-1.40177	0.119846	0.614122	-1.21721	-1.06272	0.741529	-0.339046	-20.0778	-66.7196
545	-0.891144	-0.848069	0.49647	0.92725	-0.873898	-1.45235	0.144824	0.291689	-0.978925	-0.528247	0.65338	0.364517	-9.55285	-67.1494
545.5	-0.84672	-0.878441	0.490868	0.95241	-0.856291	-1.4961	0.169541	-0.0519724	-0.614508	0.127211	0.185342	0.596869	-4.96628	-66.0013
546	-0.818202	-0.903115	0.485255	0.977085	-0.861418	-1.53271	0.193803	-0.399581	-0.178017	0.745713	-0.259345	-0.00708899	-8.36308	-65.9636
546.5	-0.791025	-0.920724	0.479627	1.00167	-0.841656	-1.56194	0.217614	-0.732493	0.270465	1.17723	-0.418333	-0.639434	-10.4725	-64.7375
547	-0.763634	-0.93022	0.473982	1.02579	-0.844669	-1.58354	0.241019	-1.03234	0.671149	1.30613	-0.326172	-0.410048	-4.78698	-65.0325
547.5	-0.76517	-0.930994	0.468314	1.04961	-0.822859	-1.59733	0.263765	-1.28275	0.971124	1.07803	-0.168453	0.403824	3.63278	-64.7153
548	-0.824069	-0.922868	0.462634	1.0733	-0.82388	-1.60317	0.285732	-1.46913	1.13336	0.531933	-0.0309789	0.700435	2.60246	-66.3385
548.5	-0.922848	-0.905918	0.456934	1.09659	-0.800153	-1.60094	0.307082	-1.57898	1.14196	-0.187968	0.141049	0.0432048	-9.81226	-67.0688
549	-0.999558	-0.880202	0.451215	1.11939	-0.799323	-1.5906	0.327975	-1.60329	1.00176	-0.859267	0.356119	-0.706205	-23.0223	-68.6325
549.5	-1.00261	-0.845566	0.445481	1.14193	-0.773788	-1.57212	0.348164	-1.53799	0.735245	-1.24561	0.451367	-0.514997	-25.2232	-67.8823
550	-0.933773	-0.801594	0.439734	1.16404	-0.771224	-1.54552	0.366887	-1.38443	0.379236	-1.17875	0.239685	0.402429	-18.8792	-66.9309
550.5	-0.830883	-0.747697	0.433962	1.18584	-0.744027	-1.51087	0.383646	-1.14969	-0.0243236	-0.636711	-0.23126	0.800344	-14.9308	-63.3405
551	-0.712952	-0.683321	0.428176	1.20741	-0.739888	-1.46827	0.397939	-0.84635	-0.430898	0.222139	-0.625174	0.082493	-17.7242	-59.8172
551.5	-0.563831	-0.608251	0.422376	1.2286	-0.711195	-1.41788	0.409614	-0.491346	-0.797081	1.09444	-0.590711	-0.782482	-16.3566	-54.3461
552	-0.386122	-0.522977	0.41655	1.24933	-0.705629	-1.35989	0.418156	-0.105306	-1.08366	1.62679	-0.118862	-0.566951	-2.29464	-50.1697
552.5	-0.242699	-0.428999	0.410708	1.26962	-0.675586	-1.29453	0.422003	0.288233	-1.25793	1.5483	0.412958	0.449467	15.7324	-45.8551
553	-0.206334	-0.328964	0.404857	1.28966	-0.668758	-1.22207	0.419731	0.665831	-1.29577	0.802957	0.608648	0.851013	18.561	-44.4904
553.5	-0.275839	-0.226547	0.398983	1.30912	-0.637536	-1.14282	0.410986	1.00636	-1.18429	-0.395096	0.410467	0.0702396	2.46419	-43.234
554	-0.365555	-0.126098	0.393093	1.32823	-0.629606	-1.05713	0.395351	1.29029	-0.926927	-1.62782	0.0577694	-0.819987	-15.9674	-43.2694
554.5	-0.369747	-0.0321639	0.38718	1.347	-0.597399	-0.965373	0.372768	1.50325	-0.540395	-2.40726	-0.191103	-0.542445	-16.3378	-40.6498
555	-0.25492	0.05102	0.381254	1.36542	-0.588535	-0.86797	0.342397	1.63245	-0.0622307	-2.39061	-0.33401	0.484297	-0.375279	-37.1211
555.5	-0.0539767	0.119953	0.375309	1.38334	-0.555453	-0.765367	0.303234	1.6682	0.449724	-1.52636	-0.479703	0.793108	16.4603	-30.4984
556	0.193069	0.172164	0.369346	1.40084	-0.545831	-0.658031	0.254154	1.6053	0.927955	-0.0838801	-0.540436	-0.0201296	27.0929	-24.0946
556.5	0.458227	0.206388	0.363368	1.4179	-0.512097	-0.546474	0.193914	1.44444	1.30783	1.4439	-0.240966	-0.765977	41.0584	-16.5545
557	0.686078	0.22267	0.357366	1.43456	-0.501902	-0.431216	0.121627	1.19213	1.53444	2.52149	0.471638	-0.419153	62.8098	-11.6642
557.5	0.781558	0.222415	0.351355	1.45082	-0.467647	-0.312809	0.0374428	0.861374	1.57084	2.77785	1.14003	0.477212	78.8646	-8.31157
558	0.668146	0.208339	0.34532	1.46651	-0.456999	-0.191829	-0.057858	0.471058	1.40545	2.14311	1.06994	0.662382	68.5708	-9.68098
558.5	0.375068	0.184308	0.339269	1.48171	-0.422428	-0.0688591	-0.161921	0.0479597	1.06301	0.884011	0.0724722	-0.0263309	32.089	-12.6095
559	0.0366381	0.155015	0.333199	1.49678	-0.411513	0.0554912	-0.270746	-0.375345	0.5961	-0.514132	-1.18358	-0.563169	-8.36913	-17.5041
559.5	-0.203543	0.125606	0.327113	1.51105	-0.376757	0.180617	-0.380394	-0.767441	0.069919	-1.56527	-1.6619	-0.325555	-29.8863	-19.6669
560	-0.272802	0.101329	0.321011	1.52506	-0.36573	0.305879	-0.486628	-1.09925	-0.445965	-1.95931	-0.847754	0.240962	-28.1172	-20.2142
560.5	-0.198994	0.0872484	0.314889	1.53844	-0.330916	0.43065	-0.585526	-1.34857	-0.891576	-1.67278	0.694237	0.389391	-14.6175	-16.8666
561	-0.0689622	0.0879504	0.308748	1.55155	-0.319951	0.554287	-0.673712	-1.50018	-1.21931	-0.935595	1.74422	0.065689	-4.24257	-13.2937
561.5	0.0345612	0.107144	0.302595	1.5641	-0.285262	0.676155	-0.74842	-1.54597	-1.39905	-0.106196	1.4435	-0.230166	-3.28714	-8.35877
562	0.0826513	0.147192	0.296418	1.57619	-0.274455	0.795609	-0.807984	-1.48632	-1.42009	0.485642	0.0192283	-0.21709	-10.3285	-5.17882
562.5	0.119282	0.208732	0.29023	1.58766	-0.240018	0.912013	-0.850189	-1.32609	-1.28469	0.684278	-1.36827	0.0131186	-15.8196	-1.0035
563	0.206363	0.290527	0.284019	1.59869	-0.229538	1.02475	-0.873027	-1.07685	-1.01314	0.527953	-1.6403	0.183076	-12.1437	2.38264
563.5	0.361771	0.389599	0.277796	1.60934	-0.195436	1.1332	-0.875665	-0.757885	-0.644372	0.187142	-0.680654	0.119479	1.72943	7.78265
564	0.551272	0.501553	0.271549	1.61939	-0.185389	1.23677	-0.857752	-0.393266	-0.227393	-0.126314	0.678153	-0.0665096	19.4924	12.5869
564.5	0.723152	0.621038	0.265289	1.62898	-0.15181	1.33488	-0.81997	-0.0105865	0.186905	-0.261176	1.39535	-0.148053	34.1981	18.8032
565	0.852895	0.742297	0.259013	1.63803	-0.142291	1.42697	-0.763184	0.362441	0.552176	-0.175944	1.03778	-0.033635	41.6136	23.6148
565.5	0.949728	0.859747	0.252719	1.64674	-0.10928	1.51252	-0.687867	0.699404	0.82717	0.0605713	0.0035806	0.10594	43.115	29.339
566	1.03809	0.968469	0.246403	1.65465	-0.100396	1.59102	-0.594356	0.977289	0.983916	0.321269	-0.888254	0.0798339	42.7138	33.5292
566.5	1.13446	1.06454	0.24007	1.66229	-0.0680476	1.66201	-0.483918	1.17777	1.01584	0.487157	-1.0381	-0.0534007	46.0167	38.6177
567	1.23454	1.14516	0.233726	1.66933	-0.0598796	1.72505	-0.35827	1.28815	0.933894	0.496464	-0.453478	-0.0780358	53.9695	41.9541
567.5	1.31278	1.20872	0.227367	1.67592	-0.0282971	1.77975	-0.22042	1.30093	0.762486	0.353907	0.338509	0.0174528	62.076	45.6593
568	1.34213	1.25472	0.220983	1.68196	-0.0208971	1.82578	-0.0738876	1.21558	0.535882	0.11941	0.758202	0.051243	63.1425	47.069
568.5	1.31893	1.28381	0.214588	1.68755	0.00989667	1.86281	0.0777497	1.04001	0.294136	-0.120687	0.599251	-0.0115024	56.538	48.7954
569	1.26545	1.2976	0.208173	1.69253	0.0164402	1.8906	0.230762	0.788327	0.0734534	-0.302594	0.086002	-0.0338752	46.4982	48.7854
569.5	1.2165	1.29859	0.201742	1.69696	0.0463863	1.90893	0.381638	0.480013	-0.0995609	-0.403573	-0.36289	0.0425032	38.9215	49.9166
570	1.19587	1.28986	0.195297	1.70089	0.0520928	1.91766	0.526984	0.13868	-0.21148	-0.433618	-0.465368	0.0770345	34.9817	49.948
570.5	1.20115	1.27483	0.188837	1.7043	0.0811371	1.91667	0.663276	-0.21023	-0.26427	-0.416257	-0.252119	-0.0469241	33.6442	51.3016
571	1.21353	1.25694	0.182355	1.70734	0.085941	1.90591	0.787091	-0.541057	-0.273188	-0.36432	0.0341976	-0.170878	33.5339	51.3962
571.5	1.219	1.23938	0.175865	1.70967	0.1141	1.8854	0.895328	-0.829272	-0.261622	-0.267701	0.185749	-0.049986	35.5753	52.6362
572	1.21838	1.22489	0.16935	1.71152	0.118043	1.85519	0.985441	-1.05281	-0.253819	-0.103349	0.183772	0.220855	38.3419	52.6245
572.5	1.21797	1.21566	0.162827	1.71294	0.145319	1.81539	1.0558	-1.19462	-0.271905	0.133071	0.12485	0.226532	39.102	53.8506
573	1.22553	1.21319	0.156282	1.71362	0.148348	1.76617	1.10558	-1.24235	-0.325519	0.414532	0.0771401	-0.123569	36.9025	53.8458
573.5	1.2406	1.21809	0.149723	1.71402	0.174744	1.70777	1.13386	-1.19074	-0.408988	0.669379	-0.00152304	-0.384212	35.6403	54.936
574	1.25494	1.22978	0.143152	1.71384	0.176932	1.64044	1.14004	-1.04179	-0.502467	0.799226	-0.154074	-0.129078	37.8623	54.4618
574.5	1.25682	1.24633	0.136563	1.7129	0.202506	1.56452	1.12395	-0.804432	-0.576076	0.717436	-0.286776	0.380805	41.714	54.7054
575	1.23772	1.26463	0.129957	1.71178	0.20385	1.48039	1.08553	-0.494631	-0.596306	0.390458	-0.218265	0.423589	41.1635	53.159
575.5	1.20312	1.28069	0.123338	1.70982	0.228645	1.38846	1.02513	-0.133481	-0.53233	-0.126865	0.106194	-0.154994	36.3391	52.4249
576	1.16833	1.29012	0.116707	1.70749	0.229232	1.28921	0.943649	0.253962	-0.365809	-0.69292	0.454928	-0.596559	33.3989	50.3135
576.5	1.14184	1.28857	0.110058	1.7046	0.253267	1.18315	0.842397	0.639319	-0.0990657	-1.12168	0.454732	-0.232029	37.3476	49.5206
577	1.12484	1.27207	0.103391	1.70132	0.253179	1.07082	0.723196	0.993837	0.2444	-1.24036	-0.0106032	0.523832	43.6301	47.7924
577.5	1.12565	1.23736	0.0967155	1.69738	0.276547	0.952811	0.5882	1.29046	0.622395	-0.958447	-0.584891	0.616095	45.9726	47.7667
578	1.16572	1.18224	0.0900213	1.69298	0.275806	0.829727	0.43966	1.505	0.97797	-0.319836	-0.706803	-0.185924	45.986	47.0377
578.5	1.25357	1.10577	0.0833179	1.68802	0.298595	0.702213	0.279788	1.61804	1.24912	0.494454	-0.159137	-0.813734	54.4068	47.7031
579	1.34273	1.00838	0.0765966	1.68262	0.2973	0.570935	0.111197	1.6172	1.38076	1.22002	0.640911	-0.310431	72.8712	46.3593
579.5	1.33203	0.891813	0.0698655	1.67661	0.319588	0.436578	-0.0629137	1.49857	1.33567	1.59855	0.954149	0.702818	85.2949	44.2115
580	1.13901	0.759052	0.0631151	1.67014	0.317827	0.299837	-0.239304	1.26639	1.1018	1.46759	0.397598	0.756102	71.0109	37.9974
580.5	0.797369	0.614148	0.0563548	1.66303	0.339693	0.161422	-0.412934	0.937464	0.704789	0.852161	-0.575922	-0.271633	34.5442	30.6778
581	0.431747	0.46203	0.0495826	1.65552	0.337583	0.0220564	-0.578384	0.53667	0.199144	-0.0517625	-1.08226	-0.939511	1.48633	21.2888
581.5	0.148086	0.308258	0.042792	1.64749	0.359119	-0.11755	-0.730018	0.0946044	-0.341117	-0.942441	-0.62686	-0.274198	-8.88178	13.8105
582	-0.0479001	0.158739	0.0359964	1.63915	0.356746	-0.256676	-0.86286	-0.356051	-0.836395	-1.51923	0.406576	0.786919	-6.05821	6.54031
582.5	-0.212964	0.0194214	0.0291841	1.62993	0.378068	-0.394619	-0.973606	-0.783798	-1.21608	-1.59097	1.08421	0.7136	-11.2408	1.94518
583	-0.36656	-0.104073	0.0223593	1.62047	0.375506	-0.530674	-1.05963	-1.15971	-1.4291	-1.14285	0.79355	-0.397884	-29.0796	-2.52582
583.5	-0.456378	-0.206865	0.015522	1.61033	0.396698	-0.664164	-1.11781	-1.45761	-1.45099	-0.33777	-0.181818	-0.920365	-41.0798	-4.28338
584	-0.435869	-0.285248	0.00867538	1.59998	0.394055	-0.794424	-1.14613	-1.65779	-1.28705	0.529447	-0.961116	-0.100249	-34.146	-5.8075
584.5	-0.341475	-0.33705	0.00181318	1.5889	0.415198	-0.920812	-1.14456	-1.7499	-0.974078	1.1297	-0.902309	0.834254	-17.2179	-5.25598
585	-0.259969	-0.361854	-0.00505523	1.57751	0.41256	-1.04271	-1.11448	-1.73127	-0.568846	1.2396	-0.118658	0.540554	-8.10792	-5.98688
585.5	-0.246369	-0.361035	-0.0119392	1.56552	0.433781	-1.15953	-1.05781	-1.606	-0.135296	0.838812	0.687444	-0.511134	-9.56146	-6.11763
586	-0.289307	-0.337608	-0.0188315	1.55311	0.431226	-1.27071	-0.977198	-1.38487	0.264147	0.118537	0.860953	-0.800823	-12.2445	-8.00357
586.5	-0.33728	-0.295851	-0.0257373	1.54011	0.452554	-1.37572	-0.875487	-1.08403	0.577935	-0.592585	0.343558	0.0500064	-9.89392	-8.49114
587	-0.340634	-0.240742	-0.032653	1.52667	0.450163	-1.47407	-0.755935	-0.724093	0.772849	-0.96716	-0.351524	0.79913	-7.56626	-9.16646
587.5	-0.267404	-0.17734	-0.039571	1.51279	0.47168	-1.56532	-0.622036	-0.328643	0.837605	-0.822	-0.645084	0.40533	-7.9525	-6.9865
588	-0.108873	-0.110325	-0.0465084	1.49856	0.469512	-1.64902	-0.477651	0.07695	0.782642	-0.205373	-0.389326	-0.538019	-4.78233	-4.46986
588.5	0.0999518	-0.0438199	-0.0534514	1.48378	0.491301	-1.72481	-0.32713	0.465602	0.630356	0.604084	0.0615932	-0.719158	9.12176	-0.041056
589	0.282868	0.018547	-0.0604037	1.46848	0.489408	-1.79233	-0.174293	0.812285	0.414936	1.22085	0.28299	0.0917697	27.5369	2.54034
589.5	0.359345	0.0735617	-0.0673674	1.45274	0.511458	-1.85129	-0.0226358	1.09661	0.180667	1.32235	0.191864	0.770458	35.8485	4.68484
590	0.297938	0.118464	-0.0743362	1.43677	0.509884	-1.90143	0.124689	1.30351	-0.0275704	0.792525	0.0297161	0.389692	25.8345	3.68001
590.5	0.144767	0.151091	-0.0813174	1.42013	0.532266	-1.94251	0.265106	1.42492	-0.1685	-0.208194	0.0416666	-0.516291	7.67275	2.64122
591	-0.0169868	0.170028	-0.0883054	1.40314	0.531021	-1.97437	0.396083	1.45839	-0.217802	-1.30363	0.168653	-0.719876	-3.46694	0.219035
591.5	-0.118621	0.174689	-0.0953031	1.38572	0.553734	-1.99685	0.516082	1.40792	-0.170948	-2.03889	0.159845	0.0705657	-2.08115	-0.058294
592	-0.137001	0.165397	-0.102303	1.36792	0.55282	-2.00985	0.623118	1.28164	-0.0462597	-2.07436	-0.11729	0.778637	2.54073	0.00726656
592.5	-0.0765625	0.143439	-0.109316	1.34972	0.575881	-2.01332	0.714734	1.09027	0.116276	-1.33504	-0.4764	0.405094	3.17899	3.01375
593	0.0576427	0.11106	-0.116331	1.33101	0.575287	-2.00723	0.788476	0.847	0.266804	-0.0461688	-0.540657	-0.55931	5.38875	6.15384
593.5	0.242074	0.0712923	-0.123354	1.3118	0.598666	-1.99161	0.84231	0.566902	0.355208	1.3467	-0.133481	-0.76601	20.0714	10.9495
594	0.403724	0.0276529	-0.130386	1.29243	0.598393	-1.96651	0.874865	0.266775	0.34381	2.34692	0.48903	0.111722	42.2705	13.5144
594.5	0.436985	-0.01622	-0.13742	1.27258	0.622016	-1.93204	0.884722	-0.0365684	0.217677	2.59034	0.81217	0.850952	51.4443	14.9061
595	0.284613	-0.0569049	-0.144462	1.25221	0.621998	-1.88835	0.871545	-0.326001	-0.0132043	1.98764	0.52491	0.402168	32.8846	12.195
595.5	0.00205829	-0.0914643	-0.151508	1.23174	0.645851	-1.83559	0.837672	-0.581725	-0.309671	0.770813	-0.152016	-0.585259	-1.29696	8.81656
596	-0.284091	-0.117615	-0.158562	1.21072	0.646008	-1.77401	0.786975	-0.784875	-0.612548	-0.614495	-0.689499	-0.726855	-27.1714	4.17918
596.5	-0.471748	-0.133793	-0.165619	1.18925	0.670039	-1.70385	0.723494	-0.922274	-0.860111	-1.70075	-0.732508	0.121976	-33.8036	2.38477
597	-0.527372	-0.139117	-0.172678	1.1675	0.670294	-1.62543	0.651448	-0.986398	-0.997381	-2.16253	-0.316604	0.748696	-30.2308	1.81066
597.5	-0.469893	-0.133297	-0.179743	1.14549	0.694357	-1.53905	0.573671	-0.977521	-0.988378	-1.92822	0.223916	0.304432	-26.7106	4.86728
598	-0.329819	-0.116546	-0.186813	1.12312	0.694647	-1.44511	0.492612	-0.902201	-0.822582	-1.17219	0.568983	-0.523808	-21.7335	8.53394
598.5	-0.147639	-0.0895275	-0.193884	1.10029	0.718659	-1.34402	0.41008	-0.773152	-0.520606	-0.225331	0.575544	-0.579622	-8.32041	14.3713
599	0.0235083	-0.0533409	-0.200972	1.0772	0.718832	-1.23621	0.327474	-0.606985	-0.126667	0.573077	0.289161	0.150845	9.65752	18.9348
599.5	0.137313	-0.00951269	-0.20807	1.05383	0.742707	-1.12216	0.245831	-0.422596	0.29953	1.00135	-0.144068	0.614381	20.6073	23.8871
600	0.188224	0.040041	-0.21518	1.03015	0.742613	-1.0024	0.165934	-0.238826	0.69269	1.01802	-0.528645	0.218403	18.8275	26.5201
600.5	0.217165	0.0931242	-0.222301	1.00608	0.766185	-0.877464	0.0889123	-0.0714052	0.99503	0.747573	-0.63979	-0.412459	13.8036	29.6672
601	0.266917	0.147459	-0.229432	0.981826	0.765709	-0.747923	0.0156196	0.0671174	1.16343	0.388784	-0.351049	-0.430004	16.2407	31.4363
601.5	0.337398	0.200984	-0.236573	0.957122	0.788804	-0.614386	-0.0538345	0.166971	1.17272	0.107329	0.209623	0.0877306	25.855	34.5314
602	0.394492	0.252208	-0.243724	0.932128	0.787808	-0.477469	-0.119314	0.22305	1.02171	-0.0225065	0.68867	0.409543	31.999	36.344
602.5	0.409695	0.300502	-0.250885	0.906931	0.810306	-0.337834	-0.180464	0.235833	0.735601	-0.0240584	0.729178	0.18816	28.1277	39.0405
603	0.383841	0.346201	-0.258052	0.881571	0.808598	-0.196153	-0.236732	0.210626	0.359078	0.0153881	0.239508	-0.212753	16.1108	40.0111
603.5	0.345037	0.390439	-0.265224	0.855923	0.830303	-0.0531112	-0.287455	0.156954	-0.0508074	0.00595323	-0.473272	-0.298604	4.20659	41.863
604	0.328249	0.434806	-0.2724	0.829751	0.827729	0.0905814	-0.332038	0.0872704	-0.433569	-0.0930918	-0.882506	-0.031317	-2.0959	42.5126
604.5	0.354443	0.480993	-0.279582	0.80364	0.848482	0.234204	-0.36996	0.0155304	-0.734605	-0.254244	-0.639237	0.235186	-1.40585	44.8095
605	0.419082	0.530509	-0.286772	0.777154	0.844851	0.377029	-0.401219	-0.0449943	-0.914603	-0.403997	0.110659	0.201111	2.5922	46.4607
605.5	0.497935	0.5845	-0.293959	0.750406	0.864477	0.518327	-0.426132	-0.0835216	-0.956908	-0.466328	0.790963	-0.0758606	6.21464	49.8209
606	0.569604	0.643608	-0.301156	0.723646	0.859626	0.657347	-0.445125	-0.0921719	-0.867663	-0.39906	0.851225	-0.255393	7.31276	52.2328
606.5	0.634331	0.70789	-0.308347	0.696522	0.877928	0.793371	-0.458822	-0.0664554	-0.67209	-0.21281	0.234592	-0.10269	7.81198	56.0703
607	0.711733	0.77681	-0.315546	0.669231	0.87171	0.925653	-0.467755	-0.00572167	-0.40996	0.0341354	-0.556451	0.201216	9.46512	58.9297
607.5	0.820956	0.849329	-0.322741	0.641672	0.8885	1.05348	-0.472326	0.0866794	-0.128426	0.261952	-0.873229	0.244896	13.8046	63.3004
608	0.961045	0.924028	-0.329937	0.614014	0.880714	1.17615	-0.473194	0.203445	0.126528	0.402171	-0.470753	-0.0640974	20.6504	66.5633
608.5	1.10412	0.999211	-0.337129	0.586098	0.895874	1.29296	-0.47151	0.333091	0.315898	0.418302	0.27745	-0.321687	29.8935	70.7518
609	1.2117	1.07299	-0.344319	0.558102	0.886345	1.40325	-0.468169	0.462285	0.416018	0.321026	0.730773	-0.134876	38.3044	72.9664
609.5	1.26094	1.14339	-0.351513	0.529853	0.899698	1.5064	-0.463238	0.57821	0.423907	0.162336	0.552431	0.289193	41.2728	75.4926
610	1.26074	1.20846	-0.358696	0.501495	0.88826	1.60179	-0.45655	0.66867	0.355385	0.00400382	-0.04112	0.342385	35.0563	76.0672
610.5	1.24965	1.26638	-0.365879	0.473032	0.899659	1.68886	-0.446783	0.723172	0.237237	-0.108377	-0.514755	-0.106809	24.7936	77.5962
611	1.26755	1.31563	-0.373049	0.444539	0.886211	1.76707	-0.432202	0.733659	0.103959	-0.158675	-0.498698	-0.454736	20.1807	78.0027
611.5	1.32147	1.35505	-0.380225	0.415736	0.895492	1.83595	-0.410906	0.695122	-0.00860081	-0.157576	-0.0801793	-0.178938	26.2587	79.773
612	1.37937	1.38391	-0.387385	0.386899	0.879884	1.89505	-0.381268	0.605792	-0.0705035	-0.131087	0.329679	0.382974	35.1004	80.1364
612.5	1.40145	1.40201	-0.394544	0.357997	0.886967	1.94401	-0.342779	0.466329	-0.0645614	-0.109822	0.381256	0.437109	35.6196	81.1833
613	1.38447	1.40973	-0.40169	0.328836	0.869092	1.98249	-0.295231	0.28146	0.0111116	-0.106897	0.0923779	-0.125917	26.3564	80.4352
613.5	1.36387	1.40806	-0.408832	0.299696	0.873844	2.01023	-0.237871	0.0611664	0.144217	-0.107773	-0.215081	-0.535378	18.8422	80.6986
614	1.37011	1.39851	-0.415959	0.270482	0.853609	2.02702	-0.170405	-0.181461	0.307961	-0.089749	-0.268267	-0.217906	21.1533	79.8162
614.5	1.39615	1.38296	-0.423079	0.24126	0.855978	2.03272	-0.094048	-0.432448	0.4638	-0.0421903	-0.0829666	0.401398	29.2042	80.1814
615	1.41391	1.36347	-0.430191	0.211955	0.833294	2.02726	-0.0102936	-0.675991	0.571045	0.0349952	0.136459	0.496171	31.947	79.08
615.5	1.4063	1.3422	-0.437284	0.182559	0.833196	2.01062	0.079642	-0.894964	0.5952	0.130576	0.215987	-0.06777	26.4776	78.8077
616	1.37851	1.32116	-0.444371	0.153163	0.808064	1.98287	0.17441	-1.07282	0.514261	0.221149	0.120582	-0.567467	18.8984	76.9249
616.5	1.34585	1.30219	-0.451447	0.123703	0.805447	1.94412	0.2728	-1.19444	0.324174	0.279429	-0.0635988	-0.337652	17.0254	75.99
617	1.31451	1.28674	-0.4585	0.0942614	0.777807	1.89459	0.373369	-1.24744	0.0415547	0.282627	-0.209043	0.360961	19.1019	73.609
617.5	1.27882	1.2758	-0.465548	0.0647559	0.772675	1.83453	0.474321	-1.22323	-0.29784	0.220434	-0.212522	0.627468	17.9504	72.2512
618	1.2352	1.2698	-0.472575	0.0352403	0.742505	1.76427	0.573485	-1.11814	-0.644622	0.0975515	-0.0508936	0.0587267	9.85551	69.5327
618.5	1.19339	1.2685	-0.479592	0.00589275	0.734906	1.68421	0.66777	-0.93422	-0.942636	-0.0662359	0.177611	-0.653199	1.94509	68.0583
619	1.16996	1.27086	-0.486588	-0.0236227	0.702243	1.59482	0.753988	-0.678983	-1.13879	-0.235867	0.297038	-0.525188	2.59046	65.5162
619.5	1.16726	1.27498	-0.493568	-0.0531117	0.692146	1.4966	0.829445	-0.36518	-1.19303	-0.369085	0.183494	0.364102	10.9181	64.3978
620	1.16902	1.27815	-0.50053	-0.0823103	0.657038	1.39013	0.891702	-0.0105407	-1.08577	-0.429789	-0.106659	0.83066	15.5394	62.195
620.5	1.16477	1.27699	-0.507476	-0.11159	0.644531	1.27606	0.938504	0.362839	-0.823521	-0.402656	-0.345971	0.149065	11.7978	61.3565
621	1.1716	1.26766	-0.514401	-0.140928	0.607057	1.15505	0.967731	0.730322	-0.436223	-0.295219	-0.308191	-0.818256	9.46944	59.5021
621.5	1.21145	1.24612	-0.521308	-0.170245	0.592208	1.02784	0.978417	1.06721	0.0276705	-0.13206	0.014323	-0.688819	21.9523	59.0191
622	1.26393	1.20841	-0.528191	-0.199361	0.552423	0.895202	0.969917	1.34971	0.506689	0.0502925	0.348876	0.451078	43.9664	56.9853
622.5	1.26811	1.15104	-0.535061	-0.228457	0.535353	0.757931	0.940763	1.55526	0.933462	0.208838	0.36699	1.01596	55.5104	55.1456
623	1.18968	1.07131	-0.5419	-0.257457	0.493397	0.616876	0.889695	1.66584	1.24781	0.315862	0.0351029	0.14349	46.0872	50.676
623.5	1.06707	0.967698	-0.548721	-0.286214	0.474197	0.472898	0.816923	1.6727	1.41161	0.381049	-0.307089	-0.960334	31.2702	46.3357
624	0.958325	0.840025	-0.555523	-0.314992	0.430197	0.326881	0.7234	1.5745	1.40832	0.425024	-0.321096	-0.714814	29.8189	40.1163
624.5	0.860693	0.689555	-0.562294	-0.343632	0.409046	0.179718	0.609751	1.37477	1.2401	0.446688	-0.035126	0.536027	38.5504	34.4546
625	0.71582	0.519004	-0.569047	-0.372133	0.363154	0.0323242	0.477478	1.08442	0.931052	0.429057	0.239373	1.02567	36.4135	26.5575
625.5	0.485057	0.332431	-0.575776	-0.400512	0.340205	-0.114395	0.330385	0.723096	0.52338	0.352717	0.261247	0.0877009	15.2805	18.8029
626	0.193901	0.134994	-0.582475	-0.428666	0.292615	-0.259541	0.173312	0.315623	0.0688973	0.196537	0.0573356	-0.947133	-11.1349	9.10275
626.5	-0.0978504	-0.0674161	-0.589152	-0.456667	0.268004	-0.40222	0.0116746	-0.110083	-0.375696	-0.044037	-0.146205	-0.639475	-24.8386	0.488031
627	-0.360156	-0.268602	-0.595802	-0.484546	0.218883	-0.541551	-0.14855	-0.524511	-0.757768	-0.338812	-0.169681	0.553058	-27.8928	-9.0812
627.5	-0.607779	-0.462482	-0.602427	-0.512311	0.192869	-0.676691	-0.302078	-0.899878	-1.03779	-0.626716	-0.0526468	0.930371	-35.8729	-16.981
628	-0.846504	-0.643476	-0.609015	-0.539937	0.142395	-0.806818	-0.444118	-1.2117	-1.19129	-0.825322	0.0494982	-0.0177914	-54.541	-25.4175
628.5	-1.04035	-0.806872	-0.615585	-0.567319	0.115171	-0.931144	-0.571258	-1.4405	-1.20767	-0.8558	0.0542617	-0.909233	-69.2908	-31.4731
629	-1.15041	-0.949121	-0.622125	-0.594324	0.0635868	-1.04892	-0.680791	-1.57349	-1.09458	-0.679819	0.00541262	-0.486007	-67.1106	-37.2537
629.5	-1.18622	-1.06803	-0.628631	-0.621288	0.035356	-1.15947	-0.770904	-1.60576	-0.876515	-0.325559	-0.0212551	0.59284	-53.8118	-40.4005
630	-1.1953	-1.1628	-0.635111	-0.648017	-0.0171081	-1.26212	-0.840763	-1.54008	-0.589354	0.117581	-0.0125668	0.766998	-46.6054	-43.8353
630.5	-1.20537	-1.23395	-0.64156	-0.674423	-0.0461393	-1.3563	-0.889927	-1.38481	-0.273791	0.532865	-0.000865989	-0.134807	-48.6975	-45.5327
631	-1.20932	-1.28317	-0.647979	-0.70078	-0.099283	-1.44147	-0.918692	-1.1542	0.0305894	0.806644	-0.0125851	-0.774509	-49.1226	-48.2166
631.5	-1.19921	-1.31319	-0.654364	-0.726724	-0.128839	-1.51716	-0.928203	-0.866835	0.291898	0.867349	-0.0301234	-0.29153	-39.8454	-49.6246
632	-1.19416	-1.32749	-0.660715	-0.752513	-0.182396	-1.583	-0.919465	-0.543469	0.488655	0.709835	-0.0172857	0.544393	-29.1596	-52.4149
632.5	-1.22056	-1.32998	-0.667039	-0.777971	-0.212282	-1.63863	-0.893512	-0.20571	0.610053	0.391445	0.0262579	0.551142	-28.1625	-54.2232
633	-1.27391	-1.32461	-0.673328	-0.803164	-0.266046	-1.6838	-0.851662	0.125178	0.65705	0.0102333	0.0606881	-0.191739	-36.1659	-57.3493
633.5	-1.32027	-1.31506	-0.679578	-0.828227	-0.295982	-1.71833	-0.795233	0.429786	0.641331	-0.327084	0.0517826	-0.587449	-41.0898	-59.0047
634	-1.33702	-1.30451	-0.6858	-0.852738	-0.349694	-1.74211	-0.725751	0.691292	0.579362	-0.540918	-0.00251964	-0.147789	-37.7667	-61.425
634.5	-1.33245	-1.29542	-0.691986	-0.87716	-0.379474	-1.75509	-0.644829	0.896298	0.486968	-0.598279	-0.0699819	0.426027	-32.0751	-62.1636
635	-1.32426	-1.28951	-0.698133	-0.901251	-0.432914	-1.75733	-0.554357	1.03506	0.37687	-0.515234	-0.106947	0.348891	-32.0535	-63.8145
635.5	-1.3116	-1.28765	-0.704252	-0.924997	-0.462301	-1.74892	-0.456509	1.10236	0.258701	-0.338545	-0.076586	-0.16982	-35.2087	-64.0119
636	-1.28396	-1.28996	-0.710329	-0.948424	-0.515202	-1.73006	-0.35371	1.09763	0.138671	-0.123768	0.0209314	-0.370058	-34.9432	-65.2782
636.5	-1.24889	-1.29591	-0.716372	-0.971565	-0.543945	-1.70099	-0.248704	1.02436	0.0186452	0.0792841	0.123401	-0.0613864	-29.9728	-65.3112
637	-1.2304	-1.30448	-0.722373	-0.994239	-0.596095	-1.66204	-0.143918	0.890208	-0.101737	0.237751	0.148636	0.247512	-26.963	-66.7604
637.5	-1.24236	-1.31418	-0.728338	-1.01676	-0.623984	-1.6136	-0.0414343	0.706651	-0.222091	0.335765	0.0656221	0.17395	-29.6422	-67.255
638	-1.27613	-1.32328	-0.734272	-1.03893	-0.675164	-1.55611	0.0566549	0.487738	-0.339741	0.364837	-0.0771153	-0.0827167	-35.9482	-69.1832
638.5	-1.31322	-1.32995	-0.740161	-1.06055	-0.701972	-1.49008	0.147921	0.249186	-0.446419	0.320277	-0.179139	-0.158517	-40.5945	-69.9454
639	-1.34324	-1.33245	-0.746009	-1.08205	-0.751933	-1.41607	0.230312	0.00763862	-0.530793	0.204175	-0.162431	-0.0283799	-42.7555	-71.8825
639.5	-1.36585	-1.32936	-0.751822	-1.10305	-0.777423	-1.3347	0.302814	-0.220496	-0.582437	0.031365	-0.0339592	0.0765974	-43.9311	-72.4678
640	-1.38079	-1.31968	-0.757591	-1.12376	-0.825984	-1.24661	0.364687	-0.420556	-0.591451	-0.165199	0.119661	0.0458689	-46.0093	-74.0828
640.5	-1.38305	-1.30289	-0.763323	-1.14404	-0.849984	-1.1525	0.415499	-0.58048	-0.54985	-0.335873	0.201159	-0.0158985	-47.753	-74.1454
641	-1.36768	-1.27904	-0.76901	-1.16394	-0.896936	-1.05311	0.455036	-0.691389	-0.453527	-0.425755	0.164232	-0.0124128	-48.4681	-74.9567
641.5	-1.33373	-1.24872	-0.774661	-1.18346	-0.919183	-0.949177	0.483401	-0.748146	-0.304721	-0.39585	0.0265414	0.00798432	-47.5727	-73.9489
642	-1.28102	-1.21297	-0.780263	-1.20254	-0.964318	-0.841484	0.500784	-0.749673	-0.113041	-0.242371	-0.146921	-0.0194168	-45.5924	-73.561
642.5	-1.20821	-1.17324	-0.785832	-1.22122	-0.984696	-0.730829	0.507385	-0.699134	0.103961	-0.00498441	-0.266448	-0.0473233	-41.2912	-71.4327
643	-1.11765	-1.13126	-0.79135	-1.23952	-1.02783	-0.618013	0.503493	-0.603421	0.323205	0.243164	-0.242097	0.00120782	-34.5116	-70.2202
643.5	-1.02242	-1.08892	-0.796826	-1.25742	-1.04608	-0.503847	0.489464	-0.472433	0.519525	0.419794	-0.0442336	0.0816826	-26.1038	-67.7619
644	-0.944219	-1.04822	-0.802264	-1.27475	-1.08707	-0.389128	0.465816	-0.318058	0.669022	0.464369	0.235444	0.065659	-19.7096	-66.8432
644.5	-0.90201	-1.01098	-0.807648	-1.29185	-1.10309	-0.274656	0.433316	-0.152859	0.753004	0.361836	0.404336	-0.0686375	-17.4624	-65.2571
645	-0.901326	-0.978738	-0.812997	-1.30846	-1.14172	-0.161214	0.393048	0.0109708	0.760349	0.146593	0.299108	-0.151937	-19.6627	-65.5237
645.5	-0.930623	-0.952655	-0.818294	-1.32464	-1.15531	-0.0495577	0.346361	0.162449	0.689078	-0.11151	-0.0538513	-0.0169908	-23.3227	-65.0136
646	-0.966825	-0.933456	-0.82355	-1.34046	-1.19144	0.0595771	0.294815	0.292557	0.546449	-0.331826	-0.410125	0.211203	-26.928	-65.8559
646.5	-0.985307	-0.921422	-0.828764	-1.35557	-1.20251	0.16549	0.240831	0.395071	0.346645	-0.446926	-0.479933	0.190442	-29.7522	-65.2674
647	-0.972822	-0.916344	-0.833926	-1.37041	-1.236	0.26751	0.18682	0.465657	0.108651	-0.424959	-0.188925	-0.160435	-31.8602	-65.5548
647.5	-0.933443	-0.917526	-0.839047	-1.38472	-1.24434	0.365018	0.135261	0.501861	-0.147425	-0.274092	0.242061	-0.383844	-30.2927	-64.3317
648	-0.888222	-0.923849	-0.84412	-1.39861	-1.27509	0.457426	0.0884526	0.503611	-0.399189	-0.0319448	0.485003	-0.0554407	-24.699	-64.2579
648.5	-0.867077	-0.933896	-0.849139	-1.4121	-1.28061	0.54421	0.0477154	0.472903	-0.622118	0.244925	0.373181	0.463131	-20.179	-63.1186
649	-0.886895	-0.946103	-0.854118	-1.42503	-1.30848	0.624891	0.01375	0.413435	-0.792259	0.487508	0.0156075	0.376457	-24.4824	-63.5201
649.5	-0.932265	-0.958929	-0.859047	-1.43745	-1.31106	0.699043	-0.0128881	0.330396	-0.887944	0.623994	-0.31785	-0.334711	-35.0752	-62.9677
650	-0.969104	-0.971072	-0.863928	-1.44952	-1.33594	0.766312	-0.0318596	0.230393	-0.893152	0.5965	-0.417563	-0.666925	-40.6568	-63.7659
650.5	-0.986036	-0.981685	-0.868756	-1.46105	-1.3355	0.826382	-0.0429646	0.120716	-0.802239	0.377992	-0.263149	-0.00900436	-34.5757	-63.4074
651	-1.01011	-0.990506	-0.873542	-1.47214	-1.3573	0.879015	-0.0463443	0.00803734	-0.621133	-0.00990881	0.0197654	0.770902	-27.0266	-64.4654
651.5	-1.06753	-0.997822	-0.878278	-1.48265	-1.35375	0.924029	-0.0417206	-0.101631	-0.369254	-0.483791	0.279155	0.472909	-30.3498	-64.5184
652	-1.13786	-1.0043	-0.882958	-1.49268	-1.37241	0.961299	-0.0290373	-0.202107	-0.0735605	-0.9025	0.403378	-0.574587	-41.6516	-65.7129
652.5	-1.17173	-1.01081	-0.887593	-1.50213	-1.36568	0.990774	-0.00967641	-0.288611	0.236788	-1.11192	0.31192	-0.87545	-45.0159	-65.1097
653	-1.14466	-1.01824	-0.892179	-1.51131	-1.38111	1.01245	0.0144038	-0.357953	0.528799	-1.00256	0.00168691	0.0845049	-35.0327	-64.8825
653.5	-1.07793	-1.0274	-0.896709	-1.51975	-1.37114	1.02639	0.0412448	-0.408432	0.765774	-0.560376	-0.378501	0.998103	-23.034	-62.6768
654	-1.0033	-1.03887	-0.901194	-1.52776	-1.38335	1.03271	0.0686269	-0.439582	0.91565	0.112423	-0.558629	0.532735	-21.4837	-61.277
654.5	-0.92877	-1.0529	-0.905623	-1.53523	-1.37011	1.03159	0.0936792	-0.451926	0.958696	0.818769	-0.351527	-0.735686	-24.4736	-58.6087
655	-0.855482	-1.0694	-0.910009	-1.54244	-1.37902	1.02325	0.113788	-0.446452	0.887544	1.331	0.140095	-1.03727	-18.1951	-57.6082
655.5	-0.815878	-1.08803	-0.914336	-1.5488	-1.36249	1.00795	0.127534	-0.42382	0.706245	1.47436	0.558929	0.12846	-2.45969	-56.4387
656	-0.866724	-1.10826	-0.918609	-1.55492	-1.3681	0.986022	0.133965	-0.384382	0.434635	1.19109	0.577898	1.18966	2.87264	-58.0704
656.5	-1.0251	-1.12944	-0.922839	-1.56046	-1.34826	0.957822	0.132723	-0.327857	0.108253	0.565533	0.191429	0.62971	-15.7395	-59.9436
657	-1.22692	-1.15078	-0.927009	-1.56543	-1.3506	0.92374	0.124181	-0.25334	-0.22804	-0.202849	-0.283193	-0.849945	-46.1249	-63.6185
657.5	-1.37147	-1.17142	-0.931131	-1.56981	-1.3275	0.884203	0.109493	-0.159176	-0.524687	-0.867245	-0.488938	-1.20686	-60.8166	-65.4128
658	-1.41464	-1.19055	-0.935195	-1.57376	-1.32655	0.83966	0.089862	-0.0453614	-0.739077	-1.23194	-0.348037	0.113056	-51.5735	-67.0632
658.5	-1.40042	-1.20752	-0.93921	-1.57699	-1.30018	0.790586	0.0651446	0.0834118	-0.84692	-1.23112	-0.0859188	1.31206	-37.2915	-66.2667
659	-1.38147	-1.22195	-0.943168	-1.58006	-1.29603	0.737472	0.0354676	0.221318	-0.839181	-0.92032	0.0960678	0.731885	-37.5654	-65.9494
659.5	-1.35541	-1.23379	-0.947075	-1.58229	-1.26646	0.680819	0.00102295	0.360846	-0.721073	-0.442779	0.193918	-0.883392	-46.0647	-63.9634
660	-1.28883	-1.24345	-0.950924	-1.58409	-1.25912	0.621138	-0.0381625	0.493317	-0.512953	0.0326047	0.278844	-1.34014	-42.5948	-62.9592
660.5	-1.19085	-1.25179	-0.954724	-1.58551	-1.22642	0.558933	-0.0820287	0.609066	-0.24921	0.37184	0.302131	0.0292996	-22.2662	-60.8687
661	-1.12561	-1.2601	-0.958465	-1.58625	-1.21598	0.494727	-0.130512	0.698525	0.0300329	0.518138	0.135909	1.40787	-6.06007	-60.6933
661.5	-1.14312	-1.26981	-0.962153	-1.58651	-1.18022	0.429014	-0.183411	0.753066	0.285702	0.495576	-0.214852	0.898896	-12.6489	-60.2315
662	-1.21043	-1.2822	-0.965789	-1.58628	-1.16677	0.362284	-0.239457	0.767411	0.486051	0.38829	-0.500317	-0.844719	-32.993	-61.5441
662.5	-1.24907	-1.29816	-0.969368	-1.5854	-1.12805	0.295028	-0.296881	0.738852	0.609841	0.286699	-0.440472	-1.47858	-39.6832	-61.5067
663	-1.23077	-1.31801	-0.972888	-1.58419	-1.11172	0.227696	-0.353998	0.666442	0.646804	0.238999	-0.0358768	-0.123536	-24.0226	-62.3489
663.5	-1.20996	-1.34136	-0.976356	-1.58223	-1.07016	0.160727	-0.408902	0.55123	0.596629	0.23551	0.396273	1.42496	-6.72324	-62.0247
664	-1.25392	-1.3671	-0.979769	-1.57995	-1.05106	0.0945434	-0.459895	0.397015	0.471876	0.227713	0.522588	1.06707	-12.8986	-63.5248
664.5	-1.35972	-1.39344	-0.983121	-1.57697	-1.00682	0.0295402	-0.504683	0.211066	0.295719	0.164488	0.291228	-0.749946	-38.295	-64.4079
665	-1.46039	-1.41809	-0.986422	-1.57363	-0.985092	-0.0339343	-0.540988	0.00399328	0.0987048	0.0237716	-0.0673265	-1.56346	-56.2439	-66.63
665.5	-1.5111	-1.43857	-0.989665	-1.56974	-0.938311	-0.095537	-0.566681	-0.21179	-0.0882403	-0.177088	-0.304139	-0.243693	-51.8489	-67.2706
666	-1.53672	-1.45246	-0.992852	-1.56526	-0.914091	-0.154969	-0.580221	-0.424083	-0.240525	-0.392694	-0.355116	1.40833	-42.1149	-68.7352
666.5	-1.57566	-1.45748	-0.995983	-1.56024	-0.864917	-0.211961	-0.580451	-0.620879	-0.342499	-0.560684	-0.281212	1.12619	-48.9264	-68.6317
667	-1.60682	-1.45164	-0.999063	-1.55481	-0.838424	-0.266276	-0.566224	-0.790095	-0.387548	-0.61678	-0.114508	-0.690355	-68.2408	-69.1519
667.5	-1.56879	-1.43334	-1.00208	-1.54882	-0.787047	-0.317704	-0.536963	-0.921	-0.377639	-0.520292	0.142362	-1.5461	-74.1528	-67.391
668	-1.44374	-1.40146	-1.00504	-1.54232	-0.758437	-0.366071	-0.492733	-1.00528	-0.323457	-0.271695	0.399634	-0.284057	-56.4945	-65.7121
668.5	-1.29423	-1.35548	-1.00794	-1.53518	-0.705073	-0.411234	-0.434883	-1.03862	-0.244857	0.0755421	0.452095	1.32847	-35.2168	-62.1707
669	-1.19244	-1.29536	-1.01079	-1.5278	-0.674585	-0.453075	-0.365104	-1.01956	-0.16344	0.43115	0.185579	1.08635	-35.1127	-59.8428
669.5	-1.13734	-1.22163	-1.01358	-1.51967	-0.619416	-0.4915	-0.28451	-0.947911	-0.094312	0.696525	-0.234768	-0.605445	-51.1459	-56.4101
670	-1.07561	-1.13538	-1.01631	-1.51121	-0.587255	-0.526453	-0.194509	-0.826291	-0.0469561	0.779604	-0.501436	-1.40339	-58.3421	-54.1372
670.5	-0.981372	-1.03845	-1.01898	-1.50204	-0.530565	-0.557893	-0.0966883	-0.660178	-0.0247771	0.624222	-0.43987	-0.286679	-44.9345	-50.5228
671	-0.889589	-0.933407	-1.0216	-1.49261	-0.496955	-0.585796	0.00699622	-0.457875	-0.0252671	0.237925	-0.146736	1.13633	-28.4558	-48.3026
671.5	-0.839068	-0.823406	-1.02415	-1.48261	-0.438912	-0.610161	0.114361	-0.229613	-0.0395803	-0.288621	0.162887	0.960311	-28.7609	-45.1934
672	-0.812021	-0.71189	-1.02666	-1.47214	-0.403832	-0.630877	0.223021	0.0126924	-0.0556564	-0.793757	0.369929	-0.463418	-42.4069	-43.2951
672.5	-0.748069	-0.602235	-1.0291	-1.4611	-0.344388	-0.648117	0.330777	0.257475	-0.0585274	-1.0826	0.48393	-1.15076	-47.0241	-39.4535
673	-0.62033	-0.497464	-1.03148	-1.44964	-0.308249	-0.661923	0.434937	0.492075	-0.0369004	-1.00851	0.449984	-0.281086	-34.008	-35.7347
673.5	-0.463815	-0.400058	-1.03381	-1.43762	-0.247872	-0.672357	0.532013	0.701937	0.0106603	-0.549519	0.10125	0.838895	-17.5642	-29.9731
674	-0.320112	-0.311907	-1.03608	-1.42539	-0.210909	-0.679472	0.618427	0.873534	0.0789598	0.170405	-0.546024	0.749728	-14.0682	-25.2078
674.5	-0.184908	-0.234388	-1.03829	-1.41239	-0.14982	-0.683337	0.691298	0.996503	0.158954	0.912762	-1.06076	-0.252935	-18.38	-19.3778
675	-0.0335946	-0.168518	-1.04043	-1.39908	-0.112243	-0.683903	0.747775	1.06297	0.236663	1.39627	-0.866357	-0.781414	-14.3975	-15.2228
675.5	0.114591	-0.115041	-1.04253	-1.38517	-0.0506806	-0.681316	0.785516	1.06768	0.294622	1.40473	0.14929	-0.285629	2.5652	-10.79
676	0.18421	-0.0743855	-1.04457	-1.37088	-0.0127705	-0.675642	0.802764	1.00913	0.317323	0.889912	1.31719	0.44224	16.7471	-9.23
676.5	0.112076	-0.0465417	-1.04654	-1.35623	0.0490137	-0.666981	0.799456	0.891679	0.297437	0.019583	1.63639	0.531143	11.5495	-8.38848
677	-0.0812488	-0.0309369	-1.04846	-1.34098	0.0869984	-0.655397	0.776498	0.724151	0.235561	-0.882323	0.652153	0.0305927	-14.212	-10.1217
677.5	-0.278999	-0.0264151	-1.05032	-1.32548	0.148746	-0.64098	0.735934	0.520553	0.144199	-1.45448	-0.979677	-0.379501	-42.8099	-10.4515
678	-0.348394	-0.0313026	-1.05212	-1.30936	0.186564	-0.623806	0.680298	0.297003	0.0404256	-1.45954	-1.9596	-0.320346	-55.2049	-10.2443
678.5	-0.24255	-0.0435225	-1.05386	-1.29294	0.248	-0.603958	0.611197	0.0683023	-0.0613607	-0.900716	-1.4633	0.00230614	-44.4633	-6.46747
679	-0.0324757	-0.0607261	-1.05555	-1.27597	0.285375	-0.581515	0.529738	-0.152542	-0.150425	-0.0197434	0.141739	0.256205	-20.2269	-2.40365
679.5	0.14305	-0.0804576	-1.05717	-1.25869	0.346228	-0.556568	0.437742	-0.354423	-0.223342	0.80943	1.60295	0.280043	0.261902	2.68041
680	0.170096	-0.100347	-1.05874	-1.241	0.382918	-0.529188	0.337452	-0.528281	-0.280335	1.24289	1.8228	0.0346669	1.83191	4.78813
680.5	0.0388521	-0.118294	-1.06024	-1.22288	0.442933	-0.499471	0.231382	-0.665827	-0.314494	1.12358	0.740244	-0.296894	-15.2168	6.00818
681	-0.162427	-0.132569	-1.0617	-1.20423	0.478687	-0.467509	0.122638	-0.760141	-0.319466	0.539776	-0.739035	-0.323418	-37.3439	4.79481
681.5	-0.316646	-0.141853	-1.06309	-1.18544	0.537636	-0.433386	0.0155773	-0.804364	-0.28857	-0.215148	-1.52554	0.102237	-48.6009	5.13496
682	-0.362266	-0.145231	-1.06442	-1.16596	0.572184	-0.397217	-0.0858943	-0.795956	-0.221588	-0.797273	-1.20411	0.459171	-47.0107	5.70887
682.5	-0.310565	-0.142186	-1.06569	-1.14632	0.629849	-0.359103	-0.179622	-0.73891	-0.130031	-0.974278	-0.208643	0.188348	-39.8441	9.2102
683	-0.201156	-0.132545	-1.06691	-1.12628	0.662939	-0.319169	-0.26408	-0.640483	-0.0290692	-0.704391	0.718574	-0.389531	-31.584	12.814
683.5	-0.0748061	-0.116364	-1.06807	-1.1059	0.719031	-0.27754	-0.338313	-0.510435	0.0662301	-0.140658	1.07839	-0.455159	-20.3242	18.3024
684	0.0279179	-0.093802	-1.06917	-1.08504	0.750485	-0.23436	-0.401887	-0.360427	0.142653	0.447845	0.801526	0.121864	-8.8651	22.423
684.5	0.0728076	-0.0650811	-1.07021	-1.06382	0.804817	-0.189779	-0.454945	-0.203492	0.19004	0.799326	0.128418	0.540651	-5.18992	26.9299
685	0.0573189	-0.0305614	-1.07119	-1.04239	0.834365	-0.143968	-0.497339	-0.0515411	0.203904	0.776808	-0.558342	0.214652	-13.3504	29.1222
685.5	0.0221145	0.00912559	-1.07212	-1.02048	0.886693	-0.0971074	-0.527941	0.0873002	0.188906	0.4248	-0.872538	-0.378567	-23.8105	31.8555
686	0.0150512	0.0530124	-1.07299	-0.998283	0.914145	-0.0493846	-0.545913	0.206633	0.154032	-0.0767649	-0.640925	-0.435473	-25.4492	33.3385
686.5	0.0510044	0.0998704	-1.07379	-0.975799	0.964288	-0.00101335	-0.55006	0.301149	0.104299	-0.506902	-0.0396105	0.0681433	-17.093	36.487
687	0.11044	0.148405	-1.07455	-0.953052	0.989424	0.0477904	-0.539511	0.367098	0.0448736	-0.69976	0.518561	0.427876	-8.71246	38.9246
687.5	0.171137	0.197485	-1.07524	-0.929953	1.03719	0.0967898	-0.513871	0.402959	-0.0159064	-0.604573	0.684577	0.219393	-6.98636	42.9788
688	0.22896	0.246327	-1.07587	-0.906407	1.05987	0.145734	-0.473262	0.409097	-0.0695627	-0.293938	0.414812	-0.223682	-10.1321	46.0228
688.5	0.290292	0.294562	-1.07645	-0.882657	1.10503	0.194366	-0.419569	0.386656	-0.107061	0.0781128	-0.044894	-0.360542	-11.2701	50.3293
689	0.358698	0.34219	-1.07697	-0.858595	1.12504	0.242412	-0.355027	0.338687	-0.122557	0.356254	-0.380779	-0.0628494	-7.94383	53.248
689.5	0.424056	0.389425	-1.07743	-0.834415	1.16746	0.289593	-0.282207	0.269185	-0.116738	0.444126	-0.450902	0.285916	-3.05409	57.0123
690	0.472559	0.436535	-1.07784	-0.809818	1.18465	0.335622	-0.204002	0.183064	-0.0952514	0.338358	-0.309992	0.275555	-1.7965	59.0513
690.5	0.505427	0.483732	-1.07819	-0.784975	1.2242	0.380203	-0.123617	0.0867626	-0.062969	0.121451	-0.0627855	-0.056517	-3.56439	61.9561
691	0.537519	0.531146	-1.07848	-0.759893	1.23845	0.423045	-0.0445947	-0.0132413	-0.0265105	-0.0918131	0.207352	-0.311873	-4.57557	63.5389
691.5	0.583012	0.578862	-1.07872	-0.734562	1.27495	0.463849	0.0294971	-0.110331	0.00511815	-0.207573	0.407269	-0.187116	-1.3762	66.4479
692	0.639014	0.626951	-1.0789	-0.709083	1.28609	0.502311	0.0956943	-0.19752	0.0237694	-0.190304	0.410707	0.162112	3.04883	68.2023
692.5	0.687735	0.675458	-1.07902	-0.683377	1.31946	0.538138	0.151931	-0.267785	0.0231733	-0.0714035	0.146377	0.307827	3.85318	71.0713
693	0.717201	0.724333	-1.07908	-0.657273	1.3274	0.571052	0.196462	-0.315249	0.00252231	0.0706693	-0.273398	0.0684427	-0.884569	72.4433
693.5	0.741021	0.773353	-1.07909	-0.631066	1.3575	0.600766	0.228284	-0.334198	-0.0286897	0.158622	-0.547159	-0.236114	-5.11147	74.8247
694	0.777715	0.822065	-1.07905	-0.604614	1.36215	0.627015	0.246277	-0.322276	-0.0581809	0.140374	-0.441903	-0.256461	-3.8666	75.8293
694.5	0.836588	0.869749	-1.07894	-0.578111	1.38892	0.649554	0.251416	-0.277166	-0.0732257	0.0271597	0.00528253	0.0399872	3.5487	77.9555
695	0.897964	0.915403	-1.07878	-0.551315	1.39019	0.66814	0.244936	-0.200183	-0.0639149	-0.130041	0.449679	0.271192	9.999	78.636
695.5	0.936746	0.95776	-1.07857	-0.524219	1.41354	0.682568	0.227909	-0.0953176	-0.0234044	-0.261423	0.537736	0.170057	10.4888	80.2547
696	0.951564	0.995397	-1.0783	-0.497269	1.41138	0.692645	0.201465	0.0309529	0.0498196	-0.308422	0.224469	-0.114136	6.12609	80.4795
696.5	0.96793	1.02691	-1.07797	-0.469951	1.43129	0.698205	0.167315	0.170349	0.150453	-0.24409	-0.204551	-0.253766	3.67284	82.0273
697	1.01188	1.05111	-1.07759	-0.442447	1.42563	0.699116	0.127583	0.31309	0.263896	-0.0822793	-0.416725	-0.11293	6.97344	82.581
697.5	1.08204	1.06717	-1.07716	-0.414808	1.44203	0.695268	0.0840589	0.447118	0.365472	0.124435	-0.317689	0.144788	14.9351	84.4239
698	1.15269	1.07473	-1.07667	-0.387271	1.43291	0.686593	0.0385573	0.560302	0.427085	0.313256	-0.0490536	0.265239	22.1094	84.7339
698.5	1.19352	1.07398	-1.07613	-0.359373	1.44579	0.673043	-0.00732259	0.641534	0.424455	0.433113	0.185512	0.0977327	24.5836	85.6134
699	1.1922	1.0657	-1.07553	-0.331512	1.43313	0.654627	-0.0519361	0.681937	0.3421	0.457549	0.26696	-0.229448	21.4789	84.4305
699.5	1.15822	1.05113	-1.07488	-0.303493	1.44266	0.631733	-0.0932199	0.675642	0.17714	0.384513	0.187805	-0.340299	16.876	83.6811
700	1.10692	1.03178	-1.07417	-0.275387	1.42666	0.604003	-0.129053	0.620332	-0.0567868	0.230689	0.0158905	-0.00965561	13.5252	81.0433
700.5	1.04346	1.00923	-1.07341	-0.247123	1.43269	0.571531	-0.15727	0.517817	-0.328074	0.0260726	-0.132575	0.432054	10.4171	79.1665
701	0.964401	0.984908	-1.0726	-0.218939	1.4132	0.534472	-0.175978	0.373503	-0.59191	-0.193124	-0.156301	0.363487	2.75811	75.7997
701.5	0.874794	0.960004	-1.07173	-0.190636	1.41578	0.492996	-0.18348	0.195452	-0.799196	-0.390847	-0.0581966	-0.268569	-8.58425	73.6211
702	0.798736	0.935419	-1.07082	-0.162265	1.39287	0.447326	-0.178305	-0.00517062	-0.903298	-0.528181	0.0460524	-0.649808	-16.116	70.445
702.5	0.757964	0.911708	-1.06984	-0.133836	1.39206	0.397722	-0.159445	-0.215872	-0.870817	-0.573955	0.0244467	-0.149487	-13.5903	68.9223
703	0.751765	0.889061	-1.06882	-0.105415	1.36575	0.344484	-0.126747	-0.423761	-0.688425	-0.514785	-0.104806	0.664199	-6.58327	66.6547
703.5	0.765716	0.86737	-1.06775	-0.0769554	1.36158	0.287929	-0.0809398	-0.616114	-0.366581	-0.360051	-0.148905	0.645515	-4.22266	66.089
704	0.793287	0.846352	-1.06662	-0.0484857	1.33199	0.228429	-0.0237367	-0.78162	0.0579026	-0.142614	0.0460824	-0.321121	-7.19803	64.7379
704.5	0.838411	0.82569	-1.06544	-0.0200412	1.32542	0.166435	0.0434159	-0.910195	0.524688	0.0942655	0.356484	-0.957942	-4.4291	64.9911
705	0.889372	0.805116	-1.06421	0.00845392	1.29351	0.102501	0.116516	-0.994078	0.959484	0.306308	0.422953	-0.296885	8.5455	63.9996
705.5	0.913863	0.784479	-1.06293	0.0368422	1.28386	0.0370674	0.192747	-1.02743	1.28647	0.463167	0.0331908	0.871538	21.1452	63.7822
706	0.889732	0.763805	-1.0616	0.0653922	1.24893	-0.029393	0.26903	-1.00703	1.44002	0.549616	-0.561418	0.920173	18.3372	61.6879
706.5	0.84086	0.743361	-1.06022	0.0936539	1.23631	-0.0963988	0.343415	-0.931309	1.37429	0.568262	-0.780418	-0.331944	4.15635	60.437
707	0.816488	0.72366	-1.05879	0.122107	1.19843	-0.163468	0.41476	-0.800701	1.07526	0.531959	-0.280301	-1.22127	-1.82011	57.9998
707.5	0.824241	0.705387	-1.05731	0.150441	1.18295	-0.230097	0.482131	-0.619476	0.564619	0.446532	0.602743	-0.468402	10.5413	56.8147
708	0.810615	0.689263	-1.05578	0.178584	1.14228	-0.295784	0.544574	-0.394639	-0.0971227	0.314805	1.08796	1.00832	24.332	53.9155
708.5	0.716955	0.675874	-1.0542	0.206708	1.12406	-0.360031	0.600104	-0.136567	-0.816424	0.136138	0.659762	1.18284	15.4238	51.313
709	0.557808	0.66547	-1.05257	0.234805	1.08073	-0.42234	0.646207	0.14137	-1.48096	-0.0894804	-0.402935	-0.310218	-16.5539	46.825
709.5	0.427851	0.657707	-1.05089	0.262795	1.05991	-0.482229	0.681181	0.426436	-1.97117	-0.340112	-1.19353	-1.47379	-40.8141	43.9372
710	0.405883	0.651396	-1.04917	0.290715	1.01405	-0.53922	0.703647	0.705191	-2.1871	-0.581508	-1.01235	-0.611729	-32.6747	41.0567
710.5	0.462341	0.644403	-1.0474	0.318525	0.990803	-0.592868	0.711229	0.958279	-2.08004	-0.799496	-0.0406608	1.14517	-4.3646	40.4313
711	0.509927	0.633775	-1.04557	0.34605	0.942584	-0.642727	0.702373	1.16724	-1.65025	-0.959633	0.928809	1.36468	11.5355	38.828
711.5	0.505082	0.616065	-1.04371	0.373589	0.917053	-0.688392	0.676656	1.31661	-0.946919	-1.00109	1.18751	-0.310034	4.81287	38.2332
712	0.482156	0.587731	-1.04179	0.40101	0.866631	-0.72817	0.633615	1.39353	-0.0637811	-0.862581	0.59736	-1.60159	-4.05771	36.3475
712.5	0.494754	0.54553	-1.03983	0.428184	0.838966	-0.76307	0.572348	1.38876	0.876359	-0.511072	-0.397592	-0.703721	6.89334	35.9285
713	0.547034	0.486929	-1.03782	0.455214	0.786524	-0.792785	0.492386	1.29788	1.73673	0.0304294	-1.12065	1.18496	30.3287	34.4856
713.5	0.599318	0.410538	-1.03577	0.482068	0.756921	-0.817038	0.393954	1.12213	2.38717	0.67094	-1.08144	1.46618	43.4513	34.0136
714	0.619747	0.316475	-1.03367	0.508734	0.702645	-0.835618	0.277856	0.868762	2.72544	1.26443	-0.27096	-0.272944	39.3467	31.4917
714.5	0.597365	0.206549	-1.03152	0.53533	0.671324	-0.848323	0.145484	0.550747	2.69354	1.64659	0.783924	-1.65767	34.8942	28.8642
715	0.510419	0.0841964	-1.02933	0.561745	0.615414	-0.855012	-0.000421155	0.187706	2.28901	1.69598	1.32183	-0.75939	40.2753	23.2092
715.5	0.310853	-0.0457469	-1.0271	0.587789	0.582555	-0.855594	-0.15548	-0.195549	1.56455	1.37637	0.883146	1.20133	39.6202	16.6817
716	-0.0245204	-0.17737	-1.02482	0.613695	0.525203	-0.850011	-0.315108	-0.572662	0.619606	0.742229	-0.271519	1.48992	9.56526	7.12564
716.5	-0.414979	-0.304093	-1.0225	0.639447	0.490995	-0.83825	-0.472918	-0.912375	-0.405497	-0.0478359	-1.20553	-0.241043	-40.155	-1.61484
717	-0.725713	-0.419197	-1.02013	0.664983	0.432396	-0.820362	-0.622616	-1.18596	-1.36041	-0.804962	-1.12309	-1.59496	-74.3512	-10.2811
717.5	-0.886122	-0.51647	-1.01773	0.690231	0.397067	-0.796431	-0.758913	-1.3726	-2.11559	-1.37917	-0.13742	-0.786008	-72.7656	-15.5262
718	-0.935844	-0.590824	-1.01527	0.715041	0.337442	-0.766591	-0.876873	-1.45805	-2.57438	-1.67444	0.84982	1.03484	-54.2847	-19.9945
718.5	-0.959464	-0.638738	-1.01279	0.739788	0.301167	-0.731025	-0.972884	-1.43709	-2.68749	-1.6634	0.974289	1.40917	-50.8027	-21.859
719	-0.977369	-0.658516	-1.01025	0.764225	0.240741	-0.689968	-1.04425	-1.31353	-2.45736	-1.37328	0.227395	-0.104125	-67.604	-23.7015
719.5	-0.926755	-0.650387	-1.00767	0.788476	0.203755	-0.643682	-1.089	-1.09898	-1.93257	-0.863607	-0.57268	-1.42223	-76.3818	-22.5752
720	-0.754153	-0.616494	-1.00506	0.812235	0.142679	-0.592491	-1.10592	-0.81198	-1.19949	-0.216118	-0.652092	-0.809219	-54.3745	-20.6726
720.5	-0.501491	-0.56073	-1.0024	0.835847	0.105212	-0.536752	-1.09515	-0.478392	-0.371824	0.458696	-0.0771951	0.827797	-13.3416	-16.2797
721	-0.272035	-0.488397	-0.999703	0.859142	0.0437543	-0.476848	-1.05794	-0.127633	0.431608	1.03628	0.415268	1.29432	14.1825	-13.2481
721.5	-0.12863	-0.405723	-0.996962	0.882219	0.00596036	-0.413217	-0.996359	0.211143	1.10741	1.40034	0.280076	0.057113	15.3772	-10.1509
722	-0.0488522	-0.319289	-0.994185	0.904798	-0.0556602	-0.346315	-0.913168	0.511084	1.58069	1.46676	-0.253203	-1.17903	7.21774	-9.57795
722.5	0.0217598	-0.235416	-0.99137	0.927116	-0.0935272	-0.276625	-0.810664	0.751527	1.81548	1.22182	-0.470375	-0.799714	12.7367	-8.63692
723	0.0854208	-0.159557	-0.988512	0.949267	-0.155149	-0.204665	-0.691364	0.917752	1.81424	0.727757	-0.0394026	0.598832	29.2876	-9.56189
723.5	0.0901116	-0.0957826	-0.985623	0.970866	-0.192873	-0.130957	-0.558179	1.00017	1.6103	0.106995	0.57707	1.11093	35.087	-10.1082
724	0.00757509	-0.0464722	-0.982693	0.992193	-0.254232	-0.0560493	-0.414615	0.995611	1.26024	-0.484026	0.652153	0.12075	18.2933	-12.8025
724.5	-0.107547	-0.0122737	-0.979719	1.01321	-0.291632	0.0195002	-0.262635	0.91063	0.83622	-0.883894	0.0513836	-0.927151	-5.1409	-14.5532
725	-0.170904	0.00772639	-0.97672	1.03386	-0.352537	0.0951317	-0.104106	0.757759	0.405818	-0.997251	-0.645935	-0.647839	-14.3182	-16.8876
725.5	-0.150802	0.0157441	-0.973675	1.05414	-0.389368	0.170279	0.0579967	0.552511	0.0185136	-0.835158	-0.771357	0.44086	-6.7526	-16.9081
726	-0.0833936	0.0149862	-0.9706	1.07393	-0.449646	0.244375	0.219991	0.312864	-0.29617	-0.499144	-0.226525	0.810659	2.19736	-17.373
726.5	-0.0231246	0.00925411	-0.967485	1.09348	-0.485687	0.316874	0.378065	0.0586425	-0.528849	-0.130674	0.456595	0.0708055	2.61764	-16.5208
727	0.00415931	0.00245935	-0.964341	1.11268	-0.545079	0.387222	0.528457	-0.18983	-0.686862	0.148841	0.675847	-0.652999	-1.86061	-17.3455
727.5	0.00432345	-0.001863	-0.961156	1.13139	-0.580176	0.454895	0.667554	-0.413067	-0.78724	0.282802	0.328783	-0.409091	-2.85306	-17.4835
728	-0.00609771	-0.000914543	-0.957937	1.14968	-0.638497	0.519387	0.792196	-0.593534	-0.84855	0.291288	-0.16948	0.332602	-1.2284	-19.1322
728.5	-0.0110409	0.00717482	-0.954686	1.16766	-0.672401	0.580213	0.899932	-0.716549	-0.883108	0.246219	-0.364377	0.509126	-1.87972	-19.4831
729	0.00130931	0.0232502	-0.951402	1.18508	-0.729445	0.636908	0.9887	-0.771912	-0.894139	0.21851	-0.207534	-0.0209473	-5.46185	-20.7867
729.5	0.0322641	0.0470369	-0.948083	1.20205	-0.761967	0.68906	1.05665	-0.754987	-0.875429	0.231985	-0.00964171	-0.424205	-5.94571	-20.6114
730	0.0700425	0.0770556	-0.944736	1.21878	-0.817535	0.736266	1.10247	-0.666369	-0.812488	0.253715	-0.0175748	-0.177158	-1.24634	-21.5841
730.5	0.0974761	0.110644	-0.941356	1.23508	-0.848497	0.778192	1.12601	-0.512283	-0.691972	0.214915	-0.141725	0.25533	4.73698	-21.432
731	0.110731	0.144162	-0.937938	1.25078	-0.902357	0.814517	1.1275	-0.304282	-0.503775	0.0588903	-0.095462	0.236618	7.44493	-22.6803
731.5	0.122446	0.173358	-0.934492	1.26618	-0.931565	0.844981	1.10751	-0.0578868	-0.241955	-0.208193	0.22903	-0.104313	9.69292	-22.8231
732	0.136746	0.193789	-0.931017	1.28105	-0.983577	0.869359	1.06709	0.207698	0.0860091	-0.505801	0.555783	-0.21097	14.3562	-24.2897
732.5	0.138873	0.201208	-0.927513	1.29553	-1.0108	0.887483	1.00729	0.470804	0.455741	-0.705341	0.466772	0.0132508	19.5321	-24.6618
733	0.12069	0.191907	-0.923978	1.3096	-1.06077	0.899238	0.929338	0.709207	0.82888	-0.684693	-0.128418	0.160561	20.3897	-26.3255
733.5	0.106927	0.163032	-0.920416	1.32309	-1.08588	0.90454	0.834814	0.90272	1.15951	-0.387222	-0.797188	0.0360792	19.7005	-26.5773
734	0.131346	0.112849	-0.916816	1.33612	-1.1336	0.903375	0.724939	1.03296	1.39901	0.127017	-0.929162	-0.122907	24.2093	-27.7562
734.5	0.192347	0.0409575	-0.913194	1.34874	-1.1564	0.895768	0.600964	1.08536	1.50443	0.692086	-0.294166	-0.0697981	36.938	-27.7874
735	0.232139	-0.0516027	-0.909544	1.36095	-1.20175	0.8818	0.4642	1.05049	1.44635	1.0949	0.682962	0.0755249	49.4589	-30.0337
735.5	0.175227	-0.162374	-0.905872	1.37252	-1.22207	0.861595	0.316997	0.92692	1.21677	1.17004	1.23434	0.0985313	50.6978	-32.9772
736	-0.0191344	-0.287655	-0.902165	1.38372	-1.26483	0.835337	0.16169	0.72014	0.831997	0.863744	0.863836	-0.0196629	34.7381	-39.4483
736.5	-0.317558	-0.422792	-0.898437	1.39444	-1.28251	0.803238	0.00262797	0.445635	0.334449	0.276719	-0.185797	-0.0725758	8.17794	-46.38
737	-0.635903	-0.562545	-0.894681	1.40465	-1.32258	0.765576	-0.154921	0.126411	-0.213313	-0.381935	-1.11676	0.0031868	-17.8436	-54.9181
737.5	-0.893955	-0.701453	-0.890897	1.41427	-1.33745	0.72264	-0.305483	-0.210911	-0.741532	-0.888255	-1.22549	0.0425212	-34.2058	-61.3236
738	-1.05654	-0.834181	-0.887092	1.42354	-1.37466	0.674789	-0.443911	-0.538702	-1.18373	-1.09174	-0.449779	-0.0288042	-39.0008	-67.3522
738.5	-1.14183	-0.955867	-0.883257	1.43216	-1.38661	0.622393	-0.566333	-0.831099	-1.48652	-0.968736	0.605426	-0.0625986	-35.2517	-70.6171
739	-1.19521	-1.06245	-0.879404	1.44034	-1.42081	0.565865	-0.669805	-1.06518	-1.61508	-0.611665	1.17226	0.0417205	-30.4175	-74.0986
739.5	-1.25503	-1.15092	-0.875523	1.44809	-1.42972	0.505636	-0.752248	-1.22311	-1.56046	-0.178483	0.88504	0.110473	-30.7031	-75.8954
740	-1.32542	-1.21951	-0.871622	1.4552	-1.46081	0.442164	-0.812748	-1.29356	-1.3364	0.179298	0.00529007	-0.0288056	-37.2199	-78.6731
740.5	-1.3752	-1.26776	-0.867693	1.46193	-1.46653	0.375927	-0.851907	-1.27143	-0.969743	0.378314	-0.807217	-0.183863	-42.0221	-79.7802
741	-1.37064	-1.29645	-0.863752	1.46807	-1.49437	0.307416	-0.870716	-1.15857	-0.505133	0.418574	-1.00203	-0.0429753	-37.4348	-81.371
741.5	-1.31287	-1.30755	-0.859782	1.47371	-1.49681	0.237124	-0.870741	-0.964997	-0.00380391	0.353337	-0.514693	0.23286	-24.1379	-80.9839
742	-1.23464	-1.30406	-0.855789	1.47892	-1.52134	0.16557	-0.85432	-0.706932	0.470539	0.254431	0.264187	0.178935	-11.258	-81.3711
742.5	-1.17166	-1.28964	-0.851779	1.4835	-1.52041	0.0932449	-0.824181	-0.405264	0.860296	0.173649	0.7913	-0.215188	-4.14829	-80.4857
743	-1.13761	-1.26826	-0.847752	1.48755	-1.54154	0.0206555	-0.783195	-0.0829689	1.12282	0.128314	0.747068	-0.35237	-1.0142	-81.0421
743.5	-1.12893	-1.24378	-0.8437	1.49105	-1.53716	-0.0517006	-0.73324	0.23698	1.23244	0.105968	0.221717	0.0786907	2.01046	-80.6636
744	-1.13994	-1.21959	-0.839633	1.49406	-1.55481	-0.123342	-0.675918	0.532566	1.18494	0.0797703	-0.386888	0.485375	1.96118	-81.7891
744.5	-1.16	-1.19839	-0.835539	1.49664	-1.54694	-0.193802	-0.612833	0.78484	1.00022	0.0344668	-0.664579	0.194716	-3.42801	-81.8647
745	-1.1717	-1.18214	-0.831435	1.4987	-1.56108	-0.262639	-0.545266	0.978673	0.715389	-0.0251151	-0.479491	-0.461821	-9.74078	-83.2015
745.5	-1.16411	-1.17205	-0.827313	1.50003	-1.54965	-0.329408	-0.474337	1.10348	0.377975	-0.0790478	-0.0371915	-0.518135	-8.33603	-83.2627
746	-1.14906	-1.1686	-0.823171	1.50103	-1.56022	-0.393724	-0.401326	1.1539	0.0398718	-0.105764	0.334617	0.200145	-0.546425	-84.5606
746.5	-1.15382	-1.17159	-0.819012	1.50137	-1.54525	-0.455211	-0.326627	1.1296	-0.255156	-0.0993959	0.439697	0.709362	2.79374	-84.7888
747	-1.18899	-1.1801	-0.814835	1.50142	-1.55225	-0.513518	-0.2507	1.03489	-0.473768	-0.0759388	0.306005	0.234736	-6.0396	-86.4353
747.5	-1.2321	-1.19259	-0.810644	1.50068	-1.53368	-0.568344	-0.174203	0.879291	-0.592492	-0.060367	0.0791449	-0.61246	-18.9307	-86.8696
748	-1.25654	-1.2071	-0.806443	1.4996	-1.53711	-0.619401	-0.0975712	0.67576	-0.606163	-0.0765398	-0.147035	-0.646706	-23.6162	-88.3457
748.5	-1.26215	-1.22144	-0.802218	1.49786	-1.51501	-0.666461	-0.0215732	0.439166	-0.527973	-0.13358	-0.336134	0.224372	-18.4155	-88.3703
749	-1.26706	-1.23345	-0.797988	1.49575	-1.51487	-0.709308	0.0528825	0.18556	-0.386109	-0.214376	-0.40326	0.826173	-14.6554	-89.4302
749.5	-1.27496	-1.24109	-0.79374	1.49293	-1.48923	-0.74778	0.124816	-0.0687597	-0.216575	-0.278772	-0.223212	0.304416	-18.959	-89.0044
750	-1.26594	-1.2425	-0.789476	1.48957	-1.48559	-0.781742	0.193388	-0.308116	-0.056912	-0.279707	0.185774	-0.670223	-25.0304	-89.3647
750.5	-1.22644	-1.23612	-0.7852	1.48589	-1.45648	-0.811102	0.25808	-0.518432	0.0589194	-0.186093	0.540521	-0.767371	-21.8127	-88.0083
751	-1.17586	-1.22075	-0.780913	1.48162	-1.44939	-0.835791	0.318362	-0.688135	0.108572	-3.79679e-05	0.485103	0.18841	-11.722	-87.5953
751.5	-1.14742	-1.19573	-0.776618	1.47687	-1.41684	-0.855795	0.373272	-0.808811	0.0865704	0.239842	-0.024662	0.934746	-7.71426	-85.9405
752	-1.14371	-1.16093	-0.772305	1.47141	-1.40638	-0.871113	0.421707	-0.875649	0.00392345	0.467979	-0.572664	0.434023	-16.9906	-85.5027
752.5	-1.12435	-1.11678	-0.767981	1.46559	-1.37052	-0.881792	0.463648	-0.886183	-0.113659	0.618165	-0.618171	-0.684729	-27.7564	-83.5315
753	-1.0568	-1.0642	-0.763654	1.45916	-1.35679	-0.887899	0.498962	-0.84149	-0.230384	0.636863	-0.0709355	-0.925857	-24.8202	-82.3247
753.5	-0.967384	-1.0046	-0.759313	1.45242	-1.31769	-0.889525	0.52716	-0.74719	-0.309778	0.493599	0.542569	0.0766105	-9.31138	-79.7597
754	-0.918619	-0.939757	-0.754961	1.44508	-1.30078	-0.886803	0.54782	-0.611734	-0.321086	0.200274	0.606411	1.02927	-0.465052	-78.7855
754.5	-0.937273	-0.871717	-0.750598	1.43713	-1.25861	-0.879869	0.561072	-0.446346	-0.248708	-0.190505	0.0615495	0.62564	-10.8924	-77.0279
755	-0.96373	-0.802601	-0.746234	1.4287	-1.23866	-0.868885	0.568044	-0.261477	-0.091374	-0.578823	-0.498684	-0.625382	-29.1277	-76.2729
755.5	-0.912456	-0.734465	-0.741856	1.41979	-1.19353	-0.854031	0.569364	-0.0686847	0.13425	-0.854877	-0.483263	-1.07542	-31.4826	-73.2906
756	-0.766387	-0.669214	-0.737472	1.41041	-1.17074	-0.8355	0.564557	0.118654	0.392667	-0.938035	0.0511357	-0.116692	-12.6102	-70.4086
756.5	-0.594682	-0.608517	-0.733081	1.40049	-1.12279	-0.8135	0.552502	0.287031	0.635214	-0.796518	0.478898	1.01315	9.01394	-65.7888
757	-0.475101	-0.55369	-0.728686	1.39017	-1.09728	-0.788238	0.531924	0.424755	0.810584	-0.452398	0.317768	0.823308	12.319	-62.5778
757.5	-0.411199	-0.505557	-0.724283	1.37938	-1.04674	-0.759919	0.502101	0.523939	0.876405	0.0272672	-0.230252	-0.462072	0.858278	-58.4628
758	-0.345372	-0.464349	-0.719873	1.36811	-1.01871	-0.728776	0.462817	0.580184	0.805886	0.538272	-0.529117	-1.16045	-4.0166	-55.6371
758.5	-0.245457	-0.429682	-0.715461	1.35628	-0.965742	-0.695017	0.415207	0.592623	0.590197	0.959753	-0.227962	-0.318256	9.91623	-51.6449
759	-0.158158	-0.400622	-0.711038	1.34405	-0.935388	-0.658854	0.361146	0.563937	0.245119	1.18306	0.355266	0.972622	27.1992	-49.5023
759.5	-0.161144	-0.375821	-0.706618	1.33126	-0.880228	-0.620494	0.302357	0.4996	-0.186811	1.13796	0.588923	0.9709	24.3685	-47.445
760	-0.270527	-0.353718	-0.702192	1.31815	-0.847753	-0.580142	0.240628	0.407024	-0.643176	0.811589	0.216013	-0.352928	-1.32793	-47.9697
760.5	-0.41012	-0.332776	-0.697759	1.30443	-0.790605	-0.53799	0.178432	0.298386	-1.0427	0.27337	-0.346552	-1.1814	-25.424	-47.763
761	-0.499974	-0.311704	-0.693327	1.29025	-0.756274	-0.494215	0.117969	0.185566	-1.30814	-0.361271	-0.527733	-0.403565	-29.5074	-48.2822
761.5	-0.529884	-0.289599	-0.688892	1.2757	-0.697326	-0.448998	0.0604933	0.0775939	-1.38669	-0.963483	-0.220009	0.879911	-21.117	-46.6724
762	-0.532872	-0.265988	-0.684459	1.26076	-0.661361	-0.402495	0.00706936	-0.0184349	-1.25512	-1.40126	0.208013	0.940055	-20.0723	-45.4115
762.5	-0.516559	-0.240789	-0.680017	1.24524	-0.600924	-0.354864	-0.0416427	-0.0975387	-0.92441	-1.55862	0.364133	-0.227176	-28.7582	-41.9959
763	-0.447264	-0.214232	-0.675579	1.22931	-0.563539	-0.306243	-0.0853627	-0.157663	-0.440795	-1.36272	0.205015	-1.01423	-31.718	-38.5977
763.5	-0.30214	-0.186769	-0.671136	1.21313	-0.501842	-0.256765	-0.124818	-0.200328	0.120764	-0.812567	-0.0392186	-0.45583	-17.2861	-32.6585
764	-0.109425	-0.158951	-0.6667	1.19634	-0.463335	-0.206547	-0.161489	-0.229846	0.668911	0.00518411	-0.178359	0.600242	5.644	-27.0334
764.5	0.0745016	-0.131278	-0.662261	1.17924	-0.40063	-0.15571	-0.19697	-0.251704	1.1116	0.920506	-0.205161	0.804464	21.4337	-20.0776
765	0.211967	-0.104036	-0.657823	1.16158	-0.361256	-0.104362	-0.232505	-0.270954	1.37313	1.70855	-0.168236	0.0313948	24.7952	-15.0428
765.5	0.295553	-0.0771787	-0.653387	1.14363	-0.29782	-0.0525978	-0.268473	-0.290762	1.40839	2.14278	-0.0387809	-0.675937	24.1704	-10.0266
766	0.316447	-0.0503068	-0.648949	1.12521	-0.257813	-0.000508579	-0.305546	-0.3138	1.21016	2.05179	0.186213	-0.543967	25.0279	-7.86138
766.5	0.259348	-0.0227538	-0.644519	1.10658	-0.193919	0.0518168	-0.342726	-0.337901	0.814492	1.40463	0.376945	0.217868	24.5327	-6.21247
767	0.11053	0.00626811	-0.640088	1.08737	-0.153615	0.104275	-0.378555	-0.359239	0.291824	0.325121	0.290026	0.696273	12.6339	-7.32033
767.5	-0.0993275	0.0375153	-0.635657	1.06797	-0.089516	0.156787	-0.410578	-0.370684	-0.261182	-0.915178	-0.110336	0.347172	-12.212	-7.89999
768	-0.287157	0.0715867	-0.631235	1.04806	-0.0491251	0.209259	-0.436323	-0.364338	-0.741577	-1.97516	-0.506619	-0.433586	-38.8064	-9.03518
768.5	-0.359964	0.108851	-0.626813	1.02791	0.0148818	0.261596	-0.454662	-0.334177	-1.05838	-2.55226	-0.485783	-0.732405	-49.4009	-6.93204
769	-0.277144	0.14946	-0.622398	1.00724	0.0550332	0.313692	-0.465157	-0.276708	-1.15265	-2.47572	0.0171582	-0.11893	-37.1843	-3.38362
769.5	-0.0821026	0.193424	-0.617989	0.986426	0.118679	0.365433	-0.490787	-0.181064	-1.0433	-1.74432	0.576876	0.741326	-12.8873	3.52214
770	0.137712	0.240675	-0.613583	0.965077	0.158393	0.416694	-0.507021	-0.0667964	-0.738517	-0.563502	0.609743	0.650778	3.11265	10.4058
770.5	0.330685	0.291045	-0.609184	0.943575	0.221417	0.467342	-0.513574	0.0594988	-0.300821	0.746668	0.00697441	-0.36045	6.61447	18.6716
771	0.509215	0.344187	-0.604795	0.921622	0.260375	0.517224	-0.51026	0.189795	0.182492	1.84162	-0.686247	-0.942905	11.6893	25.2942
771.5	0.695676	0.399531	-0.600403	0.899209	0.32255	0.56618	-0.49712	0.315868	0.618236	2.45428	-0.759804	-0.227502	30.9149	32.3685
772	0.855593	0.456344	-0.596023	0.876841	0.360506	0.614031	-0.47465	0.428783	0.92167	2.45684	-0.0678743	0.845229	53.6535	36.9013
772.5	0.915605	0.513883	-0.591655	0.853944	0.421575	0.660582	-0.443445	0.52038	1.03337	1.88643	0.78037	0.770346	58.919	40.7182
773	0.837957	0.571497	-0.587289	0.830651	0.458322	0.705634	-0.404256	0.583294	0.929836	0.914961	0.961179	-0.40114	39.9119	41.2258
773.5	0.67396	0.628665	-0.582932	0.807377	0.518021	0.748956	-0.356921	0.614302	0.632596	-0.195473	0.254269	-1.02086	14.1933	41.629
774	0.521637	0.684974	-0.578583	0.783693	0.553299	0.790335	-0.301098	0.612891	0.201641	-1.17543	-0.737742	-0.195077	-0.460741	40.774
774.5	0.451447	0.740126	-0.574242	0.75966	0.611417	0.829509	-0.23669	0.579731	-0.278768	-1.81982	-1.13585	0.901651	-3.63401	42.1958
775	0.479316	0.793974	-0.56991	0.735379	0.645007	0.866231	-0.163884	0.517032	-0.713839	-2.02154	-0.565433	0.710676	-5.60282	43.9509
775.5	0.584341	0.846503	-0.565594	0.710823	0.701305	0.900241	-0.0833622	0.428002	-1.01617	-1.78091	0.503284	-0.486347	-6.88723	48.372
776	0.730837	0.897748	-0.561284	0.686154	0.733026	0.931271	0.00371912	0.316282	-1.12296	-1.19201	1.16415	-0.986879	-0.285321	52.5208
776.5	0.879421	0.947665	-0.556984	0.661225	0.787284	0.959046	0.0959216	0.186303	-1.00725	-0.410627	0.864183	-0.0908766	14.8822	58.2064
777	1.00002	0.996133	-0.552695	0.636168	0.816902	0.983292	0.191518	0.0429707	-0.683892	0.379816	-0.138166	0.921645	25.9756	62.4996
777.5	1.09313	1.04298	-0.548419	0.610639	0.868961	1.00375	0.28878	-0.108478	-0.209233	1.00538	-1.01437	0.630502	25.2751	67.6266
778	1.18963	1.08803	-0.544154	0.58513	0.896275	1.02014	0.386107	-0.261797	0.330679	1.34157	-1.05995	-0.525515	21.6848	71.1776
778.5	1.30685	1.13115	-0.539902	0.559314	0.945939	1.03222	0.481809	-0.410552	0.836166	1.33791	-0.270641	-0.931972	30.4029	75.4727
779	1.413	1.17226	-0.535663	0.5334	0.970771	1.03974	0.574196	-0.548029	1.21131	1.03154	0.686327	-0.0506372	49.1295	77.6528
779.5	1.4475	1.21144	-0.531431	0.507194	1.01785	1.04246	0.661299	-0.66838	1.37893	0.532768	1.04409	0.870582	58.5537	79.6627
780	1.38957	1.24905	-0.527215	0.480886	1.04008	1.04019	0.741312	-0.765592	1.29715	0.0010515	0.583278	0.578011	44.6915	79.1276
780.5	1.29532	1.28594	-0.523015	0.454427	1.0844	1.03274	0.813529	-0.830926	0.973672	-0.390544	-0.215662	-0.465424	19.332	79.3154
781	1.24408	1.32337	-0.518832	0.427814	1.10386	1.01994	0.877393	-0.856003	0.460124	-0.530374	-0.70091	-0.835085	4.47926	78.7912
781.5	1.26252	1.36277	-0.514659	0.400961	1.14531	1.00166	0.931706	-0.8357	-0.160448	-0.422993	-0.641942	-0.106193	7.97702	80.3139
782	1.31594	1.40525	-0.510502	0.37401	1.16187	0.977795	0.975114	-0.767169	-0.784088	-0.179242	-0.278064	0.709237	16.7897	81.0889
782.5	1.36179	1.4512	-0.506359	0.346938	1.20034	0.948275	1.00703	-0.648795	-1.30395	0.0390582	0.0705565	0.59015	17.4324	82.9779
783	1.38747	1.49999	-0.502229	0.319877	1.21385	0.913073	1.0265	-0.48298	-1.62913	0.0806731	0.30515	-0.292475	9.52305	83.2742
783.5	1.41253	1.54993	-0.498118	0.292649	1.24921	0.872192	1.03238	-0.274719	-1.69622	-0.11359	0.505222	-0.793756	5.75253	84.5122
784	1.44953	1.59835	-0.494022	0.265279	1.25962	0.825671	1.02357	-0.0324742	-1.48429	-0.476829	0.620401	-0.247363	12.5957	84.496
784.5	1.48456	1.64189	-0.489938	0.238036	1.29176	0.773608	0.998799	0.231828	-1.01966	-0.835697	0.393941	0.654382	22.3706	85.7391
785	1.50579	1.67672	-0.48588	0.210395	1.29901	0.716127	0.957885	0.504091	-0.373734	-0.978697	-0.305602	0.70539	22.4898	85.9755
785.5	1.5437	1.69875	-0.481833	0.182935	1.32783	0.653397	0.900738	0.768529	0.350521	-0.754879	-1.1008	-0.217215	16.2923	87.9777
786	1.65516	1.7039	-0.477806	0.155375	1.33184	0.585644	0.826064	1.00643	1.03572	-0.163804	-1.24938	-0.903021	21.4706	89.6756
786.5	1.85399	1.68834	-0.473798	0.127695	1.35735	0.513134	0.731702	1.19821	1.56975	0.629427	-0.334307	-0.351316	49.6785	93.1234
787	2.05066	1.64894	-0.469802	0.0999149	1.35805	0.436167	0.615029	1.32454	1.86314	1.34574	1.1271	0.730662	84.3054	94.5448
787.5	2.0955	1.58363	-0.465828	0.0723818	1.38013	0.355095	0.4738	1.36864	1.86312	1.70219	1.92125	0.801623	94.7241	94.4681
788	1.90205	1.49162	-0.461875	0.044691	1.37756	0.270319	0.306335	1.31872	1.5657	1.53124	1.18637	-0.292274	68.468	89.461
788.5	1.53527	1.37344	-0.457936	0.0169845	1.39618	0.182273	0.113909	1.17504	1.02798	0.882539	-0.621532	-0.925676	27.8976	82.6236
789	1.14573	1.23089	-0.454022	-0.0108202	1.3903	0.0914447	-0.0999733	0.947741	0.352432	-0.00529429	-2.02071	-0.141494	0.496033	73.5281
789.5	0.842932	1.06699	-0.450121	-0.0384253	1.40546	-0.00165719	-0.331161	0.652525	-0.339269	-0.819638	-1.81252	0.815971	-9.18836	66.2682
790	0.648361	0.885882	-0.446247	-0.0660785	1.3963	-0.0964764	-0.574586	0.311341	-0.925364	-1.28974	-0.133761	0.460045	-13.6457	59.2966
790.5	0.513313	0.692616	-0.44239	-0.0937785	1.40799	-0.192432	-0.823995	-0.0538797	-1.32359	-1.31148	1.59537	-0.645392	-18.8357	54.6836
791	0.382663	0.492787	-0.438555	-0.12123	1.3957	-0.288917	-1.07254	-0.418882	-1.48953	-0.951343	1.97531	-0.679258	-20.8925	49.5212
791.5	0.214488	0.292321	-0.43474	-0.148868	1.40399	-0.385306	-1.31462	-0.760584	-1.41305	-0.403849	0.79652	0.428426	-22.3208	45.6433
792	0.00798178	0.0966169	-0.43094	-0.176273	1.38873	-0.480961	-1.54403	-1.05672	-1.12597	0.110079	-0.873044	0.871728	-33.174	40.7477
792.5	-0.183371	-0.0892688	-0.427172	-0.203603	1.39356	-0.57523	-1.75419	-1.28754	-0.697618	0.435724	-1.69184	-0.131682	-49.3959	37.4518
793	-0.289526	-0.261046	-0.423416	-0.23089	1.37539	-0.667452	-1.93837	-1.43635	-0.217673	0.536156	-1.14283	-0.982229	-51.2766	33.926
793.5	-0.319752	-0.415522	-0.419689	-0.258029	1.37658	-0.756981	-2.0934	-1.4974	0.214223	0.446019	0.119206	-0.303669	-31.7314	32.0792
794	-0.363902	-0.550778	-0.415979	-0.285175	1.35563	-0.843167	-2.21854	-1.4732	0.512847	0.244947	1.02414	0.891776	-12.0671	29.0378
794.5	-0.502862	-0.666148	-0.412294	-0.312124	1.35289	-0.925375	-2.31434	-1.3729	0.62714	0.0153451	1.01171	0.70707	-16.2287	26.3981
795	-0.711509	-0.762	-0.408634	-0.339021	1.32925	-1.00299	-2.38067	-1.2066	0.550747	-0.168357	0.353913	-0.597601	-38.6996	22.5009
795.5	-0.893191	-0.839426	-0.404991	-0.365797	1.32229	-1.07541	-2.41629	-0.985597	0.31981	-0.260571	-0.295879	-0.987691	-51.5012	20.1035
796	-0.990298	-0.899982	-0.401374	-0.392224	1.29693	-1.14206	-2.42296	-0.722643	0.0107283	-0.252621	-0.526372	0.214443	-43.3814	17.8454
796.5	-1.04319	-0.945529	-0.397782	-0.418695	1.28605	-1.2024	-2.40142	-0.434384	-0.299615	-0.178306	-0.464824	1.15726	-33.5412	17.11
797	-1.10747	-0.978153	-0.394213	-0.445059	1.26065	-1.25594	-2.35479	-0.138815	-0.52919	-0.0810129	-0.38546	0.187527	-41.363	15.9807
797.5	-1.15162	-1.00008	-0.390667	-0.471092	1.24634	-1.30219	-2.28067	0.154169	-0.612231	0.0515115	-0.22534	-1.33987	-51.7005	16.1233
798	-1.07811	-1.01354	-0.387145	-0.496903	1.22216	-1.34077	-2.17051	0.447974	-0.495697	0.308166	0.421404	-0.660183	-31.515	17.4632
798.5	-0.8936	-1.02067	-0.38365	-0.522675	1.20531	-1.37128	-2.02243	0.734717	-0.190602	0.68095	1.48215	2.06454	16.7703	20.7731
